# Supplementary material for: Metabolic alterations in the erythrocyte during blood-stage development of the malaria parasite
Source: Malar J. 2020 Feb 27;19:94. doi: 10.1186/s12936-020-03174-z (PMC7045481; doi:10.1186/s12936-020-03174-z)
Supplement: Supplementary file 8 — Additional file 8. Comparison of lipid metabolites from this study with Gulati et al. [53]. [file 12936_2020_3174_MOESM8_ESM.xlsx]

## Sheet: Sheet1
Additional file 8: Lipid metabolites quantified in Gulati et al. (PMID: 26355219) and this study. Table 3 of the manuscript reports the average percentage of each subclass across the measured time points.
Lipid Subclass	Shortname in Gulati et al	Metabolite name in this study	Re-normalized data from Gulati et al.						Re-normalized data from Gulati et al. represented as percent of total within each subclass at each time point						Re-normalized data from this study						Re-normalized data from this study represented as percent of total within each subclass at each time point
			T = 8h	T = 16h	T = 24h	T = 32h	T = 40h	T = 48h	T = 8h	T = 16h	T = 24h	T = 32h	T = 40h	T = 48h	T = 0h	T = 8h	T = 16h	T = 24 h	T = 32h	T = 40h	T = 0h	T = 8h	T = 16h	T = 24 h	T = 32h	T = 40h
Ceramide (Cer)	Cer d18:0/16:0	N-palmitoyl-sphinganine (d18:0/16:0)	0.000882083	0.000805561	0.00101506	0.00141624	0.00169089	0.00127232	0.00249901	0.00248582	0.00328315	0.00456695	0.00498095	0.00448166	0.0030192	0.00280284	0.0030996	0.00308068	0.00313167	0.00340081	0.006481	0.00572819	0.00630221	0.006531	0.00654516	0.00689628
	Cer d18:0/18:0	N-stearoyl-sphinganine (d18:0/18:0)*	0.00161693	0.00168026	0.00226809	0.00315071	0.00329006	0.00320934							0.0034618	0.00292535	0.00320261	0.00345033	0.00341348	0.00349548
Lactosylceramide (LacCer)	LacCer d18:1/24:0	lactosyl-N-nervonoyl-sphingosine (d18:1/24:1)*	0.000938632	0.000738956	0.000580693	0.000629526	0.000521376	0.000351488	0.000938632	0.000738956	0.000580693	0.000629526	0.000521376	0.000351488	0.000873294	0.000645889	0.000774235	0.000638758	0.000660212	0.000803738	0.000873294	0.000645889	0.000774235	0.000638758	0.000660212	0.000803738
Dihydrosphingomyelin (dhSM)	dhSM d18:0/16:0	palmitoyl dihydrosphingomyelin (d18:0/16:0)*	0.0109964	0.010688	0.0107647	0.0100633	0.00995333	0.0105884	0.0150144	0.0141285	0.0134709	0.0133141	0.0128554	0.0131032	0.0361071	0.0388129	0.0377229	0.0389364	0.0393149	0.042021	0.0392543	0.0416557	0.0408393	0.0419747	0.0423027	0.0451211
	dhSM d18:0/22:0	behenoyl dihydrosphingomyelin (d18:0/22:0)*	0.00401804	0.00344051	0.00270619	0.00325081	0.00290212	0.0025148							0.00314724	0.00284276	0.00311646	0.00303829	0.00298778	0.0031001
Lyso phosphatidylcholine (lyso PC)	Lyso PC 16:0	2-palmitoyl-GPC (16:0)*	0.00309829	0.00269668	0.00313723	0.00400421	0.00503203	0.0046214	0.00804667	0.00646159	0.00798322	0.00988206	0.0111755	0.011021	0.000708095	0.000443741	0.000437245	0.000253375	0.00018007	0.000220759	0.0234413	0.0159267	0.0133955	0.00731422	0.00341109	0.0022254
	Lyso PC 18:0	1-stearoyl-GPC (18:0)	0.00191952	0.00122599	0.00170122	0.0020159	0.00151823	0.00165946							0.0204629	0.0137554	0.0116673	0.00653755	0.00290892	0.00168613
	Lyso PC 18:1	1-oleoyl-GPC (18:1)	0.00302887	0.00253892	0.00314476	0.00386195	0.00462525	0.00474015							0.00227033	0.00172749	0.00129095	0.000523298	0.000322101	0.000318509
Lyso phosphatidylethanolamine (lyso PE)	Lyso PE 16:0	1-palmitoyl-GPE (16:0)	0.00230425	0.00193121	0.0017409	0.00297885	0.00360908	0.002704	0.00709151	0.00505085	0.00483715	0.00825958	0.0109063	0.00789127	0.00118137	0.00125289	0.00140491	0.00129795	0.00125077	0.00120056	0.0031105	0.00331073	0.0035438	0.00301073	0.00271035	0.00291803
	Lyso PE 18:0	1-stearoyl-GPE (18:0)	0.00170977	0.00109481	0.00102313	0.00207413	0.00305196	0.00206723							0.000807736	0.000854344	0.00100143	0.000925125	0.000872029	0.00107141
	Lyso PE 18:1	1-oleoyl-GPE (18:1)	0.0030775	0.00202483	0.00207313	0.0032066	0.00424526	0.00312004							0.00112139	0.00120349	0.00113745	0.000787653	0.000587543	0.000646057
Lyso phosphatidylinositol (lyso PI)	Lyso PI 18:0	1-stearoyl-GPI (18:0)	0.00137052	0.00111408	0.000905038	0.00149508	0.00238303	0.00191132	0.00157597	0.0012622	0.0010405	0.00174385	0.0027205	0.00209818	5.46348e-05	6.10491e-05	8.29282e-05	0.000181277	0.000190298	0.000167836	5.46348e-05	0.000122029	0.000176647	0.000270231	0.000295594	0.000219415
	Lyso PI 20:4	1-arachidonoyl-GPI (20:4)*	0.00020545	0.00014812	0.00013546	0.000248762	0.000337467	0.000186865							0	6.09803e-05	9.37187e-05	8.89543e-05	0.000105297	5.15792e-05
Sphingomyelin (SM)	SM d18:1/16:0	palmitoyl sphingomyelin (d18:1/16:0)	0.580433	0.593556	0.620541	0.588741	0.591104	0.609692	0.964858	0.969866	0.968781	0.961571	0.956845	0.961034	0.379771	0.404974	0.413954	0.384208	0.396163	0.422544	0.927726	0.932609	0.934162	0.941926	0.942593	0.941154
	SM d18:1/18:0	stearoyl sphingomyelin (d18:1/18:0)	0.0640327	0.059493	0.0536299	0.0590902	0.0509856	0.0472087							0.0479692	0.0507247	0.0509828	0.046726	0.045861	0.045243
	SM d18:1/22:0	behenoyl sphingomyelin (d18:1/22:0)*	0.151476	0.141836	0.131972	0.147916	0.152699	0.13382							0.156287	0.165735	0.149417	0.159878	0.168586	0.151472
	SM d18:1/24:0	lignoceroyl sphingomyelin (d18:1/24:0)	0.168916	0.17498	0.162638	0.165824	0.162056	0.170313							0.343699	0.311175	0.319808	0.351115	0.331983	0.321895
Normalizing factors for each dataset at each time point:			14.683	14.994	14.875	12.44	9.183	9.93							0.137	0.136	0.133	0.142	0.143	0.13
The normalizing factors for the Gulati et al data were obtained by the summation of the values of all these metabolites reported in their study. In our case, the normalizing factors are obtained by summation of average raw counts of each of these metabolites. Before performing the summation, the raw counts were normalized by the Bradford protein concentration of each sample. The Bradford protein …
