# Supplementary material for: Metabolic alterations in the erythrocyte during blood-stage development of the malaria parasite
Source: Malar J. 2020 Feb 27;19:94. doi: 10.1186/s12936-020-03174-z (PMC7045481; doi:10.1186/s12936-020-03174-z)
Supplement: Supplementary file 9 — Additional file 9. Results of two-way ANOVA performed on data from uRBC and iRBC cultures obtained at 0–8 h (Sheet 1), 16–24 h (Sheet 2), and 32–40 h (Sheet 3). [file 12936_2020_3174_MOESM9_ESM.xlsx]

## Sheet: t_0h_8h
Additional file 9 (Sheet 1): Results of two-way ANOVA performed on data from uRBC and iRBC cultures at 0 and 8 h time points. Columns D, E, and F show p-values of treatment, time, and interaction effects. In our case, the treatment effect corresponds to parasite-infection.
Major pathway	Subordinate pathway	Biochemical name	treatment		time		interaction
			p-value	q-value	p-value	q-value	p-value	q-value
Amino Acid	Alanine and Aspartate Metabolism	3-sulfo-L-alanine	0.324775	0.301179	0.00765474	0.0373666	0.0128146	0.092106
Amino Acid	Alanine and Aspartate Metabolism	alanine	4.18784e-05	0.000190096	0.14845	0.15004	0.00246692	0.0527035
Amino Acid	Alanine and Aspartate Metabolism	asparagine	0.602252	0.444172	0.150179	0.151078	0.594347	0.435285
Amino Acid	Alanine and Aspartate Metabolism	aspartate	0.0452705	0.0670025	0.870371	0.428354	0.407233	0.385873
Amino Acid	Alanine and Aspartate Metabolism	N-acetylalanine	0.0127847	0.0242202	0.878348	0.431351	0.104773	0.24481
Amino Acid	Alanine and Aspartate Metabolism	N-acetylasparagine	0.000823767	0.00251692	0.794899	0.403548	0.43949	0.392478
Amino Acid	Alanine and Aspartate Metabolism	N-acetylaspartate (NAA)	0.261103	0.254974	0.817308	0.410196	0.218782	0.32208
Amino Acid	Creatine Metabolism	creatine	0.168113	0.186611	0.0324493	0.0752421	0.491378	0.402572
Amino Acid	Creatine Metabolism	creatine phosphate	0.552671	0.429104	0.704048	0.372165	0.00166145	0.0419489
Amino Acid	Creatine Metabolism	creatinine	0.654662	0.462773	0.324296	0.234353	0.293154	0.346424
Amino Acid	Creatine Metabolism	guanidinoacetate	0.372992	0.332266	0.0675226	0.11255	0.943778	0.552053
Amino Acid	Glutamate Metabolism	4-hydroxyglutamate	0.920285	0.549405	0.622848	0.34461	0.316543	0.354494
Amino Acid	Glutamate Metabolism	beta-citrylglutamate	0.186003	0.200975	0.472234	0.292246	0.174309	0.290711
Amino Acid	Glutamate Metabolism	carboxyethyl-GABA	0.595452	0.444172	0.308696	0.226276	0.112204	0.247323
Amino Acid	Glutamate Metabolism	glutamate	6.19714e-05	0.000266824	0.113754	0.135515	0.70945	0.472512
Amino Acid	Glutamate Metabolism	glutamate, gamma-methyl ester	0.897977	0.544286	0.892731	0.435604	0.00553975	0.0801268
Amino Acid	Glutamate Metabolism	glutamine	0.155978	0.17659	0.0288911	0.0701864	0.953935	0.553261
Amino Acid	Glutamate Metabolism	N-acetylglutamate	0.00728443	0.0148922	0.468831	0.292246	0.494972	0.403138
Amino Acid	Glutamate Metabolism	N-acetylglutamine	0.450308	0.374696	0.702148	0.372165	0.68115	0.461486
Amino Acid	Glutamate Metabolism	pyroglutamine*	0.117643	0.143369	0.0162263	0.0537017	0.303608	0.349662
Amino Acid	Glutamate Metabolism	S-1-pyrroline-5-carboxylate	0.785191	0.512936	0.895149	0.435852	0.66437	0.461486
Amino Acid	Glutathione Metabolism	4-hydroxy-nonenal-glutathione	0.697827	0.481313	0.0753712	0.113233	0.694436	0.468126
Amino Acid	Glutathione Metabolism	5-oxoproline	0.0712043	0.094112	0.11493	0.135515	0.362833	0.368786
Amino Acid	Glutathione Metabolism	cysteine-glutathione disulfide	0.436496	0.369163	0.42439	0.277374	0.813092	0.502945
Amino Acid	Glutathione Metabolism	cysteinylglycine	0.505081	0.40317	0.0326196	0.0752421	0.193761	0.312872
Amino Acid	Glutathione Metabolism	glutathione, oxidized (GSSG)	0.35886	0.323737	0.245225	0.198578	0.698385	0.469648
Amino Acid	Glutathione Metabolism	glutathione, reduced (GSH)	0.752913	0.501176	0.0877081	0.121223	0.102317	0.243118
Amino Acid	Glutathione Metabolism	ophthalmate	0.0615759	0.084897	0.0368102	0.0808262	0.865501	0.524319
Amino Acid	Glutathione Metabolism	S-lactoylglutathione	0.00920499	0.0184209	0.0807894	0.116031	0.00860171	0.0801268
Amino Acid	Glutathione Metabolism	S-methylglutathione	0.0306833	0.0487108	0.24993	0.199558	0.694134	0.468126
Amino Acid	Glutathione Metabolism	S-nitrosoglutathione (GSNO)	0.00558375	0.0120207	0.622275	0.34461	0.609842	0.43922
Amino Acid	Glycine, Serine and Threonine Metabolism	betaine	0.109889	0.13577	0.16027	0.157077	0.456154	0.392773
Amino Acid	Glycine, Serine and Threonine Metabolism	dimethylglycine	0.0515109	0.0735569	0.000225396	0.00445963	0.0750485	0.21054
Amino Acid	Glycine, Serine and Threonine Metabolism	glycine	0.184281	0.20064	0.0465611	0.0886051	0.340956	0.368786
Amino Acid	Glycine, Serine and Threonine Metabolism	N-acetylglycine	0.000107988	0.000444739	0.402743	0.267354	0.832672	0.511523
Amino Acid	Glycine, Serine and Threonine Metabolism	N-acetylserine	1.83355e-12	1.73679e-10	0.139735	0.147401	0.11501	0.247441
Amino Acid	Glycine, Serine and Threonine Metabolism	N-acetylthreonine	0.00295761	0.00706271	0.080436	0.116031	0.15257	0.271626
Amino Acid	Glycine, Serine and Threonine Metabolism	serine	0.554985	0.429726	0.255396	0.202507	0.215645	0.32208
Amino Acid	Glycine, Serine and Threonine Metabolism	threonine	0.103772	0.130481	0.0403751	0.0838146	0.481122	0.400132
Amino Acid	Guanidino and Acetamido Metabolism	4-guanidinobutanoate	0.415802	0.356974	0.292267	0.222537	0.137758	0.262053
Amino Acid	Histidine Metabolism	4-imidazoleacetate	0.827964	0.5237	5.06184e-08	5.77956e-06	0.141649	0.265307
Amino Acid	Histidine Metabolism	formiminoglutamate	0.00343952	0.00803472	0.114466	0.135515	0.117113	0.247441
Amino Acid	Histidine Metabolism	histidine	0.0115133	0.0222567	0.203866	0.180444	0.551856	0.423079
Amino Acid	Histidine Metabolism	imidazole lactate	0.000156735	0.000593859	0.00180642	0.0150508	0.211972	0.321703
Amino Acid	Histidine Metabolism	N-acetylhistidine	0.0365992	0.0559159	0.958715	0.447711	0.458848	0.392773
Amino Acid	Leucine, Isoleucine and Valine Metabolism	2-methylbutyrylcarnitine (C5)	0.898303	0.544286	0.0228111	0.061503	0.793751	0.497821
Amino Acid	Leucine, Isoleucine and Valine Metabolism	3-methyl-2-oxobutyrate	0.19817	0.211706	0.76312	0.392905	0.211248	0.321703
Amino Acid	Leucine, Isoleucine and Valine Metabolism	3-methyl-2-oxovalerate	0.248003	0.246415	0.430679	0.278336	0.618735	0.441532
Amino Acid	Leucine, Isoleucine and Valine Metabolism	3-methylglutaconate	0.816018	0.521281	0.0297515	0.0715158	0.0904329	0.226972
Amino Acid	Leucine, Isoleucine and Valine Metabolism	4-methyl-2-oxopentanoate	0.962801	0.560652	0.667862	0.363124	0.759914	0.488549
Amino Acid	Leucine, Isoleucine and Valine Metabolism	beta-hydroxyisovalerate	0.97768	0.564276	0.850593	0.422261	0.870488	0.525572
Amino Acid	Leucine, Isoleucine and Valine Metabolism	isobutyrylcarnitine (C4)	0.154859	0.176025	0.0190686	0.0571411	0.291147	0.346424
Amino Acid	Leucine, Isoleucine and Valine Metabolism	isobutyrylglycine	0.939078	0.553645	0.211532	0.184371	0.829882	0.511523
Amino Acid	Leucine, Isoleucine and Valine Metabolism	isoleucine	0.95255	0.559267	0.063964	0.108198	0.46084	0.392773
Amino Acid	Leucine, Isoleucine and Valine Metabolism	isovalerylcarnitine (C5)	0.79621	0.515521	0.0253619	0.0658137	0.983411	0.555466
Amino Acid	Leucine, Isoleucine and Valine Metabolism	isovalerylglycine	0.0441213	0.0656435	0.411952	0.271103	0.122272	0.251004
Amino Acid	Leucine, Isoleucine and Valine Metabolism	leucine	0.758635	0.502519	0.0586044	0.101837	0.611586	0.43922
Amino Acid	Leucine, Isoleucine and Valine Metabolism	methylsuccinate	0.908976	0.546095	0.562413	0.32753	0.706532	0.472176
Amino Acid	Leucine, Isoleucine and Valine Metabolism	N-acetylisoleucine	0.897328	0.544286	0.358206	0.250151	0.962165	0.553261
Amino Acid	Leucine, Isoleucine and Valine Metabolism	N-acetylleucine	0.650871	0.462773	0.885031	0.4337	0.620012	0.441532
Amino Acid	Leucine, Isoleucine and Valine Metabolism	N-acetylvaline	1.64689e-09	3.11997e-08	0.497501	0.302956	0.277451	0.340962
Amino Acid	Leucine, Isoleucine and Valine Metabolism	tiglylcarnitine (C5:1-DC)	0.820867	0.521846	0.478029	0.295032	0.424846	0.390707
Amino Acid	Leucine, Isoleucine and Valine Metabolism	valine	0.241303	0.2423	0.223333	0.188888	0.742615	0.480766
Amino Acid	Lysine Metabolism	2-aminoadipate	0.106113	0.132838	0.98109	0.453522	0.146438	0.267958
Amino Acid	Lysine Metabolism	glutarylcarnitine (C5-DC)	0.903865	0.545331	0.465013	0.291394	0.839749	0.513713
Amino Acid	Lysine Metabolism	lysine	0.0167277	0.0297093	0.0318595	0.0752421	0.599075	0.436701
Amino Acid	Lysine Metabolism	N6,N6,N6-trimethyllysine	0.0626199	0.0851418	0.124581	0.138776	0.244543	0.322793
Amino Acid	Lysine Metabolism	N6-acetyllysine	1.19414e-08	1.6967e-07	0.122957	0.137893	0.0442223	0.165571
Amino Acid	Lysine Metabolism	pipecolate	1.58467e-11	7.50522e-10	0.000723966	0.00870124	0.000635479	0.0352987
Amino Acid	Methionine, Cysteine, SAM and Taurine Metabolism	cysteine	0.836674	0.525448	0.120981	0.136956	0.998375	0.555466
Amino Acid	Methionine, Cysteine, SAM and Taurine Metabolism	cysteine sulfinic acid	0.219047	0.229371	0.00826829	0.0386131	0.43055	0.392058
Amino Acid	Methionine, Cysteine, SAM and Taurine Metabolism	hypotaurine	0.228292	0.235903	0.00023318	0.00445963	0.703328	0.471829
Amino Acid	Methionine, Cysteine, SAM and Taurine Metabolism	methionine	0.628339	0.455496	0.0760493	0.113233	0.358743	0.368786
Amino Acid	Methionine, Cysteine, SAM and Taurine Metabolism	methionine sulfoxide	0.213961	0.225189	0.842754	0.420196	0.424399	0.390707
Amino Acid	Methionine, Cysteine, SAM and Taurine Metabolism	N-acetylcysteine	0.981331	0.564276	0.0395538	0.0830847	0.779474	0.495847
Amino Acid	Methionine, Cysteine, SAM and Taurine Metabolism	N-acetylmethionine	9.93013e-07	8.26783e-06	0.750431	0.390132	0.00891945	0.0801268
Amino Acid	Methionine, Cysteine, SAM and Taurine Metabolism	N-acetylmethionine sulfoxide	0.00232613	0.00590192	0.44017	0.27999	0.0396969	0.157502
Amino Acid	Methionine, Cysteine, SAM and Taurine Metabolism	N-formylmethionine	0.160424	0.179479	0.00606486	0.0341995	0.164519	0.280358
Amino Acid	Methionine, Cysteine, SAM and Taurine Metabolism	S-adenosylhomocysteine (SAH)	0.0135524	0.0253367	0.281227	0.217697	0.00663022	0.0801268
Amino Acid	Methionine, Cysteine, SAM and Taurine Metabolism	taurine	0.00108568	0.00318058	0.000347133	0.00528471	0.14713	0.267958
Amino Acid	Phenylalanine and Tyrosine Metabolism	3-(4-hydroxyphenyl)lactate	3.98556e-09	6.29208e-08	9.15807e-06	0.000418265	0.00690761	0.0801268
Amino Acid	Phenylalanine and Tyrosine Metabolism	3-phenylpropionate (hydrocinnamate)	0.956818	0.559987	0.283992	0.219094	0.0845791	0.221607
Amino Acid	Phenylalanine and Tyrosine Metabolism	4-hydroxyphenylpyruvate	0.0272125	0.0436891	0.995275	0.456717	0.166614	0.28045
Amino Acid	Phenylalanine and Tyrosine Metabolism	N-acetylphenylalanine	0.88287	0.541867	0.192301	0.175598	0.226628	0.32208
Amino Acid	Phenylalanine and Tyrosine Metabolism	N-formylphenylalanine	0.185881	0.200975	0.699073	0.372165	0.100533	0.242793
Amino Acid	Phenylalanine and Tyrosine Metabolism	p-cresol sulfate	0.809124	0.521043	0.039658	0.0830847	0.522764	0.410138
Amino Acid	Phenylalanine and Tyrosine Metabolism	phenol sulfate	0.384328	0.339174	0.11919	0.136942	0.227336	0.32208
Amino Acid	Phenylalanine and Tyrosine Metabolism	phenylalanine	0.30084	0.284965	0.0432187	0.0847423	0.438783	0.392478
Amino Acid	Phenylalanine and Tyrosine Metabolism	phenyllactate (PLA)	0.887168	0.543331	0.625979	0.34461	0.679242	0.461486
Amino Acid	Phenylalanine and Tyrosine Metabolism	phenylpyruvate	0.0316742	0.0497283	0.30214	0.224743	0.673965	0.461486
Amino Acid	Phenylalanine and Tyrosine Metabolism	p-toluic acid	0.0199843	0.0344177	0.157714	0.155239	0.223528	0.32208
Amino Acid	Phenylalanine and Tyrosine Metabolism	tyrosine	0.102492	0.129445	0.106469	0.131866	0.985241	0.555466
Amino Acid	Polyamine Metabolism	5-methylthioadenosine (MTA)	9.34816e-09	1.39814e-07	0.000554122	0.00737985	0.0134411	0.092106
Amino Acid	Polyamine Metabolism	N(1)-acetylspermine	4.2144e-05	0.000190096	0.0197307	0.0571411	0.465027	0.392773
Amino Acid	Polyamine Metabolism	N(4)-acetylspermidine	0.00585112	0.0124083	0.457505	0.288133	0.457505	0.392773
Amino Acid	Polyamine Metabolism	N1,N12-diacetylspermine	5.86601e-12	3.33388e-10	0.00725106	0.0373666	0.1877	0.304856
Amino Acid	Polyamine Metabolism	putrescine	0.00178119	0.00482057	0.0588659	0.101837	0.0588659	0.187919
Amino Acid	Polyamine Metabolism	spermidine	8.20336e-07	7.51982e-06	0.378057	0.257709	0.956605	0.553261
Amino Acid	Polyamine Metabolism	spermine	0.892197	0.544066	0.995981	0.456717	0.332634	0.363299
Amino Acid	Tryptophan Metabolism	3-indoxyl sulfate	0.739683	0.496915	0.249059	0.199558	0.157415	0.274964
Amino Acid	Tryptophan Metabolism	C-glycosyltryptophan	0.959914	0.560119	0.404637	0.267833	0.671275	0.461486
Amino Acid	Tryptophan Metabolism	indolelactate	0.0660432	0.0893687	0.0366106	0.0808262	0.548022	0.422323
Amino Acid	Tryptophan Metabolism	kynurenine	0.569072	0.437062	0.0434179	0.0847423	0.149324	0.267958
Amino Acid	Tryptophan Metabolism	tryptophan	0.482929	0.392092	0.0353138	0.0790609	0.237446	0.322793
Amino Acid	Tryptophan Metabolism	tryptophan betaine	0.0476832	0.0694877	0.108784	0.132843	0.0894253	0.226972
Amino Acid	Urea cycle; Arginine and Proline Metabolism	2-oxoarginine*	0.0685236	0.0914192	0.624589	0.34461	0.453454	0.392773
Amino Acid	Urea cycle; Arginine and Proline Metabolism	argininate*	0.732614	0.494504	0.546734	0.320954	0.775066	0.494854
Amino Acid	Urea cycle; Arginine and Proline Metabolism	arginine	0.344361	0.313644	0.0211222	0.0588224	0.834326	0.511523
Amino Acid	Urea cycle; Arginine and Proline Metabolism	argininosuccinate	1.97071e-05	0.000101821	0.0771582	0.113676	0.351558	0.368786
Amino Acid	Urea cycle; Arginine and Proline Metabolism	citrulline	0.649893	0.462773	0.0191015	0.0571411	0.400261	0.384656
Amino Acid	Urea cycle; Arginine and Proline Metabolism	dimethylarginine (SDMA + ADMA)	1.71605e-05	9.20091e-05	0.33625	0.239955	0.0404667	0.158295
Amino Acid	Urea cycle; Arginine and Proline Metabolism	homocitrulline	0.638615	0.45943	0.502263	0.304234	0.538829	0.419189
Amino Acid	Urea cycle; Arginine and Proline Metabolism	N-acetylarginine	0.631429	0.456571	0.366104	0.251356	0.306957	0.349662
Amino Acid	Urea cycle; Arginine and Proline Metabolism	N-acetylproline	0.484304	0.392092	0.932462	0.446406	0.675055	0.461486
Amino Acid	Urea cycle; Arginine and Proline Metabolism	N-alpha-acetylornithine	0.745599	0.498532	0.75001	0.390132	0.107683	0.24481
Amino Acid	Urea cycle; Arginine and Proline Metabolism	N-delta-acetylornithine	0.867301	0.534621	0.014788	0.0533272	0.729969	0.477026
Amino Acid	Urea cycle; Arginine and Proline Metabolism	N-monomethylarginine	6.72363e-06	4.06521e-05	0.678405	0.367108	0.115075	0.247441
Amino Acid	Urea cycle; Arginine and Proline Metabolism	ornithine	0.127539	0.151544	0.101125	0.127286	0.34715	0.368786
Amino Acid	Urea cycle; Arginine and Proline Metabolism	proline	0.320674	0.299495	0.0322617	0.0752421	0.216996	0.32208
Amino Acid	Urea cycle; Arginine and Proline Metabolism	trans-4-hydroxyproline	0.930814	0.549988	0.089866	0.12143	0.732558	0.477595
Amino Acid	Urea cycle; Arginine and Proline Metabolism	urea	0.331511	0.304784	0.980915	0.453522	0.0907126	0.226972
Carbohydrate	Advanced Glycation End-product	N6-carboxymethyllysine	0.157285	0.176884	0.0976521	0.127077	0.0691823	0.204406
Carbohydrate	Aminosugar Metabolism	erythronate*	0.00570798	0.0121957	0.218565	0.186934	0.00125922	0.0382156
Carbohydrate	Aminosugar Metabolism	N-acetylglucosamine/N-acetylgalactosamine	0.0265973	0.042944	0.161034	0.157152	0.46249	0.392773
Carbohydrate	Aminosugar Metabolism	N-acetylglucosaminylasparagine	0.492278	0.39517	0.573915	0.329292	0.361852	0.368786
Carbohydrate	Aminosugar Metabolism	N-acetylneuraminate	0.282855	0.271549	0.765651	0.392905	0.567276	0.424666
Carbohydrate	Disaccharides and Oligosaccharides	lactose	0.284753	0.272451	0.953871	0.447478	0.318137	0.354848
Carbohydrate	Fructose, Mannose and Galactose Metabolism	fructose	0.00284076	0.00684115	0.143093	0.149495	0.233553	0.322713
Carbohydrate	Fructose, Mannose and Galactose Metabolism	galactonate	0.449012	0.374696	0.233447	0.195071	0.880177	0.52684
Carbohydrate	Fructose, Mannose and Galactose Metabolism	mannitol/sorbitol	1.60179e-09	3.11997e-08	0.000333964	0.00528471	0.00807586	0.0801268
Carbohydrate	Fructose, Mannose and Galactose Metabolism	mannose	0.0893437	0.114364	0.0241694	0.06344	0.0977692	0.238191
Carbohydrate	Fructose, Mannose and Galactose Metabolism	mannose-6-phosphate	0.00146572	0.00408346	0.457342	0.288133	0.0676465	0.204406
Carbohydrate	Glycogen Metabolism	maltose	0.124628	0.148804	0.869329	0.428354	0.877689	0.526486
Carbohydrate	Glycolysis, Gluconeogenesis, and Pyruvate Metabolism	2,3-diphosphoglycerate	0.14079	0.161976	0.000384142	0.00548263	0.0198315	0.114068
Carbohydrate	Glycolysis, Gluconeogenesis, and Pyruvate Metabolism	2-phosphoglycerate	0.1899	0.204408	0.0747511	0.113233	0.5585	0.423079
Carbohydrate	Glycolysis, Gluconeogenesis, and Pyruvate Metabolism	3-phosphoglycerate	0.00215937	0.00562959	0.147049	0.14991	0.631555	0.44632
Carbohydrate	Glycolysis, Gluconeogenesis, and Pyruvate Metabolism	dihydroxyacetone phosphate (DHAP)	0.000702381	0.00226812	0.0011449	0.011884	0.0138507	0.092106
Carbohydrate	Glycolysis, Gluconeogenesis, and Pyruvate Metabolism	fructose-6-phosphate	2.72169e-10	7.03109e-09	1.28127e-06	7.31471e-05	3.90961e-05	0.00542913
Carbohydrate	Glycolysis, Gluconeogenesis, and Pyruvate Metabolism	glucose	0.165283	0.18419	0.0390336	0.0830847	0.520112	0.410138
Carbohydrate	Glycolysis, Gluconeogenesis, and Pyruvate Metabolism	glucose 6-phosphate	0.0742195	0.0976431	0.249428	0.199558	0.393122	0.381759
Carbohydrate	Glycolysis, Gluconeogenesis, and Pyruvate Metabolism	glycerate	0.000341146	0.00124286	0.020018	0.0571411	0.516292	0.410138
Carbohydrate	Glycolysis, Gluconeogenesis, and Pyruvate Metabolism	Isobar: fructose 1,6-diphosphate, glucose 1,6-diphosphate, myo-inositol 1,4 or 1,3-diphosphate	0.00681531	0.0141365	4.92566e-05	0.00160688	0.0123845	0.092106
Carbohydrate	Glycolysis, Gluconeogenesis, and Pyruvate Metabolism	lactate	3.80871e-07	3.97877e-06	0.0750605	0.113233	0.262862	0.330341
Carbohydrate	Glycolysis, Gluconeogenesis, and Pyruvate Metabolism	phosphoenolpyruvate (PEP)	3.87798e-05	0.000180656	0.0158796	0.0533272	0.202426	0.317809
Carbohydrate	Glycolysis, Gluconeogenesis, and Pyruvate Metabolism	pyruvate	0.00204478	0.00542787	0.0696847	0.113233	0.301175	0.349662
Carbohydrate	Nucleotide Sugar	UDP-galactose	0.145062	0.165551	0.948722	0.447478	0.966723	0.553589
Carbohydrate	Nucleotide Sugar	UDP-glucose	0.082942	0.107624	0.528089	0.316519	0.576699	0.428258
Carbohydrate	Nucleotide Sugar	UDP-glucuronate	0.645138	0.461784	0.688558	0.370844	0.140619	0.265307
Carbohydrate	Nucleotide Sugar	UDP-N-acetylgalactosamine	0.0683178	0.0914192	0.606071	0.341732	0.397934	0.383748
Carbohydrate	Nucleotide Sugar	UDP-N-acetylglucosamine	0.70485	0.482643	0.2427	0.197334	0.980589	0.555466
Carbohydrate	Pentose Metabolism	arabitol/xylitol	2.54084e-06	1.80507e-05	0.00140951	0.0134114	0.0083211	0.0801268
Carbohydrate	Pentose Metabolism	arabonate/xylonate	0.598679	0.444172	0.115389	0.135515	0.831829	0.511523
Carbohydrate	Pentose Metabolism	ribitol	9.02561e-07	8.015e-06	0.00184544	0.0150508	0.0256705	0.134427
Carbohydrate	Pentose Metabolism	ribonate	5.16042e-05	0.00022913	0.299126	0.223461	0.283642	0.344118
Carbohydrate	Pentose Metabolism	ribulose/xylulose	0.890861	0.544066	0.586516	0.333894	0.997575	0.555466
Carbohydrate	Pentose Phosphate Pathway	6-phosphogluconate	0.202098	0.215094	0.790903	0.403146	0.444619	0.392773
Carbohydrate	Pentose Phosphate Pathway	ribulose/xylulose 5-phosphate	0.0808304	0.105766	0.0694595	0.113233	0.0285569	0.134427
Carbohydrate	Pentose Phosphate Pathway	sedoheptulose-7-phosphate	3.53224e-11	1.43393e-09	1.09743e-06	7.31471e-05	7.61728e-05	0.0070519
Cofactors and Vitamins	Ascorbate and Aldarate Metabolism	gulonate*	0.702274	0.48204	0.288356	0.221712	0.984295	0.555466
Cofactors and Vitamins	Ascorbate and Aldarate Metabolism	threonate	0.112974	0.138977	0.00469422	0.028972	0.387572	0.378071
Cofactors and Vitamins	Biotin Metabolism	biotin	0.780344	0.512498	0.0876807	0.121223	0.590507	0.433871
Cofactors and Vitamins	Hemoglobin and Porphyrin Metabolism	biliverdin	0.737281	0.496475	0.0564286	0.101464	0.230492	0.32208
Cofactors and Vitamins	Hemoglobin and Porphyrin Metabolism	heme	0.930939	0.549988	0.662111	0.36107	0.00894359	0.0801268
Cofactors and Vitamins	Nicotinate and Nicotinamide Metabolism	1-methylnicotinamide	0.0281029	0.0448651	0.00176258	0.0150508	0.970739	0.554745
Cofactors and Vitamins	Nicotinate and Nicotinamide Metabolism	nicotinamide	0.00197825	0.00530337	0.519737	0.312616	0.515388	0.410138
Cofactors and Vitamins	Nicotinate and Nicotinamide Metabolism	nicotinamide adenine dinucleotide (NAD+)	0.0684031	0.0914192	0.802213	0.40529	0.725588	0.477026
Cofactors and Vitamins	Nicotinate and Nicotinamide Metabolism	nicotinamide ribonucleotide (NMN)	0.44778	0.374696	0.572679	0.329292	0.542383	0.420775
Cofactors and Vitamins	Nicotinate and Nicotinamide Metabolism	nicotinamide riboside	1.86808e-05	9.83058e-05	0.00769068	0.0373666	0.341661	0.368786
Cofactors and Vitamins	Nicotinate and Nicotinamide Metabolism	nicotinate adenine dinucleotide (NAAD+)	0.00336435	0.00796704	0.0458087	0.0886051	0.0458087	0.165571
Cofactors and Vitamins	Nicotinate and Nicotinamide Metabolism	nicotinate ribonucleoside	0.0013629	0.00387293	0.123184	0.137893	0.123184	0.251004
Cofactors and Vitamins	Nicotinate and Nicotinamide Metabolism	nicotinic acid mononucleotide (NaMN)	2.33034e-13	3.31105e-11	0.737124	0.385191	0.944922	0.552053
Cofactors and Vitamins	Nicotinate and Nicotinamide Metabolism	trigonelline (N'-methylnicotinate)	0.332489	0.304784	0.0233142	0.0619068	0.2595	0.327598
Cofactors and Vitamins	Pantothenate and CoA Metabolism	pantothenate	0.0118437	0.0227407	0.726394	0.381329	0.628458	0.445733
Cofactors and Vitamins	Riboflavin Metabolism	riboflavin (Vitamin B2)	0.414987	0.356974	0.0984967	0.127077	0.565605	0.424559
Cofactors and Vitamins	Thiamine Metabolism	thiamin (Vitamin B1)	0.878097	0.540104	0.396841	0.264976	0.448633	0.392773
Cofactors and Vitamins	Tocopherol Metabolism	alpha-tocopherol	0.916309	0.548963	0.785696	0.401388	0.0582698	0.187919
Cofactors and Vitamins	Vitamin B6 Metabolism	pyridoxal	0.211873	0.224366	0.0104244	0.0428194	0.0723719	0.209376
Cofactors and Vitamins	Vitamin B6 Metabolism	pyridoxal phosphate	1.21161e-06	9.56394e-06	0.56638	0.32753	0.417249	0.388872
Cofactors and Vitamins	Vitamin B6 Metabolism	pyridoxamine	0.325376	0.301179	0.00921201	0.0412478	0.0534655	0.178905
Cofactors and Vitamins	Vitamin B6 Metabolism	pyridoxate	0.519329	0.412227	0.235104	0.195229	0.505782	0.407837
Cofactors and Vitamins	Vitamin B6 Metabolism	pyridoxine (Vitamin B6)	0.62699	0.455496	0.0170102	0.0547101	0.872569	0.525685
Cofactors and Vitamins	Vitamin B6 Metabolism	pyridoxine phosphate	0.240984	0.2423	0.0374666	0.0814839	0.282695	0.344118
Energy	Oxidative Phosphorylation	acetylphosphate	0.0148916	0.026783	0.054241	0.099091	0.612021	0.43922
Energy	Oxidative Phosphorylation	phosphate	0.0406658	0.0611427	0.070969	0.113233	0.270483	0.33687
Energy	TCA Cycle	2-methylcitrate/homocitrate	0.245881	0.245164	0.179517	0.169398	0.726976	0.477026
Energy	TCA Cycle	aconitate [cis or trans]	0.609021	0.444897	0.128855	0.14215	0.992968	0.555466
Energy	TCA Cycle	alpha-ketoglutarate	9.35462e-05	0.00039676	0.00310554	0.0211066	0.156241	0.27464
Energy	TCA Cycle	citrate	0.133313	0.154626	0.0186136	0.0571411	0.877082	0.526486
Energy	TCA Cycle	fumarate	4.71931e-08	5.83079e-07	0.210931	0.184371	0.00810148	0.0801268
Energy	TCA Cycle	malate	2.41818e-09	4.0422e-08	0.210938	0.184371	0.0336416	0.14599
Energy	TCA Cycle	succinate	9.90938e-05	0.000414109	0.280537	0.217697	0.289786	0.346424
Energy	TCA Cycle	succinylcarnitine (C4-DC)	0.908001	0.546095	0.391715	0.263092	0.653398	0.459418
Energy	TCA Cycle	tricarballylate	0.598662	0.444172	0.813122	0.408994	0.960459	0.553261
Lipid	Carnitine Metabolism	carnitine	0.996925	0.568338	0.00464781	0.028972	0.464881	0.392773
Lipid	Carnitine Metabolism	deoxycarnitine	0.32145	0.299495	0.954486	0.447478	0.354648	0.368786
Lipid	Ceramides	ceramide (d16:1/24:1, d18:1/22:1)*	0.811089	0.521043	0.930329	0.44632	0.0768239	0.213107
Lipid	Ceramides	ceramide (d18:1/14:0, d16:1/16:0)*	3.85837e-05	0.000180656	0.14849	0.15004	0.0521548	0.178905
Lipid	Ceramides	ceramide (d18:1/17:0, d17:1/18:0)*	0.11516	0.141056	0.185406	0.173157	0.0263827	0.134427
Lipid	Ceramides	ceramide (d18:1/20:0, d16:1/22:0, d20:1/18:0)*	0.471194	0.386991	0.242824	0.197334	0.00220175	0.0509582
Lipid	Diacylglycerol	diacylglycerol (16:1/18:2 [2], 16:0/18:3 [1])*	0.000284357	0.00104942	0.751705	0.390132	0.751705	0.485519
Lipid	Diacylglycerol	oleoyl-oleoyl-glycerol (18:1/18:1) [2]*	0.0177187	0.0310809	0.23406	0.195071	0.51777	0.410138
Lipid	Diacylglycerol	palmitoyl-arachidonoyl-glycerol (16:0/20:4) [1]*	0.000141282	0.000542539	0.918566	0.443149	0.481159	0.400132
Lipid	Diacylglycerol	palmitoyl-arachidonoyl-glycerol (16:0/20:4) [2]*	2.45775e-06	1.80507e-05	0.956256	0.447478	0.328628	0.360754
Lipid	Diacylglycerol	palmitoyl-linolenoyl-glycerol (16:0/18:3) [2]*	0.0704687	0.0935749	0.0704687	0.113233	0.0704687	0.206015
Lipid	Diacylglycerol	palmitoyl-oleoyl-glycerol (16:0/18:1) [2]*	6.23501e-11	2.21475e-09	0.0429878	0.0847423	0.0429878	0.16355
Lipid	Diacylglycerol	stearoyl-arachidonoyl-glycerol (18:0/20:4) [1]*	0.00275674	0.00669557	0.117603	0.136942	0.117603	0.247441
Lipid	Diacylglycerol	stearoyl-arachidonoyl-glycerol (18:0/20:4) [2]*	0.000678122	0.00221496	0.238293	0.196702	0.238293	0.322793
Lipid	Diacylglycerol	stearoyl-linoleoyl-glycerol (18:0/18:2) [2]*	0.00219106	0.00566028	0.238601	0.196702	0.357652	0.368786
Lipid	Endocannabinoid	linoleoyl ethanolamide	0.000114716	0.000465698	0.207694	0.183122	0.207694	0.320463
Lipid	Endocannabinoid	oleoyl ethanolamide	0.00148648	0.0041011	0.633624	0.347228	0.136954	0.262053
Lipid	Endocannabinoid	palmitoyl ethanolamide	0.016902	0.0298324	0.138565	0.147401	0.568871	0.424716
Lipid	Endocannabinoid	stearoyl ethanolamide	0.0212968	0.0362389	0.186534	0.173157	0.662086	0.461486
Lipid	Fatty Acid Metabolism (Acyl Choline)	oleoylcholine	2.26665e-05	0.000114805	0.430529	0.278336	0.176303	0.291459
Lipid	Fatty Acid Metabolism (Acyl Choline)	palmitoylcholine	0.00264264	0.00653005	0.152012	0.152251	0.960923	0.553261
Lipid	Fatty Acid Metabolism (Acyl Choline)	stearoylcholine*	0.232795	0.237961	0.190032	0.174279	0.365806	0.368786
Lipid	Fatty Acid Metabolism (also BCAA Metabolism)	butyrylcarnitine (C4)	0.816558	0.521281	0.0407405	0.0838146	0.396439	0.383638
Lipid	Fatty Acid Metabolism (also BCAA Metabolism)	methylmalonate (MMA)	0.45095	0.374696	0.977767	0.453522	0.989793	0.555466
Lipid	Fatty Acid Metabolism (also BCAA Metabolism)	propionylcarnitine (C3)	0.982924	0.564276	0.0104336	0.0428194	0.415965	0.388872
Lipid	Fatty Acid Metabolism(Acyl Carnitine)	3-hydroxybutyrylcarnitine (1)	0.849059	0.529115	0.366536	0.251356	0.239962	0.322793
Lipid	Fatty Acid Metabolism(Acyl Carnitine)	3-hydroxybutyrylcarnitine (2)	0.81227	0.521043	0.311264	0.226526	0.348087	0.368786
Lipid	Fatty Acid Metabolism(Acyl Carnitine)	acetylcarnitine (C2)	0.229412	0.236202	0.01042	0.0428194	0.520246	0.410138
Lipid	Fatty Acid Metabolism(Acyl Carnitine)	adrenoylcarnitine (C22:4)*	0.0577523	0.0808445	0.00587346	0.0341995	0.964321	0.553354
Lipid	Fatty Acid Metabolism(Acyl Carnitine)	arachidonoylcarnitine (C20:4)	0.000780636	0.00243772	0.0569579	0.101499	0.321432	0.357089
Lipid	Fatty Acid Metabolism(Acyl Carnitine)	arachidoylcarnitine (C20)*	0.0340141	0.0528184	0.0970778	0.127077	0.108419	0.24481
Lipid	Fatty Acid Metabolism(Acyl Carnitine)	behenoylcarnitine (C22)*	0.392502	0.34319	0.139783	0.147401	0.938924	0.551311
Lipid	Fatty Acid Metabolism(Acyl Carnitine)	cerotoylcarnitine (C26)*	0.0495876	0.0715293	0.0896409	0.12143	0.019816	0.114068
Lipid	Fatty Acid Metabolism(Acyl Carnitine)	cis-4-decenoylcarnitine (C10:1)	0.653504	0.462773	0.00702886	0.0373279	0.333563	0.363299
Lipid	Fatty Acid Metabolism(Acyl Carnitine)	decanoylcarnitine (C10)	0.118058	0.143369	0.0421899	0.0847423	0.0734487	0.2103
Lipid	Fatty Acid Metabolism(Acyl Carnitine)	dihomo-linolenoylcarnitine (20:3n3 or 6)*	0.00103877	0.00307485	0.0760655	0.113233	0.353559	0.368786
Lipid	Fatty Acid Metabolism(Acyl Carnitine)	dihomo-linoleoylcarnitine (C20:2)*	0.00771824	0.0155552	0.000880708	0.009577	0.242631	0.322793
Lipid	Fatty Acid Metabolism(Acyl Carnitine)	docosapentaenoylcarnitine (C22:5n3)*	0.00357814	0.00819997	0.0864832	0.121161	0.246483	0.322793
Lipid	Fatty Acid Metabolism(Acyl Carnitine)	eicosenoylcarnitine (C20:1)*	0.0242987	0.0408338	0.00698268	0.0373279	0.276239	0.340962
Lipid	Fatty Acid Metabolism(Acyl Carnitine)	hexanoylcarnitine (C6)	0.515764	0.410544	0.0151473	0.0533272	0.126727	0.252148
Lipid	Fatty Acid Metabolism(Acyl Carnitine)	laurylcarnitine (C12)	0.0217697	0.0368231	0.0348077	0.0786992	0.149545	0.267958
Lipid	Fatty Acid Metabolism(Acyl Carnitine)	linolenoylcarnitine (C18:3)*	0.0458048	0.0674421	0.00828541	0.0386131	0.06737	0.204406
Lipid	Fatty Acid Metabolism(Acyl Carnitine)	linoleoylcarnitine (C18:2)*	0.000216701	0.00081026	0.00225583	0.0166173	0.069131	0.204406
Lipid	Fatty Acid Metabolism(Acyl Carnitine)	margaroylcarnitine*	0.000506147	0.00169213	0.361122	0.251297	0.127103	0.252148
Lipid	Fatty Acid Metabolism(Acyl Carnitine)	myristoleoylcarnitine (C14:1)*	2.30281e-05	0.000114805	0.00599989	0.0341995	0.0529908	0.178905
Lipid	Fatty Acid Metabolism(Acyl Carnitine)	myristoylcarnitine (C14)	0.000134503	0.000530856	0.306041	0.226276	0.471878	0.39594
Lipid	Fatty Acid Metabolism(Acyl Carnitine)	octanoylcarnitine (C8)	0.273288	0.26415	0.0219427	0.0603711	0.256152	0.326477
Lipid	Fatty Acid Metabolism(Acyl Carnitine)	oleoylcarnitine (C18:1)	0.000653209	0.00215839	0.0339349	0.0774932	0.248404	0.322793
Lipid	Fatty Acid Metabolism(Acyl Carnitine)	palmitoleoylcarnitine (C16:1)*	0.00416662	0.00932302	0.0433258	0.0847423	0.80519	0.501407
Lipid	Fatty Acid Metabolism(Acyl Carnitine)	palmitoylcarnitine (C16)	3.07816e-05	0.000148257	0.543826	0.32007	0.579875	0.429397
Lipid	Fatty Acid Metabolism(Acyl Carnitine)	pentadecanoylcarnitine (C15)*	0.000375701	0.00133453	0.703774	0.372165	0.242764	0.322793
Lipid	Fatty Acid Metabolism(Acyl Carnitine)	stearoylcarnitine (C18)	0.194248	0.208299	0.97393	0.452964	0.812731	0.502945
Lipid	Fatty Acid Synthesis	2-methylmalonylcarnitine (C4-DC)	0.641213	0.460134	0.58081	0.332413	0.435314	0.392478
Lipid	Fatty Acid Synthesis	malonylcarnitine	0.383107	0.33915	0.72162	0.379696	0.740704	0.480649
Lipid	Fatty Acid, Dicarboxylate	2-hydroxyglutarate	8.20503e-08	9.71507e-07	0.311481	0.226526	0.522141	0.410138
Lipid	Fatty Acid, Dicarboxylate	adipate	0.458372	0.378649	0.363855	0.251356	0.670597	0.461486
Lipid	Fatty Acid, Dicarboxylate	azelate (nonanedioate)	0.23657	0.240953	0.52021	0.312616	0.607127	0.439112
Lipid	Fatty Acid, Monohydroxy	13-HODE + 9-HODE	0.002399	0.00603295	0.428248	0.278336	0.0316149	0.14301
Lipid	Fatty Acid, Monohydroxy	2-hydroxystearate	0.00132284	0.00379707	0.560108	0.327124	0.0345162	0.146022
Lipid	Glycerolipid Metabolism	glycerol	5.00984e-07	4.74548e-06	0.174998	0.167206	0.0744212	0.21054
Lipid	Glycerolipid Metabolism	glycerol 3-phosphate	0.0250897	0.0416943	0.407199	0.26875	0.658022	0.460338
Lipid	Glycerolipid Metabolism	glycerophosphoglycerol	5.51525e-10	1.20559e-08	0.172999	0.16599	0.11687	0.247441
Lipid	Inositol Metabolism	inositol 1-phosphate (I1P)	0.00083257	0.00251692	0.904015	0.438582	0.904015	0.536484
Lipid	Inositol Metabolism	myo-inositol	0.258587	0.253387	0.3826	0.259017	0.601672	0.437445
Lipid	Long Chain Fatty Acid	10-heptadecenoate (17:1n7)	0.172211	0.189678	0.144045	0.149495	0.720686	0.477026
Lipid	Long Chain Fatty Acid	10-nonadecenoate (19:1n9)	0.120577	0.145389	0.18287	0.171851	0.794053	0.497821
Lipid	Long Chain Fatty Acid	eicosenoate (20:1)	0.122636	0.147043	0.0275895	0.0677452	0.203685	0.317809
Lipid	Long Chain Fatty Acid	erucate (22:1n9)	0.106847	0.133169	0.588207	0.333894	0.411685	0.386279
Lipid	Long Chain Fatty Acid	oleate/vaccenate (18:1)	0.0439057	0.0656435	0.0762494	0.113233	0.22555	0.32208
Lipid	Lysolipid	1-arachidonoyl-GPC (20:4n6)*	0.212389	0.224366	0.491567	0.30074	0.916675	0.541682
Lipid	Lysolipid	1-arachidonoyl-GPE (20:4n6)*	0.75308	0.501176	0.0269978	0.0670126	0.0774984	0.213107
Lipid	Lysolipid	1-arachidonoyl-GPI (20:4)*	0.0199752	0.0344177	0.0199752	0.0571411	0.0199752	0.114068
Lipid	Lysolipid	1-linoleoyl-GPC (18:2)	2.28837e-06	1.75753e-05	0.114781	0.135515	0.954788	0.553261
Lipid	Lysolipid	1-linoleoyl-GPE (18:2)*	0.52335	0.414261	0.366207	0.251356	0.77045	0.49304
Lipid	Lysolipid	1-oleoyl-GPC (18:1)	2.4172e-08	3.27092e-07	9.41577e-05	0.00268771	0.000830756	0.0362988
Lipid	Lysolipid	1-oleoyl-GPE (18:1)	0.00420812	0.00934232	0.54232	0.32007	0.908689	0.538108
Lipid	Lysolipid	1-oleoyl-GPI (18:1)*	0.000141109	0.000542539	0.222363	0.188768	0.222363	0.32208
Lipid	Lysolipid	1-oleoyl-GPS (18:1)	0.120744	0.145389	0.120744	0.136956	0.120744	0.250258
Lipid	Lysolipid	1-palmitoyl-GPC (16:0)	9.73805e-08	1.1069e-06	0.000581705	0.00737985	0.000634922	0.0352987
Lipid	Lysolipid	1-palmitoyl-GPE (16:0)	4.09527e-07	4.01293e-06	0.356389	0.250151	0.366485	0.368786
Lipid	Lysolipid	1-palmitoyl-GPG (16:0)*	0.00231085	0.00590192	0.0833788	0.118262	0.0833788	0.220543
Lipid	Lysolipid	1-stearoyl-GPC (18:0)	3.11138e-06	2.00945e-05	0.0013019	0.0129261	0.00137598	0.0382156
Lipid	Lysolipid	1-stearoyl-GPE (18:0)	2.51399e-06	1.80507e-05	0.465754	0.291394	0.465276	0.392773
Lipid	Lysolipid	1-stearoyl-GPG (18:0)	0.0160566	0.0286968	0.565308	0.32753	0.565308	0.424559
Lipid	Lysolipid	1-stearoyl-GPI (18:0)	0.00349334	0.00807072	0.431475	0.278336	0.671957	0.461486
Lipid	Lysolipid	1-stearoyl-GPS (18:0)*	0.0343551	0.0530579	0.0502013	0.0939662	0.0491444	0.172772
Lipid	Lysolipid	2-palmitoyl-GPC (16:0)*	7.67933e-06	4.54631e-05	0.0190949	0.0571411	0.00414045	0.0766626
Lipid	Lysoplasmalogen	1-(1-enyl-oleoyl)-2-linoleoyl-GPE (P-18:1/18:2)*	0.317889	0.29912	0.433234	0.27861	0.37235	0.371291
Lipid	Lysoplasmalogen	1-(1-enyl-oleoyl)-2-oleoyl-GPE (P-18:1/18:1)*	0.408834	0.354202	0.19667	0.176816	0.300108	0.349662
Lipid	Lysoplasmalogen	1-(1-enyl-oleoyl)-GPE (P-18:1)*	0.832314	0.52443	0.634065	0.347228	0.780269	0.495847
Lipid	Lysoplasmalogen	1-(1-enyl-palmitoyl)-GPC (P-16:0)*	0.0470376	0.0689001	0.0158676	0.0533272	0.273536	0.339152
Lipid	Lysoplasmalogen	1-(1-enyl-palmitoyl)-GPE (P-16:0)*	0.903503	0.545331	0.0998482	0.127286	0.29437	0.346424
Lipid	Lysoplasmalogen	1-(1-enyl-stearoyl)-GPE (P-18:0)*	0.766032	0.505064	0.50462	0.304852	0.991994	0.555466
Lipid	Medium Chain Fatty Acid	caproate (6:0)	0.00952889	0.0188043	0.49178	0.30074	0.987135	0.555466
Lipid	Medium Chain Fatty Acid	caprylate (8:0)	0.597084	0.444172	0.697537	0.372165	0.486697	0.402117
Lipid	Medium Chain Fatty Acid	heptanoate (7:0)	0.447392	0.374696	0.682656	0.368535	0.786285	0.497443
Lipid	Mevalonate Metabolism	3-hydroxy-3-methylglutarate	0.345943	0.314078	0.18808	0.173885	0.526935	0.412246
Lipid	Monoacylglycerol	1-oleoylglycerol (18:1)	0.000389722	0.00135057	0.14639	0.14991	0.728578	0.477026
Lipid	Phosphatidylserine (PS)	1-stearoyl-2-arachidonoyl-GPS (18:0/20:4)	0.525124	0.414511	0.108093	0.132709	0.801199	0.500043
Lipid	Phosphatidylserine (PS)	1-stearoyl-2-oleoyl-GPS (18:0/18:1)	0.00661659	0.0138252	0.56654	0.32753	0.315421	0.354494
Lipid	Phospholipid Metabolism	1,2-dilinoleoyl-GPC (18:2/18:2)	0.677918	0.471482	0.000783531	0.00894629	0.0131621	0.092106
Lipid	Phospholipid Metabolism	1,2-dilinoleoyl-GPE (18:2/18:2)*	0.668745	0.469226	0.295548	0.222742	0.458994	0.392773
Lipid	Phospholipid Metabolism	1,2-dioleoyl-GPE (18:1/18:1)	0.608513	0.444897	0.703741	0.372165	0.128172	0.252465
Lipid	Phospholipid Metabolism	1,2-dipalmitoyl-GPC (16:0/16:0)	0.127989	0.151544	0.0670703	0.11255	0.719691	0.477026
Lipid	Phospholipid Metabolism	1,2-dipalmitoyl-GPE (16:0/16:0)*	0.0621607	0.0849238	0.0573371	0.101499	0.0080288	0.0801268
Lipid	Phospholipid Metabolism	1-linoleoyl-2-arachidonoyl-GPC (18:2/20:4n6)*	0.390858	0.343018	0.00215491	0.0164031	0.342905	0.368786
Lipid	Phospholipid Metabolism	1-linoleoyl-2-linolenoyl-GPC (18:2/18:3)*	0.0493907	0.0715293	0.189637	0.174279	0.0976973	0.238191
Lipid	Phospholipid Metabolism	1-oleoyl-2-arachidonoyl-GPE (18:1/20:4)*	0.299931	0.284965	0.425125	0.277374	0.447796	0.392773
Lipid	Phospholipid Metabolism	1-oleoyl-2-linoleoyl-GPC (18:1/18:2)*	0.673733	0.470403	0.00854415	0.0390226	0.707245	0.472176
Lipid	Phospholipid Metabolism	1-oleoyl-2-linoleoyl-GPE (18:1/18:2)*	0.796405	0.515521	0.121147	0.136956	0.221222	0.32208
Lipid	Phospholipid Metabolism	1-palmitoyl-2-alpha-linolenoyl-GPC (16:0/18:3n3)*	0.000979882	0.00293108	0.297473	0.223455	0.0373247	0.154721
Lipid	Phospholipid Metabolism	1-palmitoyl-2-arachidonoyl-GPA (16:0/20:4)*	0.595573	0.444172	0.67175	0.36437	0.110512	0.245542
Lipid	Phospholipid Metabolism	1-palmitoyl-2-arachidonoyl-GPC (16:0/20:4n6)	0.476096	0.388769	0.0487987	0.0920957	0.213451	0.32208
Lipid	Phospholipid Metabolism	1-palmitoyl-2-arachidonoyl-GPE (16:0/20:4)*	0.780914	0.512498	0.101446	0.127286	0.283737	0.344118
Lipid	Phospholipid Metabolism	1-palmitoyl-2-arachidonoyl-GPI (16:0/20:4)*	0.598389	0.444172	0.614286	0.343916	0.455828	0.392773
Lipid	Phospholipid Metabolism	1-palmitoyl-2-linoleoyl-GPA (16:0/18:2)*	0.826787	0.5237	0.940894	0.447478	0.0573838	0.187919
Lipid	Phospholipid Metabolism	1-palmitoyl-2-linoleoyl-GPC (16:0/18:2)	0.693907	0.480731	0.0265477	0.0666198	0.946151	0.552053
Lipid	Phospholipid Metabolism	1-palmitoyl-2-linoleoyl-GPE (16:0/18:2)	0.0262839	0.042944	0.153117	0.152688	0.403717	0.385311
Lipid	Phospholipid Metabolism	1-palmitoyl-2-linoleoyl-GPI (16:0/18:2)	0.729203	0.493374	0.453247	0.287508	0.587563	0.432853
Lipid	Phospholipid Metabolism	1-palmitoyl-2-oleoyl-GPC (16:0/18:1)	0.026477	0.042944	0.0746388	0.113233	0.9485	0.552263
Lipid	Phospholipid Metabolism	1-palmitoyl-2-oleoyl-GPE (16:0/18:1)	0.00937416	0.0186283	0.43434	0.27861	0.481196	0.400132
Lipid	Phospholipid Metabolism	1-palmitoyl-2-oleoyl-GPG (16:0/18:1)	2.50747e-05	0.000122853	0.0853196	0.120268	0.497186	0.403757
Lipid	Phospholipid Metabolism	1-palmitoyl-2-oleoyl-GPI (16:0/18:1)*	0.606302	0.444897	0.24972	0.199558	0.422879	0.390707
Lipid	Phospholipid Metabolism	1-palmitoyl-2-palmitoleoyl-GPC (16:0/16:1)*	0.000802814	0.00247973	0.0103466	0.0428194	0.164304	0.280358
Lipid	Phospholipid Metabolism	1-palmitoyl-2-stearoyl-GPC (16:0/18:0)	0.664437	0.467487	0.100909	0.127286	0.0619633	0.19556
Lipid	Phospholipid Metabolism	1-palmitoyl-2-stearoyl-GPE (16:0/18:0)*	0.0138409	0.0255399	0.354546	0.250151	0.008786	0.0801268
Lipid	Phospholipid Metabolism	1-stearoyl-2-arachidonoyl-GPC (18:0/20:4)	0.664621	0.467487	0.144678	0.149495	0.0197508	0.114068
Lipid	Phospholipid Metabolism	1-stearoyl-2-arachidonoyl-GPE (18:0/20:4)	0.405964	0.35279	0.195022	0.176726	0.438257	0.392478
Lipid	Phospholipid Metabolism	1-stearoyl-2-arachidonoyl-GPI (18:0/20:4)	0.976274	0.564276	0.71322	0.376143	0.372985	0.371291
Lipid	Phospholipid Metabolism	1-stearoyl-2-linoleoyl-GPA (18:0/18:2)*	0.818144	0.521281	0.845641	0.420717	0.174804	0.290711
Lipid	Phospholipid Metabolism	1-stearoyl-2-linoleoyl-GPC (18:0/18:2)*	0.695292	0.480731	0.115719	0.135515	0.493339	0.40299
Lipid	Phospholipid Metabolism	1-stearoyl-2-linoleoyl-GPE (18:0/18:2)*	0.0518809	0.0737148	0.500643	0.304059	0.198787	0.317297
Lipid	Phospholipid Metabolism	1-stearoyl-2-linoleoyl-GPI (18:0/18:2)	0.00273405	0.00669557	0.144274	0.149495	0.789782	0.497821
Lipid	Phospholipid Metabolism	1-stearoyl-2-linoleoyl-GPS (18:0/18:2)	0.00692715	0.0142644	0.322037	0.23346	0.249882	0.322793
Lipid	Phospholipid Metabolism	1-stearoyl-2-oleoyl-GPC (18:0/18:1)	0.000430269	0.00146686	0.166304	0.160241	0.353352	0.368786
Lipid	Phospholipid Metabolism	1-stearoyl-2-oleoyl-GPE (18:0/18:1)	0.0013169	0.00379707	0.395635	0.264946	0.345446	0.368786
Lipid	Phospholipid Metabolism	choline	0.573243	0.438921	0.137949	0.147401	0.489375	0.402117
Lipid	Phospholipid Metabolism	choline phosphate	4.07846e-10	9.6581e-09	0.0167972	0.0547101	0.0206272	0.114577
Lipid	Phospholipid Metabolism	cytidine 5'-diphosphocholine	5.46046e-06	3.37325e-05	0.0422977	0.0847423	0.0892045	0.226972
Lipid	Phospholipid Metabolism	cytidine-5'-diphosphoethanolamine	2.81333e-06	1.94991e-05	0.0703965	0.113233	0.453728	0.392773
Lipid	Phospholipid Metabolism	glycerophosphoethanolamine	0.178376	0.194958	0.936926	0.44667	0.408474	0.385873
Lipid	Phospholipid Metabolism	glycerophosphoinositol*	5.57416e-12	3.33388e-10	0.765146	0.392905	0.935419	0.551311
Lipid	Phospholipid Metabolism	glycerophosphorylcholine (GPC)	0.0389283	0.0591563	0.0963056	0.127077	0.25626	0.326477
Lipid	Phospholipid Metabolism	phosphoethanolamine	2.5988e-10	7.03109e-09	0.119337	0.136942	0.178335	0.293074
Lipid	Phospholipid Metabolism	trimethylamine N-oxide	0.399445	0.34819	0.000234349	0.00445963	0.248925	0.322793
Lipid	Plasmalogen	1-(1-enyl-palmitoyl)-2-arachidonoyl-GPC (P-16:0/20:4)*	0.551498	0.429104	0.111629	0.135515	0.860837	0.524304
Lipid	Plasmalogen	1-(1-enyl-palmitoyl)-2-arachidonoyl-GPE (P-16:0/20:4)*	0.585281	0.441499	0.0798824	0.116031	0.229578	0.32208
Lipid	Plasmalogen	1-(1-enyl-palmitoyl)-2-linoleoyl-GPC (P-16:0/18:2)*	0.391097	0.343018	0.921312	0.443149	0.0106911	0.0899776
Lipid	Plasmalogen	1-(1-enyl-palmitoyl)-2-linoleoyl-GPE (P-16:0/18:2)*	0.231193	0.237177	0.0731199	0.113233	0.133384	0.258979
Lipid	Plasmalogen	1-(1-enyl-palmitoyl)-2-oleoyl-GPC (P-16:0/18:1)*	0.0959494	0.121723	0.859791	0.424979	0.37768	0.373289
Lipid	Plasmalogen	1-(1-enyl-palmitoyl)-2-oleoyl-GPE (P-16:0/18:1)*	0.928552	0.549988	0.156154	0.154368	0.268568	0.335992
Lipid	Plasmalogen	1-(1-enyl-palmitoyl)-2-palmitoleoyl-GPC (P-16:0/16:1)*	0.0254851	0.0421051	0.13859	0.147401	0.60375	0.43781
Lipid	Plasmalogen	1-(1-enyl-palmitoyl)-2-palmitoyl-GPC (P-16:0/16:0)*	0.371532	0.332006	0.936574	0.44667	0.226202	0.32208
Lipid	Plasmalogen	1-(1-enyl-stearoyl)-2-arachidonoyl-GPE (P-18:0/20:4)*	0.624768	0.45523	0.179018	0.169398	0.355942	0.368786
Lipid	Plasmalogen	1-(1-enyl-stearoyl)-2-linoleoyl-GPE (P-18:0/18:2)*	0.238949	0.241644	0.552894	0.323738	0.092011	0.228165
Lipid	Plasmalogen	1-(1-enyl-stearoyl)-2-oleoyl-GPE (P-18:0/18:1)	0.574583	0.438921	0.0154369	0.0533272	0.0419676	0.161886
Lipid	Polyunsaturated Fatty Acid (n3 and n6)	arachidonate (20:4n6)	0.00262061	0.00653005	0.197828	0.177159	0.0269956	0.134427
Lipid	Polyunsaturated Fatty Acid (n3 and n6)	dihomo-linoleate (20:2n6)	0.678597	0.471482	4.34019e-05	0.00160688	0.901935	0.536396
Lipid	Polyunsaturated Fatty Acid (n3 and n6)	dihomo-linolenate (20:3n3 or n6)	0.00744562	0.015113	0.0787643	0.115298	0.16555	0.280358
Lipid	Polyunsaturated Fatty Acid (n3 and n6)	docosahexaenoate (DHA; 22:6n3)	0.000349126	0.00125583	0.0203769	0.0574473	0.00734665	0.0801268
Lipid	Polyunsaturated Fatty Acid (n3 and n6)	docosapentaenoate (n3 DPA; 22:5n3)	0.00398316	0.00898327	0.0605329	0.103934	0.102418	0.243118
Lipid	Polyunsaturated Fatty Acid (n3 and n6)	docosapentaenoate (n6 DPA; 22:5n6)	0.0199688	0.0344177	0.534344	0.318008	0.403538	0.385311
Lipid	Polyunsaturated Fatty Acid (n3 and n6)	eicosapentaenoate (EPA; 20:5n3)	0.00610815	0.0128574	0.0382768	0.0824607	0.558574	0.423079
Lipid	Polyunsaturated Fatty Acid (n3 and n6)	linoleate (18:2n6)	0.0144825	0.0263813	0.0588311	0.101837	0.108395	0.24481
Lipid	Polyunsaturated Fatty Acid (n3 and n6)	linolenate [alpha or gamma; (18:3n3 or 6)]	0.131404	0.153468	0.112943	0.135515	0.205018	0.318102
Lipid	Polyunsaturated Fatty Acid (n3 and n6)	mead acid (20:3n9)	0.0314385	0.0496324	0.391709	0.263092	0.182963	0.298911
Lipid	Primary Bile Acid Metabolism	chenodeoxycholate	0.829313	0.5237	0.599146	0.338663	0.483908	0.401186
Lipid	Primary Bile Acid Metabolism	cholate	0.498876	0.399339	0.026158	0.0666198	0.506615	0.407837
Lipid	Primary Bile Acid Metabolism	glycochenodeoxycholate	0.435397	0.369163	0.0464005	0.0886051	0.359379	0.368786
Lipid	Primary Bile Acid Metabolism	glycocholate	0.860626	0.532818	0.089632	0.12143	0.438958	0.392478
Lipid	Secondary Bile Acid Metabolism	deoxycholate	0.795438	0.515521	0.273661	0.213286	0.672814	0.461486
Lipid	Secondary Bile Acid Metabolism	glycodeoxycholate	0.762339	0.503798	0.0881204	0.121223	0.55807	0.423079
Lipid	Sphingolipid Metabolism	behenoyl dihydrosphingomyelin (d18:0/22:0)*	0.419716	0.358214	0.293226	0.222537	0.00582553	0.0801268
Lipid	Sphingolipid Metabolism	behenoyl sphingomyelin (d18:1/22:0)*	0.701814	0.48204	0.695201	0.372165	0.519357	0.410138
Lipid	Sphingolipid Metabolism	glycosyl-N-palmitoyl-sphingosine (d18:1/16:0)	0.804203	0.519385	0.0228928	0.061503	0.258415	0.327598
Lipid	Sphingolipid Metabolism	glycosyl-N-stearoyl-sphingosine (d18:1/18:0)	0.252231	0.249743	0.293776	0.222537	0.411174	0.386279
Lipid	Sphingolipid Metabolism	lactosyl-N-nervonoyl-sphingosine (d18:1/24:1)*	1.01832e-06	8.26783e-06	0.186136	0.173157	0.0331742	0.14599
Lipid	Sphingolipid Metabolism	lactosyl-N-palmitoyl-sphingosine (d18:1/16:0)	0.00344948	0.00803472	0.0622255	0.106043	0.0643228	0.200725
Lipid	Sphingolipid Metabolism	lignoceroyl sphingomyelin (d18:1/24:0)	0.672395	0.470403	0.492544	0.30074	0.00871171	0.0801268
Lipid	Sphingolipid Metabolism	myristoyl dihydrosphingomyelin (d18:0/14:0)*	0.564058	0.434385	0.26561	0.208434	0.636929	0.448975
Lipid	Sphingolipid Metabolism	N-behenoyl-sphingadienine (d18:2/22:0)*	0.0596103	0.0830364	0.233653	0.195071	0.619469	0.441532
Lipid	Sphingolipid Metabolism	N-palmitoyl-sphingadienine (d18:2/16:0)*	3.48583e-07	3.80986e-06	0.272344	0.212986	0.119339	0.249206
Lipid	Sphingolipid Metabolism	N-palmitoyl-sphinganine (d18:0/16:0)	0.0264532	0.042944	0.193009	0.175598	0.0166871	0.106865
Lipid	Sphingolipid Metabolism	N-palmitoyl-sphingosine (d18:1/16:0)	0.0107164	0.0210018	0.53065	0.317221	0.305415	0.349662
Lipid	Sphingolipid Metabolism	N-stearoyl-sphingadienine (d18:2/18:0)*	0.369827	0.331525	0.471993	0.292246	0.0137178	0.092106
Lipid	Sphingolipid Metabolism	N-stearoyl-sphinganine (d18:0/18:0)*	0.651542	0.462773	0.293597	0.222537	0.00282481	0.0560387
Lipid	Sphingolipid Metabolism	N-stearoyl-sphingosine (d18:1/18:0)*	0.849021	0.529115	0.0742981	0.113233	0.0319249	0.14301
Lipid	Sphingolipid Metabolism	N-tetracosadienoyl-sphingosine (d18:1/24:2)*	0.60334	0.444172	0.471588	0.292246	0.109492	0.245239
Lipid	Sphingolipid Metabolism	palmitoyl dihydrosphingomyelin (d18:0/16:0)*	0.986588	0.565237	0.775236	0.396932	0.315558	0.354494
Lipid	Sphingolipid Metabolism	palmitoyl sphingomyelin (d18:1/16:0)	0.419769	0.358214	0.146594	0.14991	0.866525	0.524319
Lipid	Sphingolipid Metabolism	sphinganine	1.23576e-05	7.02327e-05	0.909723	0.440133	0.379822	0.374074
Lipid	Sphingolipid Metabolism	sphinganine-1-phosphate	0.171076	0.189161	0.00150619	0.013758	0.164634	0.280358
Lipid	Sphingolipid Metabolism	sphingomyelin (d17:2/16:0, d18:2/15:0)*	0.0244282	0.0408338	0.214393	0.18575	0.555771	0.423079
Lipid	Sphingolipid Metabolism	sphingomyelin (d18:0/18:0, d19:0/17:0)*	0.965401	0.561017	0.854842	0.42345	0.0169302	0.106865
Lipid	Sphingolipid Metabolism	sphingomyelin (d18:0/20:0, d16:0/22:0)*	0.711901	0.485133	0.961906	0.448284	0.00701002	0.0801268
Lipid	Sphingolipid Metabolism	sphingomyelin (d18:1/14:0, d16:1/16:0)*	0.254453	0.2502	0.729603	0.382135	0.0459037	0.165571
Lipid	Sphingolipid Metabolism	sphingomyelin (d18:1/15:0, d16:1/17:0)*	0.787252	0.513103	0.154712	0.153608	0.245923	0.322793
Lipid	Sphingolipid Metabolism	sphingomyelin (d18:1/17:0, d17:1/18:0, d19:1/16:0)	0.483562	0.392092	0.803984	0.40529	0.54894	0.422323
Lipid	Sphingolipid Metabolism	sphingomyelin (d18:1/18:1, d18:2/18:0)	0.282014	0.271549	0.076362	0.113233	0.657112	0.460338
Lipid	Sphingolipid Metabolism	sphingomyelin (d18:1/19:0, d19:1/18:0)*	0.0351794	0.0540374	0.383379	0.259017	0.0347004	0.146022
Lipid	Sphingolipid Metabolism	sphingomyelin (d18:1/20:0, d16:1/22:0)*	0.033535	0.0523605	0.24255	0.197334	0.0581337	0.187919
Lipid	Sphingolipid Metabolism	sphingomyelin (d18:1/20:1, d18:2/20:0)*	0.0875111	0.113036	0.309155	0.226276	0.546647	0.422323
Lipid	Sphingolipid Metabolism	sphingomyelin (d18:1/21:0, d17:1/22:0, d16:1/23:0)*	0.157482	0.176884	0.921777	0.443149	0.231468	0.32208
Lipid	Sphingolipid Metabolism	sphingomyelin (d18:1/22:1, d18:2/22:0, d16:1/24:1)*	0.0512668	0.0735569	0.23238	0.195071	0.305531	0.349662
Lipid	Sphingolipid Metabolism	sphingomyelin (d18:1/22:2, d18:2/22:1, d16:1/24:2)*	0.130756	0.153468	0.217342	0.186586	0.681264	0.461486
Lipid	Sphingolipid Metabolism	sphingomyelin (d18:1/24:1, d18:2/24:0)*	0.444764	0.374696	0.568609	0.327896	0.142334	0.265307
Lipid	Sphingolipid Metabolism	sphingomyelin (d18:1/25:0, d19:0/24:1, d20:1/23:0, d19:1/24:0)*	0.754927	0.501231	0.399168	0.265753	0.0274003	0.134427
Lipid	Sphingolipid Metabolism	sphingomyelin (d18:2/14:0, d18:1/14:1)*	0.584285	0.441499	0.355094	0.250151	0.50434	0.407837
Lipid	Sphingolipid Metabolism	sphingomyelin (d18:2/16:0, d18:1/16:1)*	0.474658	0.388713	0.610918	0.343616	0.0304751	0.141065
Lipid	Sphingolipid Metabolism	sphingomyelin (d18:2/18:1)*	0.562309	0.434215	0.795225	0.403548	0.0806695	0.218302
Lipid	Sphingolipid Metabolism	sphingomyelin (d18:2/21:0, d16:2/23:0)*	0.0143171	0.0262482	0.254559	0.202507	0.00104557	0.0362988
Lipid	Sphingolipid Metabolism	sphingomyelin (d18:2/23:0, d18:1/23:1, d17:1/24:1)*	0.48997	0.394432	0.30872	0.226276	0.0386781	0.155684
Lipid	Sphingolipid Metabolism	sphingomyelin (d18:2/23:1)*	0.295385	0.281675	0.799574	0.404855	0.131734	0.257654
Lipid	Sphingolipid Metabolism	sphingomyelin (d18:2/24:1, d18:1/24:2)*	0.173331	0.190175	0.215555	0.18575	0.678093	0.461486
Lipid	Sphingolipid Metabolism	sphingomyelin (d18:2/24:2)*	0.376763	0.334576	0.662505	0.36107	0.241381	0.322793
Lipid	Sphingolipid Metabolism	sphingosine 1-phosphate	0.70925	0.484488	0.010688	0.0428194	0.0201249	0.114068
Lipid	Sphingolipid Metabolism	stearoyl sphingomyelin (d18:1/18:0)	0.108267	0.13435	0.127614	0.141465	0.973559	0.555214
Lipid	Sphingolipid Metabolism	tricosanoyl sphingomyelin (d18:1/23:0)*	0.452426	0.374827	0.437787	0.279252	0.0534201	0.178905
Lipid	Sterol	4-cholesten-3-one	0.922912	0.549692	0.763968	0.392905	0.429874	0.392058
Lipid	Sterol	7-hydroxycholesterol (alpha or beta)	0.340148	0.310803	0.624185	0.34461	0.897315	0.534794
Lipid	Sterol	beta-sitosterol	0.266977	0.259817	0.830127	0.415716	0.369255	0.370232
Lipid	Sterol	campesterol	0.223952	0.232264	0.138148	0.147401	0.449121	0.392773
Lipid	Sterol	cholesterol	0.238378	0.241644	0.299438	0.223461	0.326918	0.360301
Nucleotide	Purine and Pyrimidine Metabolism	methylphosphate	0.357464	0.323504	0.994394	0.456717	0.0276678	0.134427
Nucleotide	Purine Metabolism, (Hypo)Xanthine/Inosine containing	AICA ribonucleotide	0.000755011	0.0023839	0.00314253	0.0211066	0.0826091	0.220543
Nucleotide	Purine Metabolism, (Hypo)Xanthine/Inosine containing	hypoxanthine	0.039173	0.0592116	0.0185316	0.0571411	0.0685675	0.204406
Nucleotide	Purine Metabolism, (Hypo)Xanthine/Inosine containing	inosine	4.31173e-06	2.7228e-05	0.140069	0.147401	0.0221922	0.120853
Nucleotide	Purine Metabolism, (Hypo)Xanthine/Inosine containing	inosine 5'-monophosphate (IMP)	0.00165204	0.00451402	0.0524946	0.096674	0.0866519	0.224917
Nucleotide	Purine Metabolism, (Hypo)Xanthine/Inosine containing	xanthine	0.00550102	0.011933	0.75433	0.390607	0.62912	0.445733
Nucleotide	Purine Metabolism, Adenine containing	2'-deoxyadenosine 5'-monophosphate	0.0884378	0.113716	0.130047	0.142775	0.887378	0.530008
Nucleotide	Purine Metabolism, Adenine containing	adenine	0.917614	0.548963	0.952665	0.447478	0.0267429	0.134427
Nucleotide	Purine Metabolism, Adenine containing	adenosine	0.0908427	0.115761	0.458018	0.288133	0.0139287	0.092106
Nucleotide	Purine Metabolism, Adenine containing	adenosine 5'-diphosphate (ADP)	0.138709	0.160231	0.542715	0.32007	0.581326	0.429397
Nucleotide	Purine Metabolism, Adenine containing	adenosine 5'-monophosphate (AMP)	0.011504	0.0222567	0.947298	0.447478	0.48823	0.402117
Nucleotide	Purine Metabolism, Adenine containing	adenylosuccinate	0.0122141	0.0232945	0.534752	0.318008	0.00769044	0.0801268
Nucleotide	Purine Metabolism, Guanine containing	7-methylguanine	0.0205303	0.035145	0.294302	0.222537	0.294302	0.346424
Nucleotide	Purine Metabolism, Guanine containing	guanine	3.25913e-08	4.20974e-07	0.588198	0.333894	0.534064	0.416649
Nucleotide	Purine Metabolism, Guanine containing	guanosine	3.11019e-06	2.00945e-05	0.202951	0.180333	0.202951	0.317809
Nucleotide	Purine Metabolism, Guanine containing	guanosine 5'- monophosphate (5'-GMP)	1.57257e-05	8.59374e-05	0.943129	0.447478	0.937162	0.551311
Nucleotide	Pyrimidine Metabolism, Cytidine containing	2'-O-methylcytidine	0.0148875	0.026783	0.165534	0.160174	0.165534	0.280358
Nucleotide	Pyrimidine Metabolism, Cytidine containing	3-methylcytidine	0.924635	0.549692	0.0154547	0.0533272	0.116472	0.247441
Nucleotide	Pyrimidine Metabolism, Cytidine containing	cytidine	0.000384291	0.00134819	0.0761173	0.113233	0.19608	0.314786
Nucleotide	Pyrimidine Metabolism, Cytidine containing	cytidine 5'-monophosphate (5'-CMP)	0.00397626	0.00898327	0.0982861	0.127077	0.37762	0.373289
Nucleotide	Pyrimidine Metabolism, Cytidine containing	cytosine	0.717122	0.487521	0.589246	0.333894	0.810772	0.502945
Nucleotide	Pyrimidine Metabolism, Orotate containing	dihydroorotate	0.852548	0.530127	0.215269	0.18575	0.30901	0.350295
Nucleotide	Pyrimidine Metabolism, Orotate containing	N-carbamoylaspartate	0.97973	0.564276	0.43674	0.279252	0.419869	0.390004
Nucleotide	Pyrimidine Metabolism, Orotate containing	orotate	2.38548e-10	7.03109e-09	0.375936	0.25703	0.287955	0.346424
Nucleotide	Pyrimidine Metabolism, Orotate containing	orotidine	0.859224	0.532818	0.355712	0.250151	0.246573	0.322793
Nucleotide	Pyrimidine Metabolism, Thymine containing	3-aminoisobutyrate	0.272409	0.26415	0.0113603	0.0447279	0.576472	0.428258
Nucleotide	Pyrimidine Metabolism, Thymine containing	thymidine	0.000118206	0.000473107	0.242562	0.197334	0.242562	0.322793
Nucleotide	Pyrimidine Metabolism, Uracil containing	2'-deoxyuridine	3.9204e-07	3.97877e-06	0.491442	0.30074	0.759859	0.488549
Nucleotide	Pyrimidine Metabolism, Uracil containing	3-ureidopropionate	0.131057	0.153468	0.416324	0.273193	0.384194	0.377043
Nucleotide	Pyrimidine Metabolism, Uracil containing	5-methyluridine (ribothymidine)	1	0.568338	1	0.456717	1	0.555466
Nucleotide	Pyrimidine Metabolism, Uracil containing	pseudouridine	0.219548	0.229371	0.219548	0.187073	0.219548	0.32208
Nucleotide	Pyrimidine Metabolism, Uracil containing	uridine	2.25611e-09	4.00698e-08	0.307368	0.226276	0.106393	0.24481
Nucleotide	Pyrimidine Metabolism, Uracil containing	uridine 5'-diphosphate (UDP)	1	0.568338	1	0.456717	1	0.555466
Nucleotide	Pyrimidine Metabolism, Uracil containing	uridine 5'-monophosphate (UMP)	9.40705e-07	8.10059e-06	0.0824716	0.117707	0.864897	0.524319
Peptide	Acetylated Peptides	phenylacetylglutamine	0.58155	0.441499	0.0106275	0.0428194	0.728904	0.477026
Peptide	Acetylated Peptides	phenylacetylglycine	0.487466	0.39353	0.0960169	0.127077	0.407875	0.385873
Peptide	Dipeptide	glycylleucine	0.000716553	0.00228789	0.00011185	0.002838	0.000920267	0.0362988
Peptide	Dipeptide	glycylvaline	0.000433601	0.00146686	0.00459647	0.028972	0.781978	0.495847
Peptide	Dipeptide	histidylalanine
Peptide	Dipeptide	leucylalanine	0.585725	0.441499	0.838773	0.419127	0.843648	0.514964
Peptide	Dipeptide	phenylalanylalanine	0.0137668	0.0255399	0.261278	0.206454	0.0126273	0.092106
Peptide	Dipeptide	valylleucine	1.35833e-05	7.56855e-05	0.379857	0.258165	0.563914	0.424559
Peptide	Dipeptide Derivative	carnosine	0.837628	0.525448	0.626267	0.34461	0.144715	0.267947
Peptide	Gamma-glutamyl Amino Acid	gamma-glutamylalanine	0.600835	0.444172	0.946698	0.447478	0.595566	0.435285
Peptide	Gamma-glutamyl Amino Acid	gamma-glutamylcysteine	0.0129218	0.0243178	0.614462	0.343916	0.348194	0.368786
Peptide	Gamma-glutamyl Amino Acid	gamma-glutamyl-epsilon-lysine	0.315802	0.298144	0.0132833	0.048925	0.0284947	0.134427
Peptide	Gamma-glutamyl Amino Acid	gamma-glutamylglutamate	0.0014512	0.00408303	0.0916646	0.123132	0.0379419	0.154966
Peptide	Gamma-glutamyl Amino Acid	gamma-glutamylglutamine	0.245873	0.245164	0.263851	0.207767	0.36612	0.368786
Peptide	Gamma-glutamyl Amino Acid	gamma-glutamylhistidine	0.0602378	0.0835011	0.00614025	0.0341995	0.00959318	0.0832606
Peptide	Gamma-glutamyl Amino Acid	gamma-glutamylisoleucine*	2.98974e-06	2.00945e-05	0.0020467	0.0161166	0.123815	0.251004
Peptide	Gamma-glutamyl Amino Acid	gamma-glutamylleucine	8.20703e-06	4.75956e-05	0.000292817	0.00514363	0.290043	0.346424
Peptide	Gamma-glutamyl Amino Acid	gamma-glutamylthreonine	0.00500607	0.0109429	0.019708	0.0571411	0.108305	0.24481
Peptide	Gamma-glutamyl Amino Acid	gamma-glutamylvaline	5.46477e-05	0.000238911	0.102596	0.128025	0.470986	0.39594
Xenobiotics	Benzoate Metabolism	3-ethylphenylsulfate	0.468803	0.386143	0.050913	0.0945236	0.442414	0.392565
Xenobiotics	Benzoate Metabolism	4-ethylphenylsulfate	0.544591	0.426404	0.164939	0.160174	0.438572	0.392478
Xenobiotics	Benzoate Metabolism	4-methylcatechol sulfate	0.845466	0.529115	0.0553515	0.100317	0.231935	0.32208
Xenobiotics	Benzoate Metabolism	benzoate	0.253357	0.249987	0.355043	0.250151	0.126572	0.252148
Xenobiotics	Benzoate Metabolism	catechol sulfate	0.580897	0.441499	0.100784	0.127286	0.735912	0.478658
Xenobiotics	Benzoate Metabolism	hippurate	0.413071	0.356785	0.325812	0.234597	0.722583	0.477026
Xenobiotics	Benzoate Metabolism	p-hydroxybenzaldehyde	0.862884	0.533054	0.132113	0.144349	0.442307	0.392565
Xenobiotics	Chemical	4-acetamidobenzoate	0.00206289	0.00542787	0.332601	0.238095	0.0454656	0.165571
Xenobiotics	Chemical	benzoylcarnitine*	0.544692	0.426404	0.891025	0.435604	0.387963	0.378071
Xenobiotics	Chemical	glycerol 2-phosphate	2.26698e-21	6.44207e-19	1.36943e-11	3.12722e-09	1.36943e-11	3.80337e-09
Xenobiotics	Chemical	HEPES	0.957718	0.559987	0.0935034	0.124867	0.80044	0.500043
Xenobiotics	Chemical	lanthionine	0.329261	0.303785	0.198622	0.177175	0.0126392	0.092106
Xenobiotics	Chemical	N-methylpipecolate	0.142239	0.162983	0.539862	0.32007	0.764659	0.490464
Xenobiotics	Chemical	phenol red	0.725412	0.491981	0.0264321	0.0666198	0.427115	0.391498
Xenobiotics	Chemical	succinimide	0.131774	0.153468	0.357728	0.250151	0.208894	0.320535
Xenobiotics	Chemical	sulfate*	0.744699	0.498532	0.0132342	0.048925	0.514262	0.410138
Xenobiotics	Chemical	thioproline	0.0540402	0.0760226	0.0120639	0.0466932	0.325461	0.360125
Xenobiotics	Chemical	trizma acetate	0.973051	0.564276	0.362048	0.251297	0.147802	0.267958
Xenobiotics	Drug	S-carboxymethyl-L-cysteine	0.320996	0.299495	0.137424	0.147401	0.678702	0.461486
Xenobiotics	Food Component/Plant	2-keto-3-deoxy-gluconate	0.0531014	0.0750736	0.622066	0.34461	0.156064	0.27464
Xenobiotics	Food Component/Plant	alliin	1	0.568338	1	0.456717	1	0.555466
Xenobiotics	Food Component/Plant	beta-guanidinopropanoate	0.784912	0.512936	0.699848	0.372165	0.0809595	0.218302
Xenobiotics	Food Component/Plant	betonicine	0.551348	0.429104	0.904596	0.438582	0.791454	0.497821
Xenobiotics	Food Component/Plant	cinnamoylglycine	0.636953	0.459397	0.0123386	0.0469602	0.559063	0.423079
Xenobiotics	Food Component/Plant	ergothioneine	0.361195	0.324811	0.075113	0.113233	0.0470384	0.167489
Xenobiotics	Food Component/Plant	erythritol	0.00449476	0.00990134	0.00739807	0.0373666	0.216295	0.32208
Xenobiotics	Food Component/Plant	gluconate	0.540682	0.42561	0.118289	0.136942	0.307193	0.349662
Xenobiotics	Food Component/Plant	homostachydrine*	0.081138	0.105766	0.177124	0.168532	0.134277	0.258979
Xenobiotics	Food Component/Plant	phytanate	0.423471	0.360292	0.196114	0.176816	0.305012	0.349662
Xenobiotics	Food Component/Plant	pyrraline	0.221237	0.230288	0.00235402	0.0167988	0.36598	0.368786
Xenobiotics	Food Component/Plant	quinate	0.943753	0.55525	0.106829	0.131866	0.203187	0.317809
Xenobiotics	Food Component/Plant	stachydrine	0.0618423	0.084897	0.326687	0.234597	0.252287	0.324391

## Sheet: t_16h_24h
Additional file 9 (Sheet 2): Results of two-way ANOVA performed on data from uRBC and iRBC cultures at 16 and 24 h time points. Columns D, E, and F show p-values of treatment, time, and interaction effects. In our case, the treatment effect corresponds to parasite-infection.
Major pathway	Subordinate pathway	Biochemical name	treatment		time		interaction
			p-value	q-value	p-value	q-value	p-value	q-value
Amino Acid	Alanine and Aspartate Metabolism	3-sulfo-L-alanine	0.0123151	0.00229966	0.075496	0.104502	0.0348193	0.0708785
Amino Acid	Alanine and Aspartate Metabolism	alanine	1.83719e-08	1.47642e-08	0.973372	0.484499	0.000552669	0.00518501
Amino Acid	Alanine and Aspartate Metabolism	asparagine	0.0170043	0.00298923	0.638541	0.388486	0.194087	0.201574
Amino Acid	Alanine and Aspartate Metabolism	aspartate	2.72631e-05	9.6608e-06	0.149154	0.161579	0.125529	0.157734
Amino Acid	Alanine and Aspartate Metabolism	N-acetylalanine	3.23217e-05	1.11036e-05	0.905272	0.470565	0.840697	0.371221
Amino Acid	Alanine and Aspartate Metabolism	N-acetylasparagine	0.00203582	0.000479677	0.0874965	0.112869	0.667236	0.340409
Amino Acid	Alanine and Aspartate Metabolism	N-acetylaspartate (NAA)	7.7643e-05	2.49584e-05	0.185113	0.18391	0.685892	0.343997
Amino Acid	Creatine Metabolism	creatine	0.026649	0.00449172	0.024157	0.0583528	0.532614	0.321719
Amino Acid	Creatine Metabolism	creatine phosphate	1.79908e-05	6.63641e-06	0.512571	0.347533	0.0129561	0.0412087
Amino Acid	Creatine Metabolism	creatinine	0.000511152	0.000132204	0.00169857	0.00974486	0.754125	0.355222
Amino Acid	Creatine Metabolism	guanidinoacetate	0.0224673	0.00384447	0.200573	0.193799	0.200573	0.205019
Amino Acid	Glutamate Metabolism	4-hydroxyglutamate	0.0651339	0.00972987	0.628272	0.385071	0.0810528	0.118699
Amino Acid	Glutamate Metabolism	beta-citrylglutamate	2.82222e-05	9.92252e-06	0.0568648	0.0892985	0.0559803	0.0965712
Amino Acid	Glutamate Metabolism	carboxyethyl-GABA	0.00602829	0.00126772	0.819511	0.448705	0.492621	0.312145
Amino Acid	Glutamate Metabolism	glutamate	4.03829e-10	6.05784e-10	0.960963	0.482219	0.135388	0.166023
Amino Acid	Glutamate Metabolism	glutamate, gamma-methyl ester	0.0268624	0.00451079	0.394161	0.296215	0.00435777	0.0180366
Amino Acid	Glutamate Metabolism	glutamine	0.00572116	0.00121448	0.186376	0.184197	0.454036	0.30604
Amino Acid	Glutamate Metabolism	N-acetylglutamate	0.0172286	0.00300518	0.00149671	0.0092193	0.265333	0.234899
Amino Acid	Glutamate Metabolism	N-acetylglutamine	0.589526	0.0598133	0.348235	0.275887	0.0960597	0.132122
Amino Acid	Glutamate Metabolism	pyroglutamine*	0.258165	0.0308995	0.0313209	0.065958	0.233379	0.227788
Amino Acid	Glutamate Metabolism	S-1-pyrroline-5-carboxylate	0.149113	0.0196214	0.000538726	0.00468555	0.146805	0.175787
Amino Acid	Glutathione Metabolism	4-hydroxy-nonenal-glutathione	0.0292442	0.00473949	0.44983	0.324072	0.573997	0.327292
Amino Acid	Glutathione Metabolism	5-oxoproline	0.0115176	0.0021963	0.084632	0.110018	0.553759	0.323173
Amino Acid	Glutathione Metabolism	cysteine-glutathione disulfide	0.738058	0.070787	0.228104	0.214128	0.873842	0.37518
Amino Acid	Glutathione Metabolism	cysteinylglycine	0.61046	0.0610501	0.763589	0.428563	0.411211	0.292881
Amino Acid	Glutathione Metabolism	glutathione, oxidized (GSSG)	0.0119681	0.00225316	0.039635	0.0734254	0.469275	0.311025
Amino Acid	Glutathione Metabolism	glutathione, reduced (GSH)	0.00032196	8.88907e-05	0.000995953	0.00701116	0.0021492	0.0119224
Amino Acid	Glutathione Metabolism	ophthalmate	0.0423512	0.00648276	0.253892	0.223822	0.15883	0.185417
Amino Acid	Glutathione Metabolism	S-lactoylglutathione	6.19921e-07	3.81267e-07	0.638574	0.388486	0.0691222	0.110792
Amino Acid	Glutathione Metabolism	S-methylglutathione	0.0128997	0.002389	0.015045	0.042124	0.837881	0.370782
Amino Acid	Glutathione Metabolism	S-nitrosoglutathione (GSNO)	0.00464014	0.00101864	0.0541058	0.0876193	0.0160984	0.0448906
Amino Acid	Glycine, Serine and Threonine Metabolism	betaine	0.00535986	0.00114862	0.0923643	0.117306	0.340369	0.260473
Amino Acid	Glycine, Serine and Threonine Metabolism	dimethylglycine	0.518624	0.0545106	0.0281221	0.0641569	0.0301447	0.0682237
Amino Acid	Glycine, Serine and Threonine Metabolism	glycine	8.62222e-06	3.52751e-06	0.0284434	0.0642946	0.0142708	0.0413292
Amino Acid	Glycine, Serine and Threonine Metabolism	N-acetylglycine	7.90362e-06	3.27088e-06	0.70728	0.407162	0.846705	0.373065
Amino Acid	Glycine, Serine and Threonine Metabolism	N-acetylserine	3.20813e-12	2.40626e-11	0.534769	0.349497	0.00134664	0.00856638
Amino Acid	Glycine, Serine and Threonine Metabolism	N-acetylthreonine	4.23645e-06	2.00687e-06	0.183831	0.18391	0.00285988	0.0140187
Amino Acid	Glycine, Serine and Threonine Metabolism	serine	0.00226963	0.000521125	0.0419796	0.0764299	0.0543202	0.0958101
Amino Acid	Glycine, Serine and Threonine Metabolism	threonine	5.86187e-05	1.92556e-05	0.728958	0.413839	0.0146183	0.0413292
Amino Acid	Guanidino and Acetamido Metabolism	4-guanidinobutanoate	0.20939	0.0259947	0.0266852	0.0632203	0.29197	0.245804
Amino Acid	Histidine Metabolism	4-imidazoleacetate	0.117013	0.0158137	0.612111	0.379891	0.720524	0.345757
Amino Acid	Histidine Metabolism	formiminoglutamate	2.97558e-05	1.03806e-05	0.274561	0.235709	0.260011	0.234195
Amino Acid	Histidine Metabolism	histidine	6.38439e-06	2.78948e-06	0.507785	0.345982	0.135261	0.166023
Amino Acid	Histidine Metabolism	imidazole lactate	9.82767e-06	3.98446e-06	0.660767	0.390688	0.654708	0.340409
Amino Acid	Histidine Metabolism	N-acetylhistidine	3.30786e-06	1.61808e-06	0.0333841	0.0668996	0.0346649	0.0708785
Amino Acid	Leucine, Isoleucine and Valine Metabolism	2-methylbutyrylcarnitine (C5)	0.791541	0.0742272	0.0107234	0.0361933	0.761906	0.355721
Amino Acid	Leucine, Isoleucine and Valine Metabolism	3-methyl-2-oxobutyrate	0.0698321	0.0102367	0.505714	0.345982	0.0904938	0.127924
Amino Acid	Leucine, Isoleucine and Valine Metabolism	3-methyl-2-oxovalerate	5.16081e-06	2.31299e-06	0.028109	0.0641569	0.0232038	0.058766
Amino Acid	Leucine, Isoleucine and Valine Metabolism	3-methylglutaconate	0.778586	0.0739214	0.314931	0.257791	0.00402536	0.0178132
Amino Acid	Leucine, Isoleucine and Valine Metabolism	4-methyl-2-oxopentanoate	0.00153799	0.000374132	0.064785	0.0985323	0.0545978	0.0958101
Amino Acid	Leucine, Isoleucine and Valine Metabolism	beta-hydroxyisovalerate	0.914448	0.0833055	0.610689	0.379891	0.910256	0.383628
Amino Acid	Leucine, Isoleucine and Valine Metabolism	isobutyrylcarnitine (C4)	0.0657263	0.00972987	0.0039331	0.0179457	0.14246	0.171593
Amino Acid	Leucine, Isoleucine and Valine Metabolism	isobutyrylglycine	0.604717	0.060658	0.664135	0.390688	0.487011	0.311782
Amino Acid	Leucine, Isoleucine and Valine Metabolism	isoleucine	0.592441	0.0598133	0.0166633	0.0450099	0.295362	0.246122
Amino Acid	Leucine, Isoleucine and Valine Metabolism	isovalerylcarnitine (C5)	0.0160129	0.00283711	0.0137131	0.0392876	0.810532	0.365028
Amino Acid	Leucine, Isoleucine and Valine Metabolism	isovalerylglycine	0.000566423	0.000145662	0.873565	0.462873	0.0988933	0.135106
Amino Acid	Leucine, Isoleucine and Valine Metabolism	leucine	0.00971328	0.00191722	0.519284	0.347677	0.0592554	0.100517
Amino Acid	Leucine, Isoleucine and Valine Metabolism	methylsuccinate	0.130264	0.017344	0.254468	0.223822	0.0950309	0.131596
Amino Acid	Leucine, Isoleucine and Valine Metabolism	N-acetylisoleucine	1.48802e-05	5.82308e-06	0.121785	0.14221	0.528188	0.320865
Amino Acid	Leucine, Isoleucine and Valine Metabolism	N-acetylleucine	0.787367	0.0742272	0.161593	0.170878	0.833791	0.370623
Amino Acid	Leucine, Isoleucine and Valine Metabolism	N-acetylvaline	7.04174e-10	9.43416e-10	0.977368	0.485477	0.00427229	0.0180366
Amino Acid	Leucine, Isoleucine and Valine Metabolism	tiglylcarnitine (C5:1-DC)	0.491541	0.052049	0.518783	0.347677	0.334142	0.258624
Amino Acid	Leucine, Isoleucine and Valine Metabolism	valine	4.83336e-06	2.24251e-06	0.415755	0.308088	0.00250726	0.0132565
Amino Acid	Lysine Metabolism	2-aminoadipate	0.0118366	0.0022476	0.0469726	0.0809333	0.424141	0.298327
Amino Acid	Lysine Metabolism	glutarylcarnitine (C5-DC)	0.651187	0.0639856	0.0442043	0.0781441	0.512415	0.318801
Amino Acid	Lysine Metabolism	lysine	5.60871e-07	3.55505e-07	0.92518	0.475708	0.0218976	0.0578895
Amino Acid	Lysine Metabolism	N6,N6,N6-trimethyllysine	1.64522e-05	6.16997e-06	0.235809	0.216792	0.0269752	0.06385
Amino Acid	Lysine Metabolism	N6-acetyllysine	6.34253e-07	3.81267e-07	0.627905	0.385071	0.721881	0.345757
Amino Acid	Lysine Metabolism	pipecolate	1.2317e-11	5.54305e-11	0.00170069	0.00974486	0.078268	0.117149
Amino Acid	Methionine, Cysteine, SAM and Taurine Metabolism	cysteine	0.232322	0.0283339	0.131096	0.14885	0.728815	0.345823
Amino Acid	Methionine, Cysteine, SAM and Taurine Metabolism	cysteine sulfinic acid	0.0404494	0.00623406	0.326107	0.263438	0.0112586	0.0375705
Amino Acid	Methionine, Cysteine, SAM and Taurine Metabolism	hypotaurine	0.639775	0.0630018	0.000116625	0.00136833	0.253814	0.234195
Amino Acid	Methionine, Cysteine, SAM and Taurine Metabolism	methionine	0.0143539	0.00260471	0.0207378	0.0530561	0.0620542	0.103132
Amino Acid	Methionine, Cysteine, SAM and Taurine Metabolism	methionine sulfoxide	9.24652e-09	8.00233e-09	0.0300409	0.0648495	0.00153619	0.00921297
Amino Acid	Methionine, Cysteine, SAM and Taurine Metabolism	N-acetylcysteine	0.0281126	0.00465416	0.166556	0.173887	0.854971	0.373473
Amino Acid	Methionine, Cysteine, SAM and Taurine Metabolism	N-acetylmethionine	2.95467e-06	1.47743e-06	0.35191	0.27685	0.259806	0.234195
Amino Acid	Methionine, Cysteine, SAM and Taurine Metabolism	N-acetylmethionine sulfoxide	0.0137678	0.00250848	0.41639	0.308088	0.623414	0.337715
Amino Acid	Methionine, Cysteine, SAM and Taurine Metabolism	N-formylmethionine	5.15189e-06	2.31299e-06	0.00202311	0.0103848	0.862373	0.374365
Amino Acid	Methionine, Cysteine, SAM and Taurine Metabolism	S-adenosylhomocysteine (SAH)	0.00242841	0.000551948	0.340561	0.270677	0.0623164	0.103132
Amino Acid	Methionine, Cysteine, SAM and Taurine Metabolism	taurine	2.07029e-05	7.51364e-06	0.000772876	0.00577052	0.0241597	0.0592527
Amino Acid	Phenylalanine and Tyrosine Metabolism	3-(4-hydroxyphenyl)lactate	2.32757e-10	3.87954e-10	0.634514	0.387932	0.00216707	0.0119224
Amino Acid	Phenylalanine and Tyrosine Metabolism	3-phenylpropionate (hydrocinnamate)	0.280853	0.0333489	0.520753	0.347716	0.597717	0.334263
Amino Acid	Phenylalanine and Tyrosine Metabolism	4-hydroxyphenylpyruvate	3.9221e-05	1.32711e-05	0.0722017	0.102972	0.258897	0.234195
Amino Acid	Phenylalanine and Tyrosine Metabolism	N-acetylphenylalanine	0.33649	0.0389282	2.56524e-05	0.000637615	0.000229799	0.00275166
Amino Acid	Phenylalanine and Tyrosine Metabolism	N-formylphenylalanine	5.93713e-07	3.71096e-07	0.54437	0.352963	0.17829	0.196213
Amino Acid	Phenylalanine and Tyrosine Metabolism	p-cresol sulfate	0.736427	0.070787	0.0714827	0.102972	0.452226	0.30604
Amino Acid	Phenylalanine and Tyrosine Metabolism	phenol sulfate	0.408433	0.0449821	0.104411	0.128115	0.0568898	0.0973155
Amino Acid	Phenylalanine and Tyrosine Metabolism	phenylalanine	1.53283e-05	5.94671e-06	0.922645	0.475708	0.00965448	0.0333097
Amino Acid	Phenylalanine and Tyrosine Metabolism	phenyllactate (PLA)	0.927046	0.0839434	0.580424	0.366691	0.688167	0.343997
Amino Acid	Phenylalanine and Tyrosine Metabolism	phenylpyruvate	0.000224138	6.50766e-05	0.941961	0.477547	0.65625	0.340409
Amino Acid	Phenylalanine and Tyrosine Metabolism	p-toluic acid	0.359798	0.0410965	0.047994	0.0815526	0.219837	0.220444
Amino Acid	Phenylalanine and Tyrosine Metabolism	tyrosine	0.118763	0.0159543	0.296489	0.250015	0.257834	0.234195
Amino Acid	Polyamine Metabolism	5-methylthioadenosine (MTA)	9.67318e-10	1.17655e-09	0.00238023	0.0117292	0.000274902	0.00310885
Amino Acid	Polyamine Metabolism	N(1)-acetylspermine	1.61155e-06	8.84448e-07	0.000294723	0.00279293	0.415848	0.294721
Amino Acid	Polyamine Metabolism	N(4)-acetylspermidine	1.1162e-08	9.30227e-09	0.0333971	0.0668996	0.0333971	0.0700861
Amino Acid	Polyamine Metabolism	N1,N12-diacetylspermine	7.56973e-10	9.73316e-10	0.0557032	0.0885461	0.0557032	0.0965712
Amino Acid	Polyamine Metabolism	putrescine	7.2337e-11	1.71336e-10	7.59443e-05	0.00102514	7.59443e-05	0.00110423
Amino Acid	Polyamine Metabolism	spermidine	1.18122e-10	2.22907e-10	0.236939	0.217022	0.00867165	0.0304346
Amino Acid	Polyamine Metabolism	spermine	0.388732	0.0436262	0.000204755	0.00219344	0.00525978	0.020561
Amino Acid	Tryptophan Metabolism	3-indoxyl sulfate	0.90183	0.08249	0.0359354	0.068636	0.0928782	0.130389
Amino Acid	Tryptophan Metabolism	C-glycosyltryptophan	0.549503	0.0565888	0.321575	0.261492	0.503146	0.314175
Amino Acid	Tryptophan Metabolism	indolelactate	3.97051e-05	1.33347e-05	0.0500495	0.0828849	0.182177	0.196213
Amino Acid	Tryptophan Metabolism	kynurenine	0.763076	0.072602	0.7212	0.412285	0.037814	0.0762124
Amino Acid	Tryptophan Metabolism	tryptophan	0.000171689	5.22064e-05	0.394332	0.296215	0.100131	0.135884
Amino Acid	Tryptophan Metabolism	tryptophan betaine	0.0387623	0.00605701	0.0477834	0.0815526	0.0891044	0.127362
Amino Acid	Urea cycle; Arginine and Proline Metabolism	2-oxoarginine*	0.00156337	0.000376237	0.142317	0.157951	0.332304	0.258184
Amino Acid	Urea cycle; Arginine and Proline Metabolism	argininate*	0.845467	0.0787755	0.0102719	0.035151	0.582531	0.329759
Amino Acid	Urea cycle; Arginine and Proline Metabolism	arginine	0.161008	0.0207929	0.251845	0.223207	0.462765	0.308855
Amino Acid	Urea cycle; Arginine and Proline Metabolism	argininosuccinate	4.77215e-09	4.66872e-09	0.0149271	0.042124	0.00253979	0.0132565
Amino Acid	Urea cycle; Arginine and Proline Metabolism	citrulline	0.204407	0.0254819	0.143747	0.158822	0.452718	0.30604
Amino Acid	Urea cycle; Arginine and Proline Metabolism	dimethylarginine (SDMA + ADMA)	6.35402e-07	3.81267e-07	0.746118	0.420674	0.0225868	0.0581998
Amino Acid	Urea cycle; Arginine and Proline Metabolism	homocitrulline	0.554608	0.0567251	0.00109267	0.00747833	0.60788	0.336252
Amino Acid	Urea cycle; Arginine and Proline Metabolism	N-acetylarginine	0.391995	0.043883	0.103681	0.128115	0.427882	0.298327
Amino Acid	Urea cycle; Arginine and Proline Metabolism	N-acetylproline	0.399854	0.0444005	0.328638	0.264616	0.851535	0.373473
Amino Acid	Urea cycle; Arginine and Proline Metabolism	N-alpha-acetylornithine	0.758049	0.0722765	0.571453	0.364764	0.718324	0.345757
Amino Acid	Urea cycle; Arginine and Proline Metabolism	N-delta-acetylornithine	0.0279851	0.00465416	0.0326698	0.0668996	0.0806504	0.118699
Amino Acid	Urea cycle; Arginine and Proline Metabolism	N-monomethylarginine	1.0213e-05	4.10372e-06	0.981432	0.485477	0.326424	0.255425
Amino Acid	Urea cycle; Arginine and Proline Metabolism	ornithine	0.107729	0.0146469	0.00521002	0.0213948	0.648099	0.340409
Amino Acid	Urea cycle; Arginine and Proline Metabolism	proline	0.00627244	0.00130082	0.775642	0.434338	0.00270722	0.0137771
Amino Acid	Urea cycle; Arginine and Proline Metabolism	trans-4-hydroxyproline	0.343666	0.0394541	0.0723252	0.102972	0.465001	0.309333
Amino Acid	Urea cycle; Arginine and Proline Metabolism	urea	0.0237967	0.00405653	0.0441254	0.0781441	0.0772998	0.116557
Carbohydrate	Advanced Glycation End-product	N6-carboxymethyllysine	1.6457e-07	1.12214e-07	0.100766	0.126671	0.165128	0.18884
Carbohydrate	Aminosugar Metabolism	erythronate*	5.97548e-05	1.94866e-05	0.0124835	0.0379726	0.117019	0.14961
Carbohydrate	Aminosugar Metabolism	N-acetylglucosamine/N-acetylgalactosamine	0.000734059	0.000187698	0.00492559	0.0212913	0.306812	0.247784
Carbohydrate	Aminosugar Metabolism	N-acetylglucosaminylasparagine	0.529003	0.0552858	0.983219	0.485477	0.529307	0.320865
Carbohydrate	Aminosugar Metabolism	N-acetylneuraminate	0.163549	0.0210292	0.98927	0.486515	0.835298	0.370623
Carbohydrate	Disaccharides and Oligosaccharides	lactose	0.0971964	0.0135422	0.455266	0.32436	0.289184	0.245804
Carbohydrate	Fructose, Mannose and Galactose Metabolism	fructose	0.00277626	0.0006247	0.0112286	0.0369743	0.262812	0.234642
Carbohydrate	Fructose, Mannose and Galactose Metabolism	galactonate	0.672194	0.0654778	0.19089	0.186702	0.690187	0.343997
Carbohydrate	Fructose, Mannose and Galactose Metabolism	mannitol/sorbitol	1.17998e-10	2.22907e-10	0.0056561	0.0228429	0.00107885	0.00734916
Carbohydrate	Fructose, Mannose and Galactose Metabolism	mannose	0.00951921	0.0018872	0.261984	0.22809	0.701784	0.34494
Carbohydrate	Fructose, Mannose and Galactose Metabolism	mannose-6-phosphate	0.00326623	0.000731294	0.00069797	0.0053741	0.978577	0.40162
Carbohydrate	Glycogen Metabolism	maltose	0.594105	0.0598133	0.844971	0.454723	0.46265	0.308855
Carbohydrate	Glycolysis, Gluconeogenesis, and Pyruvate Metabolism	2,3-diphosphoglycerate	0.135924	0.0179912	0.0295892	0.0648495	0.000560374	0.00518501
Carbohydrate	Glycolysis, Gluconeogenesis, and Pyruvate Metabolism	2-phosphoglycerate	0.0155847	0.00278316	0.724367	0.412756	0.660572	0.340409
Carbohydrate	Glycolysis, Gluconeogenesis, and Pyruvate Metabolism	3-phosphoglycerate	0.305867	0.0360339	0.00574809	0.0228429	0.00153881	0.00921297
Carbohydrate	Glycolysis, Gluconeogenesis, and Pyruvate Metabolism	dihydroxyacetone phosphate (DHAP)	4.19002e-09	4.1903e-09	0.608135	0.379334	0.697772	0.344931
Carbohydrate	Glycolysis, Gluconeogenesis, and Pyruvate Metabolism	fructose-6-phosphate	3.89511e-09	3.9839e-09	0.383735	0.291814	0.0259176	0.0620684
Carbohydrate	Glycolysis, Gluconeogenesis, and Pyruvate Metabolism	glucose	2.28285e-07	1.51081e-07	7.90531e-05	0.00102514	0.00443027	0.0180366
Carbohydrate	Glycolysis, Gluconeogenesis, and Pyruvate Metabolism	glucose 6-phosphate	0.168972	0.021603	0.00706251	0.0267975	0.256817	0.234195
Carbohydrate	Glycolysis, Gluconeogenesis, and Pyruvate Metabolism	glycerate	0.000468045	0.000123178	0.660421	0.390688	0.031326	0.0693126
Carbohydrate	Glycolysis, Gluconeogenesis, and Pyruvate Metabolism	Isobar: fructose 1,6-diphosphate, glucose 1,6-diphosphate, myo-inositol 1,4 or 1,3-diphosphate	1.14733e-09	1.29084e-09	0.675947	0.394657	0.192174	0.200929
Carbohydrate	Glycolysis, Gluconeogenesis, and Pyruvate Metabolism	lactate	3.44943e-10	5.35293e-10	0.00960513	0.0338084	0.00289243	0.0140187
Carbohydrate	Glycolysis, Gluconeogenesis, and Pyruvate Metabolism	phosphoenolpyruvate (PEP)	0.883659	0.0813238	1.21327e-05	0.000463858	5.70877e-05	0.00105644
Carbohydrate	Glycolysis, Gluconeogenesis, and Pyruvate Metabolism	pyruvate	5.37785e-10	7.80708e-10	6.16168e-10	1.51816e-07	5.26526e-09	1.0718e-06
Carbohydrate	Nucleotide Sugar	UDP-galactose	0.209676	0.0259947	0.0396261	0.0734254	0.741228	0.350081
Carbohydrate	Nucleotide Sugar	UDP-glucose	0.0464552	0.00706292	0.896221	0.469109	0.301062	0.246122
Carbohydrate	Nucleotide Sugar	UDP-glucuronate	0.000350867	9.56975e-05	0.120856	0.141797	0.484094	0.311782
Carbohydrate	Nucleotide Sugar	UDP-N-acetylgalactosamine	0.012016	0.00225316	0.80155	0.444802	0.0894091	0.127362
Carbohydrate	Nucleotide Sugar	UDP-N-acetylglucosamine	0.225699	0.0276009	0.424006	0.309761	0.776756	0.359961
Carbohydrate	Pentose Metabolism	arabitol/xylitol	8.53968e-11	1.92156e-10	0.00175358	0.00974788	0.000308395	0.00330406
Carbohydrate	Pentose Metabolism	arabonate/xylonate	0.0100198	0.00195203	0.12969	0.147967	0.199304	0.204901
Carbohydrate	Pentose Metabolism	ribitol	1.64637e-06	8.9267e-07	0.0307303	0.0652722	0.0946777	0.131596
Carbohydrate	Pentose Metabolism	ribonate	7.22154e-08	5.15859e-08	0.164443	0.173149	0.597272	0.334263
Carbohydrate	Pentose Metabolism	ribulose/xylulose	0.000240507	6.92388e-05	0.527968	0.348688	0.290849	0.245804
Carbohydrate	Pentose Phosphate Pathway	6-phosphogluconate	0.40881	0.0449821	0.625722	0.385071	0.401538	0.289849
Carbohydrate	Pentose Phosphate Pathway	ribulose/xylulose 5-phosphate	0.000302066	8.4513e-05	0.0133717	0.039065	0.719673	0.345757
Carbohydrate	Pentose Phosphate Pathway	sedoheptulose-7-phosphate	1.00778e-09	1.18575e-09	0.912371	0.472263	0.0799402	0.118699
Cofactors and Vitamins	Ascorbate and Aldarate Metabolism	gulonate*	0.106534	0.0145725	0.850359	0.455474	0.278972	0.242039
Cofactors and Vitamins	Ascorbate and Aldarate Metabolism	threonate	0.184368	0.0233066	0.068607	0.101221	0.307963	0.247784
Cofactors and Vitamins	Biotin Metabolism	biotin	0.212402	0.0261883	0.0596325	0.092407	0.493108	0.312145
Cofactors and Vitamins	Hemoglobin and Porphyrin Metabolism	biliverdin	0.0994318	0.0137262	0.101783	0.1273	0.521425	0.319704
Cofactors and Vitamins	Hemoglobin and Porphyrin Metabolism	heme	1.63645e-05	6.16997e-06	0.113775	0.136746	0.788891	0.361683
Cofactors and Vitamins	Nicotinate and Nicotinamide Metabolism	1-methylnicotinamide	0.0396809	0.00615779	0.00169211	0.00974486	0.952847	0.395035
Cofactors and Vitamins	Nicotinate and Nicotinamide Metabolism	nicotinamide	1.91237e-06	1.0125e-06	0.0273288	0.063605	0.0519154	0.0958101
Cofactors and Vitamins	Nicotinate and Nicotinamide Metabolism	nicotinamide adenine dinucleotide (NAD+)	0.000759987	0.00019323	0.176093	0.178539	0.481338	0.311782
Cofactors and Vitamins	Nicotinate and Nicotinamide Metabolism	nicotinamide ribonucleotide (NMN)	0.0712566	0.0104116	0.841274	0.45456	0.499336	0.31372
Cofactors and Vitamins	Nicotinate and Nicotinamide Metabolism	nicotinamide riboside	3.12855e-05	1.08303e-05	0.0327068	0.0668996	0.560423	0.323173
Cofactors and Vitamins	Nicotinate and Nicotinamide Metabolism	nicotinate adenine dinucleotide (NAAD+)	1.3628e-06	7.5716e-07	0.00181742	0.00974788	0.00181742	0.0105701
Cofactors and Vitamins	Nicotinate and Nicotinamide Metabolism	nicotinate ribonucleoside	1.43256e-09	1.57243e-09	0.0737062	0.103773	0.0737062	0.113664
Cofactors and Vitamins	Nicotinate and Nicotinamide Metabolism	nicotinic acid mononucleotide (NaMN)	2.24305e-15	1.00944e-13	0.664076	0.390688	0.0536566	0.0958101
Cofactors and Vitamins	Nicotinate and Nicotinamide Metabolism	trigonelline (N'-methylnicotinate)	0.118611	0.0159543	2.26036e-06	0.000185642	0.0145954	0.0413292
Cofactors and Vitamins	Pantothenate and CoA Metabolism	pantothenate	4.86202e-08	3.64676e-08	0.00120787	0.0078317	0.000782807	0.00637396
Cofactors and Vitamins	Riboflavin Metabolism	riboflavin (Vitamin B2)	0.0653738	0.00972987	0.227608	0.214128	0.48804	0.311782
Cofactors and Vitamins	Thiamine Metabolism	thiamin (Vitamin B1)	0.00184295	0.000436518	0.904395	0.470565	0.392182	0.286279
Cofactors and Vitamins	Tocopherol Metabolism	alpha-tocopherol	0.361494	0.0411857	0.830101	0.451494	0.0277458	0.0649192
Cofactors and Vitamins	Vitamin B6 Metabolism	pyridoxal	0.739352	0.070787	0.0328599	0.0668996	0.105903	0.139625
Cofactors and Vitamins	Vitamin B6 Metabolism	pyridoxal phosphate	1.81822e-09	1.94822e-09	0.0557034	0.0885461	0.0139627	0.0413292
Cofactors and Vitamins	Vitamin B6 Metabolism	pyridoxamine	0.000257171	7.32499e-05	0.672495	0.394403	0.181442	0.196213
Cofactors and Vitamins	Vitamin B6 Metabolism	pyridoxate	0.66246	0.0648102	0.574204	0.365573	0.37214	0.274468
Cofactors and Vitamins	Vitamin B6 Metabolism	pyridoxine (Vitamin B6)	0.00620156	0.00129208	0.221252	0.209669	0.261511	0.234509
Cofactors and Vitamins	Vitamin B6 Metabolism	pyridoxine phosphate	0.028782	0.00473949	0.823825	0.450038	0.854159	0.373473
Energy	Oxidative Phosphorylation	acetylphosphate	0.148787	0.0196214	0.255264	0.223822	0.00535334	0.020561
Energy	Oxidative Phosphorylation	phosphate	0.00982507	0.00193082	0.680054	0.396116	0.0749615	0.114731
Energy	TCA Cycle	2-methylcitrate/homocitrate	0.293462	0.0346632	0.167734	0.174294	0.664703	0.340409
Energy	TCA Cycle	aconitate [cis or trans]	0.358506	0.0410531	0.430627	0.312983	0.47982	0.311782
Energy	TCA Cycle	alpha-ketoglutarate	6.77241e-05	2.19265e-05	1.71317e-06	0.000185642	0.168948	0.191063
Energy	TCA Cycle	citrate	0.45147	0.048375	0.529418	0.348688	0.55605	0.323173
Energy	TCA Cycle	fumarate	2.42744e-11	7.803e-11	0.000105733	0.00130257	4.9836e-06	0.000202893
Energy	TCA Cycle	malate	1.76247e-12	1.58633e-11	4.51823e-05	0.000761683	4.06443e-05	0.000827359
Energy	TCA Cycle	succinate	2.04948e-07	1.37661e-07	0.00228512	0.0114903	0.0321115	0.0697576
Energy	TCA Cycle	succinylcarnitine (C4-DC)	0.531548	0.0553733	0.0814975	0.107035	0.921731	0.385274
Energy	TCA Cycle	tricarballylate	0.00523896	0.00112808	0.0413819	0.0760895	0.0402186	0.080264
Lipid	Carnitine Metabolism	carnitine	0.366074	0.0416021	0.0237839	0.0580205	0.560168	0.323173
Lipid	Carnitine Metabolism	deoxycarnitine	0.00121738	0.000299376	0.00722282	0.0267975	0.354848	0.269527
Lipid	Ceramides	ceramide (d16:1/24:1, d18:1/22:1)*	0.568674	0.0579005	0.0799377	0.106942	0.0328979	0.0697576
Lipid	Ceramides	ceramide (d18:1/14:0, d16:1/16:0)*	1.62145e-05	6.16997e-06	0.0493006	0.0828071	0.610363	0.336579
Lipid	Ceramides	ceramide (d18:1/17:0, d17:1/18:0)*	0.0130846	0.0024133	0.116374	0.137852	0.153738	0.180917
Lipid	Ceramides	ceramide (d18:1/20:0, d16:1/22:0, d20:1/18:0)*	0.096799	0.0135287	0.92868	0.475708	0.000744278	0.00631274
Lipid	Diacylglycerol	diacylglycerol (16:1/18:2 [2], 16:0/18:3 [1])*	0.0333746	0.00532609	0.0364616	0.0691052	0.0301636	0.0682237
Lipid	Diacylglycerol	oleoyl-oleoyl-glycerol (18:1/18:1) [2]*	0.00568944	0.00121347	0.661474	0.390688	0.4012	0.289849
Lipid	Diacylglycerol	palmitoyl-arachidonoyl-glycerol (16:0/20:4) [1]*	1.76601e-11	7.15674e-11	0.517763	0.347677	0.517763	0.319704
Lipid	Diacylglycerol	palmitoyl-arachidonoyl-glycerol (16:0/20:4) [2]*	1.18876e-10	2.22907e-10	0.158079	0.167883	0.870109	0.37518
Lipid	Diacylglycerol	palmitoyl-linolenoyl-glycerol (16:0/18:3) [2]*	0.00761741	0.00154417	0.645129	0.389588	0.645129	0.340215
Lipid	Diacylglycerol	palmitoyl-oleoyl-glycerol (16:0/18:1) [2]*	4.27934e-12	2.75119e-11	0.0326911	0.0668996	0.0326911	0.0697576
Lipid	Diacylglycerol	stearoyl-arachidonoyl-glycerol (18:0/20:4) [1]*	5.19102e-06	2.31299e-06	0.0494044	0.0828071	0.0494044	0.0939888
Lipid	Diacylglycerol	stearoyl-arachidonoyl-glycerol (18:0/20:4) [2]*	4.53777e-08	3.46124e-08	0.011577	0.0373269	0.011577	0.0380101
Lipid	Diacylglycerol	stearoyl-linoleoyl-glycerol (18:0/18:2) [2]*	0.000316201	8.78396e-05	0.486988	0.336101	0.133028	0.165117
Lipid	Endocannabinoid	linoleoyl ethanolamide	0.00225829	0.000521125	0.447637	0.324072	0.298162	0.246122
Lipid	Endocannabinoid	oleoyl ethanolamide	0.0104909	0.00201762	0.965135	0.48308	0.881081	0.376004
Lipid	Endocannabinoid	palmitoyl ethanolamide	0.0149345	0.00269919	0.931877	0.476355	0.991116	0.404314
Lipid	Endocannabinoid	stearoyl ethanolamide	6.70735e-06	2.90241e-06	0.0569016	0.0892985	0.663588	0.340409
Lipid	Fatty Acid Metabolism (Acyl Choline)	oleoylcholine	0.000160223	4.90511e-05	0.244451	0.218821	0.655169	0.340409
Lipid	Fatty Acid Metabolism (Acyl Choline)	palmitoylcholine	0.000120931	3.77933e-05	0.857875	0.45751	0.546591	0.321926
Lipid	Fatty Acid Metabolism (Acyl Choline)	stearoylcholine*	0.00731636	0.00148986	0.0746544	0.103921	0.759093	0.355222
Lipid	Fatty Acid Metabolism (also BCAA Metabolism)	butyrylcarnitine (C4)	0.382222	0.0431107	0.556847	0.360106	0.663387	0.340409
Lipid	Fatty Acid Metabolism (also BCAA Metabolism)	methylmalonate (MMA)	0.930522	0.084089	0.0767311	0.104614	0.300274	0.246122
Lipid	Fatty Acid Metabolism (also BCAA Metabolism)	propionylcarnitine (C3)	0.0977801	0.0135776	2.84664e-05	0.000637615	0.365074	0.272019
Lipid	Fatty Acid Metabolism(Acyl Carnitine)	3-hydroxybutyrylcarnitine (1)	0.235625	0.0285728	0.0217171	0.0546003	0.336758	0.258787
Lipid	Fatty Acid Metabolism(Acyl Carnitine)	3-hydroxybutyrylcarnitine (2)	0.37848	0.0427959	0.00335576	0.0156003	0.222833	0.222353
Lipid	Fatty Acid Metabolism(Acyl Carnitine)	acetylcarnitine (C2)	0.0152548	0.00273511	5.58805e-05	0.000860516	0.548771	0.321926
Lipid	Fatty Acid Metabolism(Acyl Carnitine)	adrenoylcarnitine (C22:4)*	0.0642303	0.0096352	0.00472259	0.0207784	0.111627	0.144732
Lipid	Fatty Acid Metabolism(Acyl Carnitine)	arachidonoylcarnitine (C20:4)	9.9384e-07	5.59073e-07	0.0185858	0.0487161	0.265573	0.234899
Lipid	Fatty Acid Metabolism(Acyl Carnitine)	arachidoylcarnitine (C20)*	0.000186087	5.546e-05	0.24512	0.218821	0.0723623	0.113664
Lipid	Fatty Acid Metabolism(Acyl Carnitine)	behenoylcarnitine (C22)*	0.716587	0.0693518	0.809643	0.447278	0.648852	0.340409
Lipid	Fatty Acid Metabolism(Acyl Carnitine)	cerotoylcarnitine (C26)*	0.0863332	0.0123112	0.00935352	0.0334394	0.255131	0.234195
Lipid	Fatty Acid Metabolism(Acyl Carnitine)	cis-4-decenoylcarnitine (C10:1)	0.00240364	0.000549093	0.88547	0.467171	0.835648	0.370623
Lipid	Fatty Acid Metabolism(Acyl Carnitine)	decanoylcarnitine (C10)	0.000355356	9.57609e-05	0.0898077	0.115247	0.279421	0.242039
Lipid	Fatty Acid Metabolism(Acyl Carnitine)	dihomo-linolenoylcarnitine (20:3n3 or 6)*	2.64362e-07	1.72422e-07	0.0134768	0.039065	0.336894	0.258787
Lipid	Fatty Acid Metabolism(Acyl Carnitine)	dihomo-linoleoylcarnitine (C20:2)*	0.000882218	0.000223048	0.0011905	0.0078317	0.186094	0.198701
Lipid	Fatty Acid Metabolism(Acyl Carnitine)	docosapentaenoylcarnitine (C22:5n3)*	6.86461e-06	2.94217e-06	0.0045386	0.0203319	0.878551	0.375711
Lipid	Fatty Acid Metabolism(Acyl Carnitine)	eicosenoylcarnitine (C20:1)*	0.000174676	5.27581e-05	0.00728702	0.0267975	0.426884	0.298327
Lipid	Fatty Acid Metabolism(Acyl Carnitine)	hexanoylcarnitine (C6)	0.0830157	0.011898	0.000642486	0.00510647	0.758911	0.355222
Lipid	Fatty Acid Metabolism(Acyl Carnitine)	laurylcarnitine (C12)	1.66954e-06	8.94459e-07	0.17301	0.176147	0.411493	0.292881
Lipid	Fatty Acid Metabolism(Acyl Carnitine)	linolenoylcarnitine (C18:3)*	0.00483036	0.00105015	0.105035	0.128115	0.140038	0.170697
Lipid	Fatty Acid Metabolism(Acyl Carnitine)	linoleoylcarnitine (C18:2)*	3.54321e-06	1.69633e-06	0.0589798	0.091974	0.299618	0.246122
Lipid	Fatty Acid Metabolism(Acyl Carnitine)	margaroylcarnitine*	7.92226e-06	3.27088e-06	0.807163	0.44691	0.393345	0.286279
Lipid	Fatty Acid Metabolism(Acyl Carnitine)	myristoleoylcarnitine (C14:1)*	1.61844e-05	6.16997e-06	0.357673	0.278001	0.91754	0.384311
Lipid	Fatty Acid Metabolism(Acyl Carnitine)	myristoylcarnitine (C14)	1.12307e-05	4.4727e-06	0.0724122	0.102972	0.804883	0.364026
Lipid	Fatty Acid Metabolism(Acyl Carnitine)	octanoylcarnitine (C8)	3.80586e-05	1.29754e-05	0.037771	0.0710405	0.875466	0.37518
Lipid	Fatty Acid Metabolism(Acyl Carnitine)	oleoylcarnitine (C18:1)	5.80252e-06	2.56011e-06	0.228566	0.214128	0.657581	0.340409
Lipid	Fatty Acid Metabolism(Acyl Carnitine)	palmitoleoylcarnitine (C16:1)*	3.12044e-06	1.54318e-06	0.0444023	0.0781441	0.316362	0.251559
Lipid	Fatty Acid Metabolism(Acyl Carnitine)	palmitoylcarnitine (C16)	2.15872e-06	1.12964e-06	0.0717941	0.102972	0.692857	0.343997
Lipid	Fatty Acid Metabolism(Acyl Carnitine)	pentadecanoylcarnitine (C15)*	2.52019e-06	1.30364e-06	0.471945	0.330345	0.513688	0.318801
Lipid	Fatty Acid Metabolism(Acyl Carnitine)	stearoylcarnitine (C18)	0.000106857	3.38653e-05	0.352822	0.27685	0.998996	0.405901
Lipid	Fatty Acid Synthesis	2-methylmalonylcarnitine (C4-DC)	0.566399	0.0577997	0.456748	0.32436	0.778061	0.359961
Lipid	Fatty Acid Synthesis	malonylcarnitine	0.925653	0.0839434	0.265736	0.230543	0.292219	0.245804
Lipid	Fatty Acid, Dicarboxylate	2-hydroxyglutarate	3.15126e-10	5.06487e-10	0.105002	0.128115	0.00733016	0.0271297
Lipid	Fatty Acid, Dicarboxylate	adipate	0.161098	0.0207929	0.449606	0.324072	0.899177	0.38178
Lipid	Fatty Acid, Dicarboxylate	azelate (nonanedioate)	0.216771	0.026654	0.0123288	0.0379708	0.411106	0.292881
Lipid	Fatty Acid, Monohydroxy	13-HODE + 9-HODE	0.0293032	0.00473949	0.314673	0.257791	0.488143	0.311782
Lipid	Fatty Acid, Monohydroxy	2-hydroxystearate	0.000287737	8.14406e-05	0.749274	0.421489	0.692604	0.343997
Lipid	Glycerolipid Metabolism	glycerol	7.12755e-10	9.43416e-10	0.0161153	0.0446137	0.0345151	0.0708785
Lipid	Glycerolipid Metabolism	glycerol 3-phosphate	0.0293828	0.00473949	0.000848831	0.00615122	6.43622e-05	0.0010918
Lipid	Glycerolipid Metabolism	glycerophosphoglycerol	4.66164e-11	1.23405e-10	0.0807315	0.106942	0.0456809	0.0885604
Lipid	Inositol Metabolism	inositol 1-phosphate (I1P)	7.91848e-09	6.98736e-09	0.0501236	0.0828849	0.0501236	0.0944741
Lipid	Inositol Metabolism	myo-inositol	0.126027	0.0168296	0.410603	0.306568	0.611778	0.336579
Lipid	Long Chain Fatty Acid	10-heptadecenoate (17:1n7)	0.508449	0.0535872	0.0453993	0.0793321	0.667122	0.340409
Lipid	Long Chain Fatty Acid	10-nonadecenoate (19:1n9)	0.0288696	0.00473949	0.185004	0.18391	0.699823	0.344931
Lipid	Long Chain Fatty Acid	eicosenoate (20:1)	0.131274	0.0174269	0.115805	0.13784	0.718109	0.345757
Lipid	Long Chain Fatty Acid	erucate (22:1n9)	0.395694	0.0440778	0.479099	0.333909	0.979516	0.40162
Lipid	Long Chain Fatty Acid	oleate/vaccenate (18:1)	0.00158577	0.000379599	0.0337024	0.0669666	0.710159	0.345472
Lipid	Lysolipid	1-arachidonoyl-GPC (20:4n6)*	0.000120259	3.77933e-05	0.0112549	0.0369743	0.0139957	0.0413292
Lipid	Lysolipid	1-arachidonoyl-GPE (20:4n6)*	0.202458	0.0253209	0.0208876	0.0530561	0.176729	0.196213
Lipid	Lysolipid	1-arachidonoyl-GPI (20:4)*	2.41519e-05	8.62628e-06	0.95213	0.480437	0.95213	0.395035
Lipid	Lysolipid	1-linoleoyl-GPC (18:2)	5.11479e-09	4.89747e-09	4.6371e-05	0.000761683	0.000102027	0.00138459
Lipid	Lysolipid	1-linoleoyl-GPE (18:2)*	0.0598426	0.00900702	0.114475	0.136919	0.0237401	0.0589335
Lipid	Lysolipid	1-oleoyl-GPC (18:1)	1.98971e-11	7.15674e-11	1.05212e-05	0.000463858	2.91612e-05	0.000659565
Lipid	Lysolipid	1-oleoyl-GPE (18:1)	0.605191	0.060658	0.0344377	0.0673642	0.049175	0.0939888
Lipid	Lysolipid	1-oleoyl-GPI (18:1)*	2.82537e-06	1.4418e-06	0.278796	0.237688	0.278796	0.242039
Lipid	Lysolipid	1-oleoyl-GPS (18:1)	0.000123983	3.84802e-05	0.0168065	0.0450099	0.0168065	0.0462317
Lipid	Lysolipid	1-palmitoyl-GPC (16:0)	5.53781e-12	3.11523e-11	7.4204e-05	0.00102514	0.000473313	0.0048174
Lipid	Lysolipid	1-palmitoyl-GPE (16:0)	2.81155e-08	2.18433e-08	0.93688	0.476934	0.559537	0.323173
Lipid	Lysolipid	1-palmitoyl-GPG (16:0)*	1.02758e-09	1.18575e-09	0.00124963	0.00789472	0.00124963	0.00820569
Lipid	Lysolipid	1-stearoyl-GPC (18:0)	6.33458e-11	1.58375e-10	0.000317323	0.00289572	0.00108309	0.00734916
Lipid	Lysolipid	1-stearoyl-GPE (18:0)	4.95195e-08	3.65333e-08	0.356596	0.278001	0.593577	0.333782
Lipid	Lysolipid	1-stearoyl-GPG (18:0)	1.85468e-10	3.21024e-10	1.44616e-05	0.000463858	1.44616e-05	0.000490637
Lipid	Lysolipid	1-stearoyl-GPI (18:0)	0.000411912	0.000109688	0.147417	0.161579	0.25575	0.234195
Lipid	Lysolipid	1-stearoyl-GPS (18:0)*	0.536444	0.0557543	0.812616	0.447916	0.363987	0.272019
Lipid	Lysolipid	2-palmitoyl-GPC (16:0)*	5.7921e-09	5.43046e-09	0.018042	0.0477993	0.00298324	0.0141226
Lipid	Lysoplasmalogen	1-(1-enyl-oleoyl)-2-linoleoyl-GPE (P-18:1/18:2)*	0.842099	0.0786245	0.959527	0.482219	0.872006	0.37518
Lipid	Lysoplasmalogen	1-(1-enyl-oleoyl)-2-oleoyl-GPE (P-18:1/18:1)*	0.42894	0.0464029	0.953268	0.480437	0.0517231	0.0958101
Lipid	Lysoplasmalogen	1-(1-enyl-oleoyl)-GPE (P-18:1)*	0.0281035	0.00465416	0.000551492	0.00468555	0.727698	0.345823
Lipid	Lysoplasmalogen	1-(1-enyl-palmitoyl)-GPC (P-16:0)*	0.0132969	0.00243252	0.528728	0.348688	0.777784	0.359961
Lipid	Lysoplasmalogen	1-(1-enyl-palmitoyl)-GPE (P-16:0)*	0.544143	0.0562944	0.165452	0.173469	0.706738	0.344998
Lipid	Lysoplasmalogen	1-(1-enyl-stearoyl)-GPE (P-18:0)*	0.0673873	0.00994306	0.494492	0.340326	0.483532	0.311782
Lipid	Medium Chain Fatty Acid	caproate (6:0)	0.553307	0.056721	0.537648	0.349525	0.671841	0.341901
Lipid	Medium Chain Fatty Acid	caprylate (8:0)	0.632371	0.0626842	0.119988	0.141452	0.83431	0.370623
Lipid	Medium Chain Fatty Acid	heptanoate (7:0)	0.308807	0.0362853	0.217717	0.207115	0.180994	0.196213
Lipid	Mevalonate Metabolism	3-hydroxy-3-methylglutarate	0.00794607	0.00159642	0.661907	0.390688	0.117594	0.14961
Lipid	Monoacylglycerol	1-oleoylglycerol (18:1)	0.039268	0.00611481	0.270836	0.233324	0.225935	0.224349
Lipid	Phosphatidylserine (PS)	1-stearoyl-2-arachidonoyl-GPS (18:0/20:4)	0.172081	0.0219279	0.953512	0.480437	0.800048	0.363523
Lipid	Phosphatidylserine (PS)	1-stearoyl-2-oleoyl-GPS (18:0/18:1)	0.000479533	0.000125468	0.603543	0.377425	0.324834	0.255425
Lipid	Phospholipid Metabolism	1,2-dilinoleoyl-GPC (18:2/18:2)	0.0815132	0.0117575	0.00936459	0.0334394	0.525685	0.320865
Lipid	Phospholipid Metabolism	1,2-dilinoleoyl-GPE (18:2/18:2)*	0.431294	0.0464343	0.314068	0.257791	0.273365	0.239855
Lipid	Phospholipid Metabolism	1,2-dioleoyl-GPE (18:1/18:1)	0.0365809	0.00577631	0.035764	0.068636	0.636943	0.338235
Lipid	Phospholipid Metabolism	1,2-dipalmitoyl-GPC (16:0/16:0)	0.368182	0.0417363	0.419947	0.309761	0.90868	0.383628
Lipid	Phospholipid Metabolism	1,2-dipalmitoyl-GPE (16:0/16:0)*	0.0086364	0.0017274	0.522633	0.348028	0.0406524	0.0803421
Lipid	Phospholipid Metabolism	1-linoleoyl-2-arachidonoyl-GPC (18:2/20:4n6)*	0.614178	0.0612102	0.0117849	0.0373269	0.248586	0.234195
Lipid	Phospholipid Metabolism	1-linoleoyl-2-linolenoyl-GPC (18:2/18:3)*	0.0101738	0.0019735	0.660766	0.390688	0.560351	0.323173
Lipid	Phospholipid Metabolism	1-oleoyl-2-arachidonoyl-GPE (18:1/20:4)*	0.00107568	0.000268938	0.735274	0.41551	0.0726399	0.113664
Lipid	Phospholipid Metabolism	1-oleoyl-2-linoleoyl-GPC (18:1/18:2)*	0.0588542	0.00888798	0.00181991	0.00974788	0.0224572	0.0581998
Lipid	Phospholipid Metabolism	1-oleoyl-2-linoleoyl-GPE (18:1/18:2)*	0.00581384	0.00122836	0.00283217	0.0134195	0.535442	0.321926
Lipid	Phospholipid Metabolism	1-palmitoyl-2-alpha-linolenoyl-GPC (16:0/18:3n3)*	7.01395e-06	2.97782e-06	0.334382	0.267283	0.102258	0.137853
Lipid	Phospholipid Metabolism	1-palmitoyl-2-arachidonoyl-GPA (16:0/20:4)*	0.862159	0.0799478	0.0727195	0.102972	0.326255	0.255425
Lipid	Phospholipid Metabolism	1-palmitoyl-2-arachidonoyl-GPC (16:0/20:4n6)	0.803694	0.0751947	0.0816701	0.107035	0.519229	0.319704
Lipid	Phospholipid Metabolism	1-palmitoyl-2-arachidonoyl-GPE (16:0/20:4)*	0.0351018	0.00556227	0.856077	0.45751	0.170371	0.191607
Lipid	Phospholipid Metabolism	1-palmitoyl-2-arachidonoyl-GPI (16:0/20:4)*	0.0746226	0.0108681	0.0301846	0.0648495	0.780202	0.360133
Lipid	Phospholipid Metabolism	1-palmitoyl-2-linoleoyl-GPA (16:0/18:2)*	0.414747	0.0455241	0.250519	0.222833	0.578794	0.329106
Lipid	Phospholipid Metabolism	1-palmitoyl-2-linoleoyl-GPC (16:0/18:2)	0.0803909	0.0116329	0.559639	0.360822	0.938607	0.390723
Lipid	Phospholipid Metabolism	1-palmitoyl-2-linoleoyl-GPE (16:0/18:2)	2.28173e-05	8.21479e-06	0.862859	0.458185	0.233874	0.227788
Lipid	Phospholipid Metabolism	1-palmitoyl-2-linoleoyl-GPI (16:0/18:2)	0.343027	0.0394541	0.0965854	0.122038	0.785063	0.360741
Lipid	Phospholipid Metabolism	1-palmitoyl-2-oleoyl-GPC (16:0/18:1)	0.0416129	0.00639149	0.570856	0.364764	0.798371	0.363523
Lipid	Phospholipid Metabolism	1-palmitoyl-2-oleoyl-GPE (16:0/18:1)	2.85136e-06	1.4418e-06	0.941254	0.477547	0.177866	0.196213
Lipid	Phospholipid Metabolism	1-palmitoyl-2-oleoyl-GPG (16:0/18:1)	3.51199e-06	1.69633e-06	0.569239	0.364764	0.529623	0.320865
Lipid	Phospholipid Metabolism	1-palmitoyl-2-oleoyl-GPI (16:0/18:1)*	0.639323	0.0630018	0.141774	0.157951	0.449676	0.30604
Lipid	Phospholipid Metabolism	1-palmitoyl-2-palmitoleoyl-GPC (16:0/16:1)*	0.00109777	0.000272945	0.349952	0.276359	0.322009	0.255052
Lipid	Phospholipid Metabolism	1-palmitoyl-2-stearoyl-GPC (16:0/18:0)	0.592811	0.0598133	0.980036	0.485477	0.441242	0.304474
Lipid	Phospholipid Metabolism	1-palmitoyl-2-stearoyl-GPE (16:0/18:0)*	0.00013937	4.29594e-05	0.862737	0.458185	7.38565e-05	0.00110423
Lipid	Phospholipid Metabolism	1-stearoyl-2-arachidonoyl-GPC (18:0/20:4)	0.00103594	0.000260448	0.0432932	0.0778607	0.163715	0.188283
Lipid	Phospholipid Metabolism	1-stearoyl-2-arachidonoyl-GPE (18:0/20:4)	0.0343262	0.0054586	0.890815	0.467987	0.429404	0.298327
Lipid	Phospholipid Metabolism	1-stearoyl-2-arachidonoyl-GPI (18:0/20:4)	0.637824	0.0630018	0.0265698	0.0632203	0.637265	0.338235
Lipid	Phospholipid Metabolism	1-stearoyl-2-linoleoyl-GPA (18:0/18:2)*	0.54831	0.0565888	0.06343	0.0970706	0.915806	0.384311
Lipid	Phospholipid Metabolism	1-stearoyl-2-linoleoyl-GPC (18:0/18:2)*	0.917894	0.0834506	0.297394	0.250015	0.816815	0.367046
Lipid	Phospholipid Metabolism	1-stearoyl-2-linoleoyl-GPE (18:0/18:2)*	0.00514173	0.00111247	0.12709	0.147011	0.874051	0.37518
Lipid	Phospholipid Metabolism	1-stearoyl-2-linoleoyl-GPI (18:0/18:2)	0.000339813	9.32477e-05	0.241335	0.21861	0.478751	0.311782
Lipid	Phospholipid Metabolism	1-stearoyl-2-linoleoyl-GPS (18:0/18:2)	1.44308e-05	5.69674e-06	0.904049	0.470565	0.159402	0.185417
Lipid	Phospholipid Metabolism	1-stearoyl-2-oleoyl-GPC (18:0/18:1)	1.82407e-05	6.67387e-06	0.577375	0.365702	0.367484	0.272019
Lipid	Phospholipid Metabolism	1-stearoyl-2-oleoyl-GPE (18:0/18:1)	3.35333e-07	2.15586e-07	0.966601	0.48308	0.060819	0.102317
Lipid	Phospholipid Metabolism	choline	0.671963	0.0654778	0.0421875	0.0764299	0.266563	0.234899
Lipid	Phospholipid Metabolism	choline phosphate	8.50849e-10	1.06363e-09	0.818254	0.448705	0.639712	0.338235
Lipid	Phospholipid Metabolism	cytidine 5'-diphosphocholine	5.28687e-08	3.8375e-08	0.15121	0.161984	0.00107347	0.00734916
Lipid	Phospholipid Metabolism	cytidine-5'-diphosphoethanolamine	1.06192e-07	7.35228e-08	0.385318	0.292116	0.0655169	0.107554
Lipid	Phospholipid Metabolism	glycerophosphoethanolamine	0.0131747	0.00242	0.53265	0.349039	0.966182	0.398939
Lipid	Phospholipid Metabolism	glycerophosphoinositol*	2.06736e-11	7.15674e-11	0.616037	0.381367	0.864963	0.374623
Lipid	Phospholipid Metabolism	glycerophosphorylcholine (GPC)	4.04473e-05	1.34834e-05	0.378635	0.289724	0.310298	0.248679
Lipid	Phospholipid Metabolism	phosphoethanolamine	4.24124e-13	4.77172e-12	0.0164001	0.0448977	0.0324938	0.0697576
Lipid	Phospholipid Metabolism	trimethylamine N-oxide	0.00686855	0.00141792	3.13536e-05	0.000643762	0.00812696	0.0290233
Lipid	Plasmalogen	1-(1-enyl-palmitoyl)-2-arachidonoyl-GPC (P-16:0/20:4)*	0.0281299	0.00465416	0.257391	0.224886	0.619288	0.337715
Lipid	Plasmalogen	1-(1-enyl-palmitoyl)-2-arachidonoyl-GPE (P-16:0/20:4)*	0.894344	0.0819718	0.3542	0.277049	0.621751	0.337715
Lipid	Plasmalogen	1-(1-enyl-palmitoyl)-2-linoleoyl-GPC (P-16:0/18:2)*	0.259634	0.0309856	0.424804	0.309761	0.195645	0.202161
Lipid	Plasmalogen	1-(1-enyl-palmitoyl)-2-linoleoyl-GPE (P-16:0/18:2)*	0.679202	0.0660176	0.45628	0.32436	0.236865	0.228514
Lipid	Plasmalogen	1-(1-enyl-palmitoyl)-2-oleoyl-GPC (P-16:0/18:1)*	0.0242193	0.00411299	0.203744	0.195331	0.106317	0.139625
Lipid	Plasmalogen	1-(1-enyl-palmitoyl)-2-oleoyl-GPE (P-16:0/18:1)*	0.8706	0.080451	0.833075	0.452113	0.166816	0.189705
Lipid	Plasmalogen	1-(1-enyl-palmitoyl)-2-palmitoleoyl-GPC (P-16:0/16:1)*	0.0156536	0.00278442	0.0118167	0.0373269	0.546988	0.321926
Lipid	Plasmalogen	1-(1-enyl-palmitoyl)-2-palmitoyl-GPC (P-16:0/16:0)*	0.243386	0.0292864	0.782281	0.437063	0.162798	0.188283
Lipid	Plasmalogen	1-(1-enyl-stearoyl)-2-arachidonoyl-GPE (P-18:0/20:4)*	0.71271	0.0691253	0.331638	0.266161	0.519871	0.319704
Lipid	Plasmalogen	1-(1-enyl-stearoyl)-2-linoleoyl-GPE (P-18:0/18:2)*	0.095369	0.0133704	0.513426	0.347533	0.675369	0.34284
Lipid	Plasmalogen	1-(1-enyl-stearoyl)-2-oleoyl-GPE (P-18:0/18:1)	0.101398	0.0139548	0.681944	0.39628	0.141592	0.171563
Lipid	Polyunsaturated Fatty Acid (n3 and n6)	arachidonate (20:4n6)	0.00607398	0.00127138	0.199854	0.193799	0.928005	0.387101
Lipid	Polyunsaturated Fatty Acid (n3 and n6)	dihomo-linoleate (20:2n6)	0.107145	0.0146117	0.627185	0.385071	0.182093	0.196213
Lipid	Polyunsaturated Fatty Acid (n3 and n6)	dihomo-linolenate (20:3n3 or n6)	0.000214845	6.33696e-05	0.0666944	0.099592	0.731923	0.34649
Lipid	Polyunsaturated Fatty Acid (n3 and n6)	docosahexaenoate (DHA; 22:6n3)	0.00404418	0.000896554	0.171019	0.174842	0.968792	0.399207
Lipid	Polyunsaturated Fatty Acid (n3 and n6)	docosapentaenoate (n3 DPA; 22:5n3)	0.000105137	3.35566e-05	0.267404	0.231176	0.569422	0.325596
Lipid	Polyunsaturated Fatty Acid (n3 and n6)	docosapentaenoate (n6 DPA; 22:5n6)	0.0037726	0.000840487	0.733647	0.41551	0.358378	0.270499
Lipid	Polyunsaturated Fatty Acid (n3 and n6)	eicosapentaenoate (EPA; 20:5n3)	0.000217283	6.34959e-05	0.124653	0.144873	0.583183	0.329759
Lipid	Polyunsaturated Fatty Acid (n3 and n6)	linoleate (18:2n6)	0.00155477	0.000376179	0.0127608	0.0383426	0.587995	0.331559
Lipid	Polyunsaturated Fatty Acid (n3 and n6)	linolenate [alpha or gamma; (18:3n3 or 6)]	0.0127103	0.00236365	0.00510574	0.0213219	0.428298	0.298327
Lipid	Polyunsaturated Fatty Acid (n3 and n6)	mead acid (20:3n9)	0.000215442	6.33696e-05	0.0468653	0.0809333	0.72783	0.345823
Lipid	Primary Bile Acid Metabolism	chenodeoxycholate	0.977166	0.087918	0.186897	0.184197	0.726069	0.345823
Lipid	Primary Bile Acid Metabolism	cholate	0.236146	0.0285728	0.453496	0.32436	0.313942	0.250613
Lipid	Primary Bile Acid Metabolism	glycochenodeoxycholate	0.541699	0.0561707	0.0133149	0.039065	0.892335	0.380009
Lipid	Primary Bile Acid Metabolism	glycocholate	0.385475	0.0433689	0.374394	0.288269	0.793497	0.362977
Lipid	Secondary Bile Acid Metabolism	deoxycholate	0.781355	0.0740281	0.424937	0.309761	0.861254	0.374365
Lipid	Secondary Bile Acid Metabolism	glycodeoxycholate	0.343266	0.0394541	0.656014	0.390688	0.638339	0.338235
Lipid	Sphingolipid Metabolism	behenoyl dihydrosphingomyelin (d18:0/22:0)*	0.486336	0.0517414	0.402863	0.301704	0.117414	0.14961
Lipid	Sphingolipid Metabolism	behenoyl sphingomyelin (d18:1/22:0)*	0.172488	0.0219279	0.725374	0.412756	0.190984	0.200929
Lipid	Sphingolipid Metabolism	glycosyl-N-palmitoyl-sphingosine (d18:1/16:0)	0.876487	0.080829	0.841242	0.45456	0.153756	0.180917
Lipid	Sphingolipid Metabolism	glycosyl-N-stearoyl-sphingosine (d18:1/18:0)	0.908976	0.082975	0.664394	0.390688	0.299435	0.246122
Lipid	Sphingolipid Metabolism	lactosyl-N-nervonoyl-sphingosine (d18:1/24:1)*	7.65746e-06	3.22064e-06	0.289898	0.246301	0.712801	0.345472
Lipid	Sphingolipid Metabolism	lactosyl-N-palmitoyl-sphingosine (d18:1/16:0)	0.0461176	0.00703536	0.243917	0.218821	0.686669	0.343997
Lipid	Sphingolipid Metabolism	lignoceroyl sphingomyelin (d18:1/24:0)	0.790872	0.0742272	0.38281	0.291814	0.000841195	0.00658594
Lipid	Sphingolipid Metabolism	myristoyl dihydrosphingomyelin (d18:0/14:0)*	0.0875161	0.0124243	0.599143	0.375859	0.0714009	0.11355
Lipid	Sphingolipid Metabolism	N-behenoyl-sphingadienine (d18:2/22:0)*	0.729893	0.070488	0.176809	0.178539	0.297052	0.246122
Lipid	Sphingolipid Metabolism	N-palmitoyl-sphingadienine (d18:2/16:0)*	9.95845e-09	8.45586e-09	0.078747	0.106606	0.448983	0.30604
Lipid	Sphingolipid Metabolism	N-palmitoyl-sphinganine (d18:0/16:0)	0.0111629	0.00213772	0.528213	0.348688	0.0894707	0.127362
Lipid	Sphingolipid Metabolism	N-palmitoyl-sphingosine (d18:1/16:0)	0.149673	0.0196377	0.0676779	0.100452	0.806518	0.364026
Lipid	Sphingolipid Metabolism	N-stearoyl-sphingadienine (d18:2/18:0)*	0.0188873	0.00326918	0.150111	0.161579	0.601898	0.335679
Lipid	Sphingolipid Metabolism	N-stearoyl-sphinganine (d18:0/18:0)*	0.23854	0.0287802	0.536351	0.349525	0.00764196	0.0277786
Lipid	Sphingolipid Metabolism	N-stearoyl-sphingosine (d18:1/18:0)*	0.426223	0.04622	0.239335	0.218405	0.0233839	0.058766
Lipid	Sphingolipid Metabolism	N-tetracosadienoyl-sphingosine (d18:1/24:2)*	0.0939845	0.0132589	0.480474	0.333909	0.192478	0.200929
Lipid	Sphingolipid Metabolism	palmitoyl dihydrosphingomyelin (d18:0/16:0)*	0.740854	0.070787	0.699909	0.40481	0.23889	0.229381
Lipid	Sphingolipid Metabolism	palmitoyl sphingomyelin (d18:1/16:0)	0.0253446	0.00428791	0.800773	0.444802	0.46182	0.308855
Lipid	Sphingolipid Metabolism	sphinganine	5.48624e-05	1.81542e-05	0.149062	0.161579	0.604769	0.336252
Lipid	Sphingolipid Metabolism	sphinganine-1-phosphate	0.893539	0.0819718	0.129718	0.147967	0.545718	0.321926
Lipid	Sphingolipid Metabolism	sphingomyelin (d17:2/16:0, d18:2/15:0)*	0.862338	0.0799478	0.321241	0.261492	0.449793	0.30604
Lipid	Sphingolipid Metabolism	sphingomyelin (d18:0/18:0, d19:0/17:0)*	0.0377865	0.00594582	0.711519	0.408647	0.241691	0.23098
Lipid	Sphingolipid Metabolism	sphingomyelin (d18:0/20:0, d16:0/22:0)*	0.327881	0.03803	0.132909	0.150216	0.149514	0.177984
Lipid	Sphingolipid Metabolism	sphingomyelin (d18:1/14:0, d16:1/16:0)*	0.442293	0.0475049	0.560883	0.360822	0.495295	0.312145
Lipid	Sphingolipid Metabolism	sphingomyelin (d18:1/15:0, d16:1/17:0)*	0.246008	0.029523	0.588363	0.370756	0.403343	0.290123
Lipid	Sphingolipid Metabolism	sphingomyelin (d18:1/17:0, d17:1/18:0, d19:1/16:0)	0.786126	0.0742272	0.277506	0.23741	0.657557	0.340409
Lipid	Sphingolipid Metabolism	sphingomyelin (d18:1/18:1, d18:2/18:0)	0.0212138	0.0036578	0.57598	0.365702	0.543721	0.321926
Lipid	Sphingolipid Metabolism	sphingomyelin (d18:1/19:0, d19:1/18:0)*	0.0656833	0.00972987	0.516817	0.347677	0.685348	0.343997
Lipid	Sphingolipid Metabolism	sphingomyelin (d18:1/20:0, d16:1/22:0)*	0.104813	0.0143809	0.137649	0.154863	0.689896	0.343997
Lipid	Sphingolipid Metabolism	sphingomyelin (d18:1/20:1, d18:2/20:0)*	0.0119584	0.00225316	0.718246	0.411551	0.286542	0.245079
Lipid	Sphingolipid Metabolism	sphingomyelin (d18:1/21:0, d17:1/22:0, d16:1/23:0)*	0.393613	0.0439548	0.36762	0.284834	0.904005	0.382578
Lipid	Sphingolipid Metabolism	sphingomyelin (d18:1/22:1, d18:2/22:0, d16:1/24:1)*	0.052522	0.00795842	0.911483	0.472263	0.795283	0.362979
Lipid	Sphingolipid Metabolism	sphingomyelin (d18:1/22:2, d18:2/22:1, d16:1/24:2)*	0.0173544	0.00301544	0.468547	0.329841	0.8357	0.370623
Lipid	Sphingolipid Metabolism	sphingomyelin (d18:1/24:1, d18:2/24:0)*	0.310264	0.0363615	0.936591	0.476934	0.367169	0.272019
Lipid	Sphingolipid Metabolism	sphingomyelin (d18:1/25:0, d19:0/24:1, d20:1/23:0, d19:1/24:0)*	0.978754	0.087918	0.673911	0.394403	0.0677633	0.110241
Lipid	Sphingolipid Metabolism	sphingomyelin (d18:2/14:0, d18:1/14:1)*	0.593333	0.0598133	0.65712	0.390688	0.447326	0.30604
Lipid	Sphingolipid Metabolism	sphingomyelin (d18:2/16:0, d18:1/16:1)*	0.970595	0.0875345	0.456812	0.32436	0.416974	0.294721
Lipid	Sphingolipid Metabolism	sphingomyelin (d18:2/18:1)*	0.125815	0.0168296	0.0192813	0.0500071	0.00370496	0.0169143
Lipid	Sphingolipid Metabolism	sphingomyelin (d18:2/21:0, d16:2/23:0)*	0.098054	0.0135776	0.927513	0.475708	0.862529	0.374365
Lipid	Sphingolipid Metabolism	sphingomyelin (d18:2/23:0, d18:1/23:1, d17:1/24:1)*	0.405936	0.0448854	0.423939	0.309761	0.120581	0.152457
Lipid	Sphingolipid Metabolism	sphingomyelin (d18:2/23:1)*	0.210522	0.0260279	0.467092	0.329758	0.569001	0.325596
Lipid	Sphingolipid Metabolism	sphingomyelin (d18:2/24:1, d18:1/24:2)*	0.0829261	0.011898	0.647756	0.390218	0.70323	0.34494
Lipid	Sphingolipid Metabolism	sphingomyelin (d18:2/24:2)*	0.160014	0.0207929	0.168361	0.174294	0.851868	0.373473
Lipid	Sphingolipid Metabolism	sphingosine 1-phosphate	0.0164362	0.0029007	0.508326	0.345982	0.28475	0.244741
Lipid	Sphingolipid Metabolism	stearoyl sphingomyelin (d18:1/18:0)	0.00700971	0.00144045	0.88929	0.467987	0.614855	0.33736
Lipid	Sphingolipid Metabolism	tricosanoyl sphingomyelin (d18:1/23:0)*	0.616141	0.0612102	0.64508	0.389588	0.0175807	0.0477166
Lipid	Sterol	4-cholesten-3-one	0.416389	0.0455931	0.234761	0.216637	0.180178	0.196213
Lipid	Sterol	7-hydroxycholesterol (alpha or beta)	0.0078097	0.00157606	0.00637304	0.0249244	0.623799	0.337715
Lipid	Sterol	beta-sitosterol	0.552583	0.056721	0.599513	0.375859	0.0830962	0.120822
Lipid	Sterol	campesterol	0.116455	0.0157856	0.298328	0.250015	0.0141668	0.0413292
Lipid	Sterol	cholesterol	0.41917	0.0457863	0.924111	0.475708	0.48442	0.311782
Nucleotide	Purine and Pyrimidine Metabolism	methylphosphate	0.00729298	0.00148986	0.845266	0.454723	0.000980291	0.00734916
Nucleotide	Purine Metabolism, (Hypo)Xanthine/Inosine containing	AICA ribonucleotide	0.173566	0.0220028	0.373224	0.288269	0.633979	0.338235
Nucleotide	Purine Metabolism, (Hypo)Xanthine/Inosine containing	hypoxanthine	0.0290724	0.00473949	0.0273639	0.063605	0.834608	0.370623
Nucleotide	Purine Metabolism, (Hypo)Xanthine/Inosine containing	inosine	0.0047132	0.00102965	0.0544092	0.0876193	0.0199019	0.0533058
Nucleotide	Purine Metabolism, (Hypo)Xanthine/Inosine containing	inosine 5'-monophosphate (IMP)	0.00183641	0.000436518	0.243254	0.218821	0.758699	0.355222
Nucleotide	Purine Metabolism, (Hypo)Xanthine/Inosine containing	xanthine	6.53894e-09	6.00556e-09	0.969887	0.483741	0.0305945	0.0684377
Nucleotide	Purine Metabolism, Adenine containing	2'-deoxyadenosine 5'-monophosphate	0.260261	0.0309856	0.138999	0.155672	0.254052	0.234195
Nucleotide	Purine Metabolism, Adenine containing	adenine	0.504927	0.0533409	0.149613	0.161579	0.699432	0.344931
Nucleotide	Purine Metabolism, Adenine containing	adenosine	0.0325088	0.00520638	0.0917893	0.11718	0.103295	0.138334
Nucleotide	Purine Metabolism, Adenine containing	adenosine 5'-diphosphate (ADP)	0.197825	0.0249376	0.076851	0.104614	0.384746	0.282741
Nucleotide	Purine Metabolism, Adenine containing	adenosine 5'-monophosphate (AMP)	0.038538	0.00604296	0.323606	0.262278	0.358785	0.270499
Nucleotide	Purine Metabolism, Adenine containing	adenylosuccinate	6.57305e-07	3.89045e-07	0.303923	0.252983	0.18644	0.198701
Nucleotide	Purine Metabolism, Guanine containing	7-methylguanine	5.06934e-06	2.31299e-06	0.0605462	0.0932365	0.052466	0.0958101
Nucleotide	Purine Metabolism, Guanine containing	guanine	1.80823e-10	3.21024e-10	0.00506656	0.0213219	0.189991	0.200929
Nucleotide	Purine Metabolism, Guanine containing	guanosine	4.83353e-06	2.24251e-06	0.0122557	0.0379708	0.0122557	0.0395998
Nucleotide	Purine Metabolism, Guanine containing	guanosine 5'- monophosphate (5'-GMP)	1.78268e-08	1.45865e-08	0.155088	0.165419	0.2053	0.207916
Nucleotide	Pyrimidine Metabolism, Cytidine containing	2'-O-methylcytidine	2.68225e-11	8.0473e-11	2.83047e-05	0.000637615	2.83047e-05	0.000659565
Nucleotide	Pyrimidine Metabolism, Cytidine containing	3-methylcytidine	0.000302348	8.4513e-05	0.0223007	0.0555013	0.342681	0.26126
Nucleotide	Pyrimidine Metabolism, Cytidine containing	cytidine	0.52948	0.0552858	0.00027485	0.00270879	0.0258618	0.0620684
Nucleotide	Pyrimidine Metabolism, Cytidine containing	cytidine 5'-monophosphate (5'-CMP)	6.65653e-07	3.89045e-07	0.0741607	0.10382	0.00996424	0.0338055
Nucleotide	Pyrimidine Metabolism, Cytidine containing	cytosine	0.000495303	0.000128845	0.00264129	0.0127604	0.00476189	0.0190065
Nucleotide	Pyrimidine Metabolism, Orotate containing	dihydroorotate	9.47665e-08	6.66372e-08	3.65182e-05	0.000692126	1.89751e-07	1.82553e-05
Nucleotide	Pyrimidine Metabolism, Orotate containing	N-carbamoylaspartate	7.65324e-09	6.88838e-09	8.79378e-06	0.000463858	2.69039e-07	1.82553e-05
Nucleotide	Pyrimidine Metabolism, Orotate containing	orotate	1.15103e-14	2.58999e-13	1.50611e-05	0.000463858	2.19228e-06	0.000111566
Nucleotide	Pyrimidine Metabolism, Orotate containing	orotidine	0.015224	0.00273511	0.38824	0.293428	0.488593	0.311782
Nucleotide	Pyrimidine Metabolism, Thymine containing	3-aminoisobutyrate	0.48805	0.0518012	0.0302681	0.0648495	0.327499	0.255425
Nucleotide	Pyrimidine Metabolism, Thymine containing	thymidine	9.806e-11	2.10143e-10	0.000147531	0.00165227	0.000147531	0.00187698
Nucleotide	Pyrimidine Metabolism, Uracil containing	2'-deoxyuridine	2.81517e-08	2.18433e-08	0.170193	0.174723	0.307605	0.247784
Nucleotide	Pyrimidine Metabolism, Uracil containing	3-ureidopropionate	0.202554	0.0253209	0.465255	0.329406	0.981133	0.40162
Nucleotide	Pyrimidine Metabolism, Uracil containing	5-methyluridine (ribothymidine)	0.0295099	0.00474298	0.0295099	0.0648495	0.0295099	0.0682237
Nucleotide	Pyrimidine Metabolism, Uracil containing	pseudouridine	0.000184077	5.52268e-05	0.0760739	0.104614	0.0760739	0.115565
Nucleotide	Pyrimidine Metabolism, Uracil containing	uridine	3.46177e-11	9.73687e-11	0.0344493	0.0673642	0.0734535	0.113664
Nucleotide	Pyrimidine Metabolism, Uracil containing	uridine 5'-diphosphate (UDP)	0.00208006	0.000487546	0.00727835	0.0267975	0.00727835	0.0271297
Nucleotide	Pyrimidine Metabolism, Uracil containing	uridine 5'-monophosphate (UMP)	1.19979e-11	5.54305e-11	0.001992	0.0103848	2.01296e-05	0.00058537
Peptide	Acetylated Peptides	phenylacetylglutamine	0.219455	0.0269105	0.000219554	0.00225398	0.39378	0.286279
Peptide	Acetylated Peptides	phenylacetylglycine	0.481972	0.0513986	0.195751	0.190635	0.633013	0.338235
Peptide	Dipeptide	glycylleucine	0.009954	0.00194765	0.483989	0.334969	0.483989	0.311782
Peptide	Dipeptide	glycylvaline	0.00046016	0.000121815	0.878887	0.464693	0.712533	0.345472
Peptide	Dipeptide	histidylalanine	0.0678551	0.00997936	0.470599	0.330342	0.470599	0.311025
Peptide	Dipeptide	leucylalanine	0.425886	0.04622	0.231603	0.214527	0.706181	0.344998
Peptide	Dipeptide	phenylalanylalanine	0.0103795	0.00200475	0.311362	0.257436	0.0137039	0.0413292
Peptide	Dipeptide	valylleucine	2.70443e-09	2.83041e-09	0.694229	0.402469	0.0137873	0.0413292
Peptide	Dipeptide Derivative	carnosine	1.67697e-05	6.23708e-06	0.0848394	0.110018	0.993528	0.404487
Peptide	Gamma-glutamyl Amino Acid	gamma-glutamylalanine	0.0404396	0.00623406	0.849026	0.455474	0.633399	0.338235
Peptide	Gamma-glutamyl Amino Acid	gamma-glutamylcysteine	0.00121506	0.000299376	0.81479	0.448112	0.628099	0.338235
Peptide	Gamma-glutamyl Amino Acid	gamma-glutamyl-epsilon-lysine	0.791703	0.0742272	0.987333	0.486515	0.00373915	0.0169143
Peptide	Gamma-glutamyl Amino Acid	gamma-glutamylglutamate	0.000354398	9.57609e-05	0.5307	0.348688	0.303748	0.247325
Peptide	Gamma-glutamyl Amino Acid	gamma-glutamylglutamine	0.0790482	0.0114755	0.205822	0.196558	0.78297	0.360593
Peptide	Gamma-glutamyl Amino Acid	gamma-glutamylhistidine	0.459595	0.0491286	0.335205	0.267283	0.0430544	0.0842711
Peptide	Gamma-glutamyl Amino Acid	gamma-glutamylisoleucine*	6.34771e-10	8.92707e-10	0.150176	0.161579	0.548469	0.321926
Peptide	Gamma-glutamyl Amino Acid	gamma-glutamylleucine	0.00024155	6.92388e-05	0.190955	0.186702	0.548356	0.321926
Peptide	Gamma-glutamyl Amino Acid	gamma-glutamylthreonine	0.325003	0.0377936	0.415864	0.308088	0.493811	0.312145
Peptide	Gamma-glutamyl Amino Acid	gamma-glutamylvaline	8.48864e-07	4.83563e-07	0.787956	0.439237	0.201432	0.205019
Xenobiotics	Benzoate Metabolism	3-ethylphenylsulfate	0.400565	0.0444005	0.110441	0.133389	0.54315	0.321926
Xenobiotics	Benzoate Metabolism	4-ethylphenylsulfate	0.739889	0.070787	0.0235292	0.0579731	0.367214	0.272019
Xenobiotics	Benzoate Metabolism	4-methylcatechol sulfate	0.0923091	0.0130635	0.201523	0.193956	0.606255	0.336252
Xenobiotics	Benzoate Metabolism	benzoate	0.614958	0.0612102	0.182734	0.183769	0.233653	0.227788
Xenobiotics	Benzoate Metabolism	catechol sulfate	0.430943	0.0464343	0.128818	0.147967	0.900244	0.38178
Xenobiotics	Benzoate Metabolism	hippurate	0.322737	0.0376273	0.0515303	0.0846429	0.129378	0.161573
Xenobiotics	Benzoate Metabolism	p-hydroxybenzaldehyde	0.236185	0.0285728	0.703163	0.40574	0.439194	0.304091
Xenobiotics	Chemical	4-acetamidobenzoate	7.8642e-07	4.53734e-07	0.0293192	0.0648495	0.00441113	0.0180366
Xenobiotics	Chemical	benzoylcarnitine*	0.00223522	0.000518515	0.640493	0.388694	0.0543056	0.0958101
Xenobiotics	Chemical	glycerol 2-phosphate	2.69879e-13	4.04845e-12	0.000596483	0.00489887	0.000596483	0.00527915
Xenobiotics	Chemical	HEPES	0.660409	0.0647504	0.0805637	0.106942	0.766505	0.357049
Xenobiotics	Chemical	lanthionine	0.425108	0.04622	0.0654196	0.098887	0.634659	0.338235
Xenobiotics	Chemical	N-methylpipecolate	0.863378	0.0799478	0.825598	0.450038	0.685748	0.343997
Xenobiotics	Chemical	phenol red	0.284588	0.0337035	0.106847	0.129683	0.213752	0.215404
Xenobiotics	Chemical	succinimide	0.0220792	0.00379248	0.010074	0.0349592	0.0527811	0.0958101
Xenobiotics	Chemical	sulfate*	0.156556	0.0204811	0.0541983	0.0876193	0.803876	0.364026
Xenobiotics	Chemical	thioproline	0.000388955	0.000104191	0.0795953	0.106942	0.544045	0.321926
Xenobiotics	Chemical	trizma acetate	0.0947726	0.0133283	0.499262	0.342652	0.245559	0.23358
Xenobiotics	Drug	S-carboxymethyl-L-cysteine	0.198532	0.0249569	0.240962	0.21861	0.501079	0.313846
Xenobiotics	Food Component/Plant	2-keto-3-deoxy-gluconate	0.00889228	0.00177071	0.229445	0.214138	0.111241	0.144732
Xenobiotics	Food Component/Plant	alliin	0.00440206	0.000971108	0.0666138	0.099592	0.914356	0.384311
Xenobiotics	Food Component/Plant	beta-guanidinopropanoate	0.158591	0.0206872	0.231497	0.214527	0.236232	0.228514
Xenobiotics	Food Component/Plant	betonicine	0.314274	0.0367358	0.103976	0.128115	0.105812	0.139625
Xenobiotics	Food Component/Plant	cinnamoylglycine	0.0864461	0.0123112	0.301259	0.251615	0.982541	0.40162
Xenobiotics	Food Component/Plant	ergothioneine	0.167592	0.0214877	0.481102	0.333909	0.0682371	0.110241
Xenobiotics	Food Component/Plant	erythritol	0.0171694	0.00300518	0.376467	0.288962	0.566129	0.325541
Xenobiotics	Food Component/Plant	gluconate	0.029153	0.00473949	0.169537	0.174723	0.230944	0.227788
Xenobiotics	Food Component/Plant	homostachydrine*	0.519633	0.0545106	0.896758	0.469109	0.259456	0.234195
Xenobiotics	Food Component/Plant	phytanate	0.16125	0.0207929	0.0705391	0.102972	0.61916	0.337715
Xenobiotics	Food Component/Plant	pyrraline	0.00212908	0.000496451	0.291886	0.247138	0.963029	0.398445
Xenobiotics	Food Component/Plant	quinate	0.00266502	0.000602684	0.0359319	0.068636	0.284945	0.244741
Xenobiotics	Food Component/Plant	stachydrine	0.00133493	0.000326499	0.307068	0.25474	0.254058	0.234195

## Sheet: t_32h_40h
Additional file 9 (Sheet 3): Results of two-way ANOVA performed on data from uRBC and iRBC cultures at 32 and 40 h time points. Columns D, E, and F show p-values of treatment, time, and interaction effects. In our case, the treatment effect corresponds to parasite-infection.
Major pathway	Subordinate pathway	Biochemical name	treatment		time		interaction
			p-value	q-value	p-value	q-value	p-value	q-value
Amino Acid	Alanine and Aspartate Metabolism	3-sulfo-L-alanine	0.0082674	0.00261358	0.74557	0.699236	0.00136837	0.0299771
Amino Acid	Alanine and Aspartate Metabolism	alanine	7.38549e-09	1.04004e-08	0.278179	0.534928	0.0735806	0.293945
Amino Acid	Alanine and Aspartate Metabolism	asparagine	0.0389096	0.0108599	0.651888	0.670849	0.778269	0.57517
Amino Acid	Alanine and Aspartate Metabolism	aspartate	3.22809e-07	3.12528e-07	0.895026	0.743571	0.575949	0.532227
Amino Acid	Alanine and Aspartate Metabolism	N-acetylalanine	1.97311e-07	1.99332e-07	0.569561	0.657983	0.586822	0.538859
Amino Acid	Alanine and Aspartate Metabolism	N-acetylasparagine	0.00408897	0.00138324	0.674043	0.680562	0.692156	0.560265
Amino Acid	Alanine and Aspartate Metabolism	N-acetylaspartate (NAA)	1.2419e-11	3.20627e-11	0.303248	0.547528	0.010666	0.090869
Amino Acid	Creatine Metabolism	creatine	0.00324702	0.00111909	0.96681	0.752995	0.418254	0.487964
Amino Acid	Creatine Metabolism	creatine phosphate	3.33911e-05	1.75336e-05	0.0324782	0.246884	0.000707768	0.0180894
Amino Acid	Creatine Metabolism	creatinine	0.000625238	0.000249404	0.874749	0.737187	0.48116	0.51063
Amino Acid	Creatine Metabolism	guanidinoacetate	0.145829	0.0357617	0.145829	0.417852	0.145829	0.375126
Amino Acid	Glutamate Metabolism	4-hydroxyglutamate	0.828538	0.159434	0.673942	0.680562	0.883736	0.586684
Amino Acid	Glutamate Metabolism	beta-citrylglutamate	8.35722e-12	2.28453e-11	5.12161e-05	0.00389321	0.00046789	0.0159447
Amino Acid	Glutamate Metabolism	carboxyethyl-GABA	0.00612534	0.00201168	0.263898	0.527901	0.519384	0.517117
Amino Acid	Glutamate Metabolism	glutamate	4.12841e-09	6.39508e-09	0.198191	0.463652	0.516066	0.517117
Amino Acid	Glutamate Metabolism	glutamate, gamma-methyl ester	0.500363	0.104977	0.796808	0.721066	0.567487	0.529023
Amino Acid	Glutamate Metabolism	glutamine	0.0182209	0.00545856	0.54504	0.64853	0.786656	0.577978
Amino Acid	Glutamate Metabolism	N-acetylglutamate	0.775548	0.150451	0.521443	0.638999	0.771349	0.573576
Amino Acid	Glutamate Metabolism	N-acetylglutamine	0.118727	0.0295048	0.31349	0.54908	0.876278	0.586684
Amino Acid	Glutamate Metabolism	pyroglutamine*	0.167245	0.0399593	0.352975	0.570343	0.454263	0.498412
Amino Acid	Glutamate Metabolism	S-1-pyrroline-5-carboxylate	0.0013936	0.000519991	0.850667	0.733148	0.42582	0.487964
Amino Acid	Glutathione Metabolism	4-hydroxy-nonenal-glutathione	0.164968	0.0396189	0.142911	0.417852	0.807457	0.580873
Amino Acid	Glutathione Metabolism	5-oxoproline	0.17376	0.0411982	0.00194243	0.046142	0.279403	0.446318
Amino Acid	Glutathione Metabolism	cysteine-glutathione disulfide	0.397162	0.0850536	0.26247	0.527822	0.619597	0.541601
Amino Acid	Glutathione Metabolism	cysteinylglycine	0.00708274	0.00228572	0.0203499	0.198321	0.0034515	0.045233
Amino Acid	Glutathione Metabolism	glutathione, oxidized (GSSG)	0.2411	0.0547883	0.117651	0.402716	0.471163	0.505758
Amino Acid	Glutathione Metabolism	glutathione, reduced (GSH)	2.86927e-05	1.55045e-05	0.0381575	0.255331	0.00716655	0.0666057
Amino Acid	Glutathione Metabolism	ophthalmate	2.14637e-05	1.20902e-05	0.269256	0.528193	0.735244	0.565163
Amino Acid	Glutathione Metabolism	S-lactoylglutathione	9.44987e-06	5.81652e-06	0.22294	0.476034	0.0769377	0.293945
Amino Acid	Glutathione Metabolism	S-methylglutathione	0.975729	0.181236	0.636806	0.666763	0.0963846	0.328458
Amino Acid	Glutathione Metabolism	S-nitrosoglutathione (GSNO)	8.99273e-06	5.57205e-06	0.0830622	0.362182	0.0830622	0.302045
Amino Acid	Glycine, Serine and Threonine Metabolism	betaine	0.000584428	0.00023413	0.592695	0.660614	0.513984	0.517117
Amino Acid	Glycine, Serine and Threonine Metabolism	dimethylglycine	0.30256	0.066954	0.847267	0.733148	0.848743	0.583262
Amino Acid	Glycine, Serine and Threonine Metabolism	glycine	0.00026904	0.000117395	0.513198	0.635357	0.308125	0.451587
Amino Acid	Glycine, Serine and Threonine Metabolism	N-acetylglycine	9.12948e-05	4.35137e-05	0.441579	0.61953	0.555807	0.528575
Amino Acid	Glycine, Serine and Threonine Metabolism	N-acetylserine	8.67882e-14	6.72193e-13	0.295389	0.547528	0.515977	0.517117
Amino Acid	Glycine, Serine and Threonine Metabolism	N-acetylthreonine	1.74591e-05	1.01418e-05	0.179512	0.445937	0.99802	0.610965
Amino Acid	Glycine, Serine and Threonine Metabolism	serine	0.00433597	0.00145486	0.942095	0.749885	0.111985	0.354559
Amino Acid	Glycine, Serine and Threonine Metabolism	threonine	4.81881e-07	4.22521e-07	0.118	0.402716	0.287278	0.447728
Amino Acid	Guanidino and Acetamido Metabolism	4-guanidinobutanoate	0.00112593	0.000434218	0.290391	0.546389	0.496215	0.517117
Amino Acid	Histidine Metabolism	4-imidazoleacetate	0.635898	0.127926	0.159252	0.423272	0.0702952	0.293945
Amino Acid	Histidine Metabolism	formiminoglutamate	1.45611e-06	1.1567e-06	0.677869	0.680562	0.613549	0.541601
Amino Acid	Histidine Metabolism	histidine	4.05603e-07	3.77831e-07	0.198842	0.463652	0.448972	0.498412
Amino Acid	Histidine Metabolism	imidazole lactate	5.54949e-08	6.69848e-08	0.191283	0.463072	0.201595	0.424567
Amino Acid	Histidine Metabolism	N-acetylhistidine	0.000506358	0.000206413	0.733393	0.696159	0.421036	0.487964
Amino Acid	Leucine, Isoleucine and Valine Metabolism	2-methylbutyrylcarnitine (C5)	4.49177e-05	2.28129e-05	0.0603287	0.318465	0.883136	0.586684
Amino Acid	Leucine, Isoleucine and Valine Metabolism	3-methyl-2-oxobutyrate	4.58185e-06	3.15444e-06	0.926391	0.749314	0.206137	0.424567
Amino Acid	Leucine, Isoleucine and Valine Metabolism	3-methyl-2-oxovalerate	3.06304e-08	3.84711e-08	0.0413584	0.257694	0.332038	0.46222
Amino Acid	Leucine, Isoleucine and Valine Metabolism	3-methylglutaconate	2.20044e-05	1.23201e-05	0.0211949	0.200572	0.00438574	0.0493334
Amino Acid	Leucine, Isoleucine and Valine Metabolism	4-methyl-2-oxopentanoate	1.80297e-09	2.93988e-09	0.15212	0.418205	0.0290359	0.178106
Amino Acid	Leucine, Isoleucine and Valine Metabolism	beta-hydroxyisovalerate	0.655971	0.131679	0.474342	0.6286	0.283043	0.447472
Amino Acid	Leucine, Isoleucine and Valine Metabolism	isobutyrylcarnitine (C4)	0.000110958	5.18226e-05	0.244102	0.502971	0.827652	0.580873
Amino Acid	Leucine, Isoleucine and Valine Metabolism	isobutyrylglycine	3.17868e-05	1.6979e-05	0.192992	0.463652	0.0184903	0.143088
Amino Acid	Leucine, Isoleucine and Valine Metabolism	isoleucine	0.172092	0.0409071	0.562154	0.653398	0.39238	0.485201
Amino Acid	Leucine, Isoleucine and Valine Metabolism	isovalerylcarnitine (C5)	8.79415e-05	4.21567e-05	0.691007	0.683946	0.855999	0.583262
Amino Acid	Leucine, Isoleucine and Valine Metabolism	isovalerylglycine	3.30007e-07	3.16203e-07	0.136478	0.417852	0.859843	0.583262
Amino Acid	Leucine, Isoleucine and Valine Metabolism	leucine	0.000327125	0.00013883	0.175993	0.443423	0.603754	0.539775
Amino Acid	Leucine, Isoleucine and Valine Metabolism	methylsuccinate	0.759147	0.14883	0.710173	0.689613	0.857448	0.583262
Amino Acid	Leucine, Isoleucine and Valine Metabolism	N-acetylisoleucine	0.00122447	0.000468077	0.966757	0.752995	0.71488	0.562607
Amino Acid	Leucine, Isoleucine and Valine Metabolism	N-acetylleucine	0.242435	0.0548237	0.772432	0.707429	0.454756	0.498412
Amino Acid	Leucine, Isoleucine and Valine Metabolism	N-acetylvaline	5.89849e-09	8.56594e-09	0.505008	0.635357	0.701134	0.560265
Amino Acid	Leucine, Isoleucine and Valine Metabolism	tiglylcarnitine (C5:1-DC)	0.494415	0.1042	0.793961	0.721066	0.387704	0.485201
Amino Acid	Leucine, Isoleucine and Valine Metabolism	valine	2.53944e-08	3.27808e-08	0.0500066	0.287169	0.260807	0.439503
Amino Acid	Lysine Metabolism	2-aminoadipate	0.000120444	5.54175e-05	0.0981551	0.400396	0.129134	0.372304
Amino Acid	Lysine Metabolism	glutarylcarnitine (C5-DC)	0.622716	0.126093	0.152944	0.418205	0.638357	0.545361
Amino Acid	Lysine Metabolism	lysine	8.37957e-09	1.14532e-08	0.107112	0.402716	0.52268	0.517117
Amino Acid	Lysine Metabolism	N6,N6,N6-trimethyllysine	0.00532867	0.00175624	0.205806	0.469769	0.845708	0.583262
Amino Acid	Lysine Metabolism	N6-acetyllysine	6.88737e-14	6.2588e-13	0.0191579	0.191617	0.0191579	0.143088
Amino Acid	Lysine Metabolism	pipecolate	1.55843e-12	5.79378e-12	0.882012	0.741663	0.228716	0.429847
Amino Acid	Methionine, Cysteine, SAM and Taurine Metabolism	cysteine	0.0306293	0.00860048	0.67741	0.680562	0.51005	0.517117
Amino Acid	Methionine, Cysteine, SAM and Taurine Metabolism	cysteine sulfinic acid	0.000300168	0.00012976	0.746928	0.699236	0.00377327	0.0462906
Amino Acid	Methionine, Cysteine, SAM and Taurine Metabolism	hypotaurine	0.457166	0.0965685	0.228436	0.485045	0.113292	0.354559
Amino Acid	Methionine, Cysteine, SAM and Taurine Metabolism	methionine	0.165742	0.0397021	0.444994	0.61953	0.627798	0.544039
Amino Acid	Methionine, Cysteine, SAM and Taurine Metabolism	methionine sulfoxide	7.82622e-08	8.87059e-08	0.477395	0.6286	0.887497	0.586684
Amino Acid	Methionine, Cysteine, SAM and Taurine Metabolism	N-acetylcysteine	0.782427	0.151187	0.604177	0.662001	0.268062	0.445523
Amino Acid	Methionine, Cysteine, SAM and Taurine Metabolism	N-acetylmethionine	1.62176e-11	4.07378e-11	0.35186	0.570343	0.425631	0.487964
Amino Acid	Methionine, Cysteine, SAM and Taurine Metabolism	N-acetylmethionine sulfoxide	0.425147	0.0904215	0.496035	0.634128	0.775614	0.574592
Amino Acid	Methionine, Cysteine, SAM and Taurine Metabolism	N-formylmethionine	1.24685e-06	1.0077e-06	0.000321328	0.0122129	0.00456119	0.0493334
Amino Acid	Methionine, Cysteine, SAM and Taurine Metabolism	S-adenosylhomocysteine (SAH)	0.000131235	5.97363e-05	0.819781	0.722264	0.163928	0.386258
Amino Acid	Methionine, Cysteine, SAM and Taurine Metabolism	taurine	0.0030959	0.00107366	0.0119769	0.142254	0.179609	0.402088
Amino Acid	Phenylalanine and Tyrosine Metabolism	3-(4-hydroxyphenyl)lactate	2.66661e-12	8.85146e-12	0.577397	0.658274	0.184089	0.406189
Amino Acid	Phenylalanine and Tyrosine Metabolism	3-phenylpropionate (hydrocinnamate)	0.756172	0.148585	0.707707	0.689613	0.293481	0.447728
Amino Acid	Phenylalanine and Tyrosine Metabolism	4-hydroxyphenylpyruvate	1.73903e-07	1.77616e-07	0.196566	0.463652	0.697029	0.560265
Amino Acid	Phenylalanine and Tyrosine Metabolism	N-acetylphenylalanine	0.0823104	0.0213096	0.448696	0.622405	0.259549	0.439503
Amino Acid	Phenylalanine and Tyrosine Metabolism	N-formylphenylalanine	1.39015e-07	1.46823e-07	0.0623705	0.318852	0.940495	0.597882
Amino Acid	Phenylalanine and Tyrosine Metabolism	p-cresol sulfate	0.0949749	0.0241181	0.140174	0.417852	0.705665	0.560265
Amino Acid	Phenylalanine and Tyrosine Metabolism	phenol sulfate	0.174737	0.0413245	0.281077	0.536837	0.420713	0.487964
Amino Acid	Phenylalanine and Tyrosine Metabolism	phenylalanine	1.43326e-07	1.49675e-07	0.0575156	0.31229	0.156345	0.375126
Amino Acid	Phenylalanine and Tyrosine Metabolism	phenyllactate (PLA)	0.578466	0.118684	0.870914	0.737187	0.500806	0.517117
Amino Acid	Phenylalanine and Tyrosine Metabolism	phenylpyruvate	3.36135e-06	2.45994e-06	0.718489	0.690866	0.769344	0.573576
Amino Acid	Phenylalanine and Tyrosine Metabolism	p-toluic acid	0.628388	0.126852	0.678881	0.680562	0.369671	0.480416
Amino Acid	Phenylalanine and Tyrosine Metabolism	tyrosine	7.20545e-05	3.5247e-05	0.309003	0.547528	0.985503	0.610267
Amino Acid	Polyamine Metabolism	5-methylthioadenosine (MTA)	1.03981e-10	2.05623e-10	0.0885062	0.373768	0.47492	0.505758
Amino Acid	Polyamine Metabolism	N(1)-acetylspermine	0.3087	0.0681506	0.00167348	0.042538	0.967005	0.602807
Amino Acid	Polyamine Metabolism	N(4)-acetylspermidine	1.197e-14	1.58932e-13	0.00288906	0.0610036	0.00288906	0.045233
Amino Acid	Polyamine Metabolism	N1,N12-diacetylspermine	1.32071e-09	2.23182e-09	0.310655	0.547528	0.310655	0.451587
Amino Acid	Polyamine Metabolism	putrescine	9.49234e-14	6.78648e-13	0.0381329	0.255331	0.0381329	0.20485
Amino Acid	Polyamine Metabolism	spermidine	9.5812e-13	4.4525e-12	0.417773	0.607984	0.630271	0.54452
Amino Acid	Polyamine Metabolism	spermine	7.84263e-11	1.61981e-10	0.00213547	0.0477436	0.0259835	0.169781
Amino Acid	Tryptophan Metabolism	3-indoxyl sulfate	0.0834996	0.0215574	0.469069	0.6286	0.0333019	0.192712
Amino Acid	Tryptophan Metabolism	C-glycosyltryptophan	0.7652	0.149098	0.682216	0.680562	0.144378	0.375126
Amino Acid	Tryptophan Metabolism	indolelactate	2.83007e-05	1.53821e-05	0.382337	0.585957	0.634335	0.544961
Amino Acid	Tryptophan Metabolism	kynurenine	0.282023	0.0630095	0.419821	0.607984	0.397665	0.485201
Amino Acid	Tryptophan Metabolism	tryptophan	1.9337e-06	1.51028e-06	0.0674813	0.324659	0.0738249	0.293945
Amino Acid	Tryptophan Metabolism	tryptophan betaine	0.000804388	0.000312811	0.581598	0.658274	0.933476	0.596642
Amino Acid	Urea cycle; Arginine and Proline Metabolism	2-oxoarginine*	6.78894e-06	4.47504e-06	0.734836	0.696159	0.546825	0.526116
Amino Acid	Urea cycle; Arginine and Proline Metabolism	argininate*	0.387932	0.0834616	0.306011	0.547528	0.0440146	0.220033
Amino Acid	Urea cycle; Arginine and Proline Metabolism	arginine	1.80332e-05	1.0346e-05	0.00672778	0.105234	0.0226141	0.159242
Amino Acid	Urea cycle; Arginine and Proline Metabolism	argininosuccinate	5.26487e-10	9.4102e-10	0.0623941	0.318852	0.99489	0.610267
Amino Acid	Urea cycle; Arginine and Proline Metabolism	citrulline	0.0563876	0.0151468	0.177634	0.444175	0.396839	0.485201
Amino Acid	Urea cycle; Arginine and Proline Metabolism	dimethylarginine (SDMA + ADMA)	3.64962e-08	4.52273e-08	0.635471	0.666763	0.972822	0.603978
Amino Acid	Urea cycle; Arginine and Proline Metabolism	homocitrulline	0.206856	0.0478252	0.588589	0.658274	0.732152	0.565163
Amino Acid	Urea cycle; Arginine and Proline Metabolism	N-acetylarginine	0.323502	0.0709129	0.244818	0.502971	0.698513	0.560265
Amino Acid	Urea cycle; Arginine and Proline Metabolism	N-acetylproline	0.0116604	0.00358857	0.665648	0.6801	0.508344	0.517117
Amino Acid	Urea cycle; Arginine and Proline Metabolism	N-alpha-acetylornithine	0.0883554	0.0226225	0.70998	0.689613	0.259426	0.439503
Amino Acid	Urea cycle; Arginine and Proline Metabolism	N-delta-acetylornithine	0.287005	0.0639687	0.444528	0.61953	0.354406	0.480416
Amino Acid	Urea cycle; Arginine and Proline Metabolism	N-monomethylarginine	1.80271e-11	4.40917e-11	0.503732	0.635357	0.036449	0.199624
Amino Acid	Urea cycle; Arginine and Proline Metabolism	ornithine	0.374388	0.0813004	0.204813	0.469769	0.492693	0.517117
Amino Acid	Urea cycle; Arginine and Proline Metabolism	proline	2.87883e-06	2.14053e-06	0.498972	0.634272	0.225682	0.429847
Amino Acid	Urea cycle; Arginine and Proline Metabolism	trans-4-hydroxyproline	0.878292	0.166934	0.41263	0.607984	0.1383	0.375126
Amino Acid	Urea cycle; Arginine and Proline Metabolism	urea	0.762317	0.148848	0.308002	0.547528	0.367894	0.480416
Carbohydrate	Advanced Glycation End-product	N6-carboxymethyllysine	8.33076e-06	5.26722e-06	0.422919	0.607984	0.240608	0.439503
Carbohydrate	Aminosugar Metabolism	erythronate*	8.54565e-07	7.09156e-07	0.924653	0.749314	0.0195946	0.143088
Carbohydrate	Aminosugar Metabolism	N-acetylglucosamine/N-acetylgalactosamine	2.42641e-05	1.33442e-05	0.976364	0.753499	0.333063	0.46222
Carbohydrate	Aminosugar Metabolism	N-acetylglucosaminylasparagine	0.0604991	0.0161579	0.822982	0.722392	0.278812	0.446318
Carbohydrate	Aminosugar Metabolism	N-acetylneuraminate	0.525866	0.109341	0.808074	0.721904	0.572496	0.532076
Carbohydrate	Disaccharides and Oligosaccharides	lactose	0.00132932	0.000500205	0.531662	0.643541	0.121445	0.372304
Carbohydrate	Fructose, Mannose and Galactose Metabolism	fructose	0.000398941	0.000164794	0.933741	0.749885	0.251461	0.439503
Carbohydrate	Fructose, Mannose and Galactose Metabolism	galactonate	0.378062	0.0819069	0.37429	0.584675	0.256238	0.439503
Carbohydrate	Fructose, Mannose and Galactose Metabolism	mannitol/sorbitol	1.04728e-16	3.20413e-15	0.0521942	0.291732	0.00264262	0.0450273
Carbohydrate	Fructose, Mannose and Galactose Metabolism	mannose	0.0268833	0.00780814	0.320788	0.552834	0.026018	0.169781
Carbohydrate	Fructose, Mannose and Galactose Metabolism	mannose-6-phosphate	1.48869e-05	8.8666e-06	0.907223	0.749314	0.67614	0.556725
Carbohydrate	Glycogen Metabolism	maltose	0.225773	0.0519405	0.355123	0.570343	0.390992	0.485201
Carbohydrate	Glycolysis, Gluconeogenesis, and Pyruvate Metabolism	2,3-diphosphoglycerate	2.65893e-09	4.26081e-09	0.000365814	0.0126397	0.000386884	0.0148322
Carbohydrate	Glycolysis, Gluconeogenesis, and Pyruvate Metabolism	2-phosphoglycerate	0.000123825	5.66928e-05	0.350388	0.570343	0.642459	0.545824
Carbohydrate	Glycolysis, Gluconeogenesis, and Pyruvate Metabolism	3-phosphoglycerate	0.000377155	0.000157192	0.217794	0.475952	0.188749	0.413496
Carbohydrate	Glycolysis, Gluconeogenesis, and Pyruvate Metabolism	dihydroxyacetone phosphate (DHAP)	3.97108e-05	2.03913e-05	0.221945	0.476034	0.174929	0.402088
Carbohydrate	Glycolysis, Gluconeogenesis, and Pyruvate Metabolism	fructose-6-phosphate	1.18644e-11	3.15059e-11	0.196647	0.463652	0.652234	0.546776
Carbohydrate	Glycolysis, Gluconeogenesis, and Pyruvate Metabolism	glucose	0.00878785	0.00275005	0.167322	0.432621	0.156551	0.375126
Carbohydrate	Glycolysis, Gluconeogenesis, and Pyruvate Metabolism	glucose 6-phosphate	0.000513169	0.000208276	0.506832	0.635357	0.824841	0.580873
Carbohydrate	Glycolysis, Gluconeogenesis, and Pyruvate Metabolism	glycerate	0.454462	0.0962161	0.00354765	0.0642085	0.367434	0.480416
Carbohydrate	Glycolysis, Gluconeogenesis, and Pyruvate Metabolism	Isobar: fructose 1,6-diphosphate, glucose 1,6-diphosphate, myo-inositol 1,4 or 1,3-diphosphate	1.9515e-06	1.51148e-06	0.0689576	0.327614	0.222441	0.429847
Carbohydrate	Glycolysis, Gluconeogenesis, and Pyruvate Metabolism	lactate	1.78696e-10	3.32169e-10	0.00988436	0.125227	0.255772	0.439503
Carbohydrate	Glycolysis, Gluconeogenesis, and Pyruvate Metabolism	phosphoenolpyruvate (PEP)	7.81627e-06	5.0101e-06	0.973716	0.753499	0.53519	0.524847
Carbohydrate	Glycolysis, Gluconeogenesis, and Pyruvate Metabolism	pyruvate	3.18842e-14	3.3286e-13	0.107648	0.402716	0.625814	0.544039
Carbohydrate	Nucleotide Sugar	UDP-galactose	4.10586e-07	3.77831e-07	0.0583657	0.312442	0.0141516	0.114218
Carbohydrate	Nucleotide Sugar	UDP-glucose	0.00045555	0.000187345	0.0400875	0.255527	0.0228453	0.159242
Carbohydrate	Nucleotide Sugar	UDP-glucuronate	1.57745e-07	1.62903e-07	0.648317	0.670849	0.850938	0.583262
Carbohydrate	Nucleotide Sugar	UDP-N-acetylgalactosamine	0.0280368	0.00801787	0.803459	0.721904	0.680702	0.556725
Carbohydrate	Nucleotide Sugar	UDP-N-acetylglucosamine	0.000182942	8.09673e-05	0.60714	0.662001	0.0791008	0.293945
Carbohydrate	Pentose Metabolism	arabitol/xylitol	5.29583e-12	1.64069e-11	0.0115975	0.142191	0.0512495	0.245598
Carbohydrate	Pentose Metabolism	arabonate/xylonate	0.00508714	0.0016826	0.629378	0.666726	0.496879	0.517117
Carbohydrate	Pentose Metabolism	ribitol	2.11634e-11	4.99915e-11	0.454484	0.625864	0.368354	0.480416
Carbohydrate	Pentose Metabolism	ribonate	5.73292e-09	8.45765e-09	0.131152	0.415398	0.861483	0.583262
Carbohydrate	Pentose Metabolism	ribulose/xylulose	0.191525	0.0449515	0.414374	0.607984	0.243433	0.439503
Carbohydrate	Pentose Phosphate Pathway	6-phosphogluconate	0.237354	0.0543357	0.984373	0.754899	0.700978	0.560265
Carbohydrate	Pentose Phosphate Pathway	ribulose/xylulose 5-phosphate	9.12849e-08	9.98147e-08	0.588864	0.658274	0.0896507	0.31972
Carbohydrate	Pentose Phosphate Pathway	sedoheptulose-7-phosphate	1.00407e-10	2.02871e-10	0.319874	0.552834	0.558389	0.528575
Cofactors and Vitamins	Ascorbate and Aldarate Metabolism	gulonate*	0.000178388	7.93293e-05	0.234363	0.494865	0.652493	0.546776
Cofactors and Vitamins	Ascorbate and Aldarate Metabolism	threonate	7.06933e-06	4.62705e-06	0.00466602	0.0772837	0.422561	0.487964
Cofactors and Vitamins	Biotin Metabolism	biotin	0.197601	0.0460023	0.0149199	0.16202	0.23045	0.429847
Cofactors and Vitamins	Hemoglobin and Porphyrin Metabolism	biliverdin	0.0261662	0.00764766	0.378584	0.584675	0.586418	0.538859
Cofactors and Vitamins	Hemoglobin and Porphyrin Metabolism	heme	4.80572e-07	4.22521e-07	0.0362495	0.255331	0.00105871	0.0249774
Cofactors and Vitamins	Nicotinate and Nicotinamide Metabolism	1-methylnicotinamide	0.0140857	0.00429234	0.425503	0.607984	0.522324	0.517117
Cofactors and Vitamins	Nicotinate and Nicotinamide Metabolism	nicotinamide	5.32834e-07	4.54339e-07	0.413014	0.607984	0.13618	0.375126
Cofactors and Vitamins	Nicotinate and Nicotinamide Metabolism	nicotinamide adenine dinucleotide (NAD+)	0.842387	0.16143	0.40388	0.604398	0.214824	0.429847
Cofactors and Vitamins	Nicotinate and Nicotinamide Metabolism	nicotinamide ribonucleotide (NMN)	0.0271032	0.0078231	0.149182	0.418205	0.0278041	0.1768
Cofactors and Vitamins	Nicotinate and Nicotinamide Metabolism	nicotinamide riboside	2.13809e-06	1.64231e-06	0.0990254	0.400396	0.231033	0.429847
Cofactors and Vitamins	Nicotinate and Nicotinamide Metabolism	nicotinate adenine dinucleotide (NAAD+)	3.22555e-13	1.87369e-12	0.000149727	0.00711344	0.000149727	0.0107209
Cofactors and Vitamins	Nicotinate and Nicotinamide Metabolism	nicotinate ribonucleoside	3.74359e-16	6.95878e-15	0.000647609	0.0189339	0.000647609	0.0180566
Cofactors and Vitamins	Nicotinate and Nicotinamide Metabolism	nicotinic acid mononucleotide (NaMN)	5.16589e-18	3.97481e-16	0.250645	0.512174	0.428061	0.487964
Cofactors and Vitamins	Nicotinate and Nicotinamide Metabolism	trigonelline (N'-methylnicotinate)	0.00664464	0.00215933	0.217702	0.475952	0.612579	0.541601
Cofactors and Vitamins	Pantothenate and CoA Metabolism	pantothenate	7.4205e-07	6.21333e-07	0.598832	0.662001	0.319223	0.45318
Cofactors and Vitamins	Riboflavin Metabolism	riboflavin (Vitamin B2)	0.00409276	0.00138324	0.100854	0.401925	0.795513	0.580873
Cofactors and Vitamins	Thiamine Metabolism	thiamin (Vitamin B1)	0.00744173	0.00237681	0.00692838	0.105234	0.231251	0.429847
Cofactors and Vitamins	Tocopherol Metabolism	alpha-tocopherol	0.56719	0.116887	0.329468	0.559031	0.0100851	0.0883742
Cofactors and Vitamins	Vitamin B6 Metabolism	pyridoxal	0.682523	0.136127	0.0403383	0.255527	0.419786	0.487964
Cofactors and Vitamins	Vitamin B6 Metabolism	pyridoxal phosphate	1.24789e-09	2.14782e-09	0.288983	0.546389	0.0017487	0.033949
Cofactors and Vitamins	Vitamin B6 Metabolism	pyridoxamine	0.000107291	5.03631e-05	7.42973e-05	0.00403409	0.425096	0.487964
Cofactors and Vitamins	Vitamin B6 Metabolism	pyridoxate	0.95491	0.178216	0.940301	0.749885	0.89014	0.586684
Cofactors and Vitamins	Vitamin B6 Metabolism	pyridoxine (Vitamin B6)	7.28982e-06	4.738e-06	0.213829	0.475952	0.160001	0.380407
Cofactors and Vitamins	Vitamin B6 Metabolism	pyridoxine phosphate	8.1173e-05	3.92939e-05	0.914619	0.749314	0.993522	0.610267
Energy	Oxidative Phosphorylation	acetylphosphate	0.00358258	0.00122869	0.970096	0.753499	0.439061	0.493261
Energy	Oxidative Phosphorylation	phosphate	0.00763488	0.00243015	0.995638	0.756836	0.67991	0.556725
Energy	TCA Cycle	2-methylcitrate/homocitrate	0.0520786	0.0141117	0.88746	0.74227	0.900243	0.586684
Energy	TCA Cycle	aconitate [cis or trans]	0.0131511	0.00402071	0.425029	0.607984	0.902884	0.586684
Energy	TCA Cycle	alpha-ketoglutarate	4.4889e-06	3.11351e-06	0.86178	0.7344	0.205311	0.424567
Energy	TCA Cycle	citrate	0.0436329	0.0119981	0.9891	0.756405	0.298387	0.447728
Energy	TCA Cycle	fumarate	7.33675e-12	2.06635e-11	0.91845	0.749314	0.00177106	0.033949
Energy	TCA Cycle	malate	1.12382e-12	4.74775e-12	0.695393	0.6865	0.0941124	0.328004
Energy	TCA Cycle	succinate	8.09383e-08	9.06339e-08	0.395456	0.598818	0.484042	0.511917
Energy	TCA Cycle	succinylcarnitine (C4-DC)	0.0115378	0.00356262	0.401657	0.604398	0.671679	0.555268
Energy	TCA Cycle	tricarballylate	0.000520429	0.000210304	0.941971	0.749885	0.725278	0.565163
Lipid	Carnitine Metabolism	carnitine	0.0285096	0.00812809	0.491165	0.634128	0.207321	0.424567
Lipid	Carnitine Metabolism	deoxycarnitine	0.00144611	0.000535478	0.406474	0.604398	0.802178	0.580873
Lipid	Ceramides	ceramide (d16:1/24:1, d18:1/22:1)*	0.529774	0.109907	0.333257	0.559936	0.5638	0.528801
Lipid	Ceramides	ceramide (d18:1/14:0, d16:1/16:0)*	4.88661e-07	4.24461e-07	0.157533	0.421927	0.0771657	0.293945
Lipid	Ceramides	ceramide (d18:1/17:0, d17:1/18:0)*	0.156862	0.0380658	0.189774	0.463072	0.418371	0.487964
Lipid	Ceramides	ceramide (d18:1/20:0, d16:1/22:0, d20:1/18:0)*	0.163417	0.0393483	0.912573	0.749314	0.00190655	0.0343966
Lipid	Diacylglycerol	diacylglycerol (16:1/18:2 [2], 16:0/18:3 [1])*	5.20629e-05	2.6156e-05	0.285236	0.542057	0.285236	0.447728
Lipid	Diacylglycerol	oleoyl-oleoyl-glycerol (18:1/18:1) [2]*	2.36321e-07	2.31203e-07	0.114063	0.402716	0.198663	0.424567
Lipid	Diacylglycerol	palmitoyl-arachidonoyl-glycerol (16:0/20:4) [1]*	1.64518e-12	5.88105e-12	0.219144	0.475952	0.651535	0.546776
Lipid	Diacylglycerol	palmitoyl-arachidonoyl-glycerol (16:0/20:4) [2]*	3.89477e-11	8.41836e-11	0.97737	0.753499	0.128372	0.372304
Lipid	Diacylglycerol	palmitoyl-linolenoyl-glycerol (16:0/18:3) [2]*	2.0457e-05	1.15934e-05	0.0130232	0.145583	0.0130232	0.107952
Lipid	Diacylglycerol	palmitoyl-oleoyl-glycerol (16:0/18:1) [2]*	8.55327e-18	3.97481e-16	4.54956e-05	0.00389321	4.54956e-05	0.00465118
Lipid	Diacylglycerol	stearoyl-arachidonoyl-glycerol (18:0/20:4) [1]*	1.50692e-13	1.00041e-12	0.616064	0.664317	0.616064	0.541601
Lipid	Diacylglycerol	stearoyl-arachidonoyl-glycerol (18:0/20:4) [2]*	5.56263e-12	1.66776e-11	0.029659	0.234848	0.029659	0.178361
Lipid	Diacylglycerol	stearoyl-linoleoyl-glycerol (18:0/18:2) [2]*	2.05322e-07	2.05195e-07	0.759077	0.703676	0.555876	0.528575
Lipid	Endocannabinoid	linoleoyl ethanolamide	0.000260049	0.000114007	0.776356	0.709314	0.310813	0.451587
Lipid	Endocannabinoid	oleoyl ethanolamide	3.67688e-05	1.89855e-05	0.479625	0.6286	0.104411	0.344333
Lipid	Endocannabinoid	palmitoyl ethanolamide	0.000131758	5.97363e-05	0.378986	0.584675	0.129379	0.372304
Lipid	Endocannabinoid	stearoyl ethanolamide	5.91715e-05	2.92529e-05	0.02796	0.234848	0.901014	0.586684
Lipid	Fatty Acid Metabolism (Acyl Choline)	oleoylcholine	1.93833e-05	1.10523e-05	0.206542	0.469769	0.271349	0.445523
Lipid	Fatty Acid Metabolism (Acyl Choline)	palmitoylcholine	1.27055e-06	1.018e-06	0.641376	0.667868	0.0327991	0.192712
Lipid	Fatty Acid Metabolism (Acyl Choline)	stearoylcholine*	0.000361123	0.000151872	0.648258	0.670849	0.417802	0.487964
Lipid	Fatty Acid Metabolism (also BCAA Metabolism)	butyrylcarnitine (C4)	0.00856456	0.00269835	0.00747564	0.105234	0.308909	0.451587
Lipid	Fatty Acid Metabolism (also BCAA Metabolism)	methylmalonate (MMA)	0.601224	0.1227	0.130982	0.415398	0.129887	0.372304
Lipid	Fatty Acid Metabolism (also BCAA Metabolism)	propionylcarnitine (C3)	0.000368179	0.000154142	0.197336	0.463652	0.389147	0.485201
Lipid	Fatty Acid Metabolism(Acyl Carnitine)	3-hydroxybutyrylcarnitine (1)	0.0182652	0.00545856	0.352597	0.570343	0.730624	0.565163
Lipid	Fatty Acid Metabolism(Acyl Carnitine)	3-hydroxybutyrylcarnitine (2)	0.0402156	0.0111908	0.91472	0.749314	0.826371	0.580873
Lipid	Fatty Acid Metabolism(Acyl Carnitine)	acetylcarnitine (C2)	0.00211141	0.000760619	0.479207	0.6286	0.605419	0.539775
Lipid	Fatty Acid Metabolism(Acyl Carnitine)	adrenoylcarnitine (C22:4)*	0.0875336	0.0225363	0.546021	0.64853	0.946777	0.597882
Lipid	Fatty Acid Metabolism(Acyl Carnitine)	arachidonoylcarnitine (C20:4)	5.96119e-05	2.93147e-05	0.176167	0.443423	0.402604	0.486137
Lipid	Fatty Acid Metabolism(Acyl Carnitine)	arachidoylcarnitine (C20)*	0.0121122	0.0037153	0.94506	0.749885	0.467231	0.504578
Lipid	Fatty Acid Metabolism(Acyl Carnitine)	behenoylcarnitine (C22)*	0.255992	0.0576091	0.164503	0.428244	0.829907	0.581125
Lipid	Fatty Acid Metabolism(Acyl Carnitine)	cerotoylcarnitine (C26)*	0.197982	0.0460023	0.431218	0.611551	0.244978	0.439503
Lipid	Fatty Acid Metabolism(Acyl Carnitine)	cis-4-decenoylcarnitine (C10:1)	0.000503305	0.000206072	0.377744	0.584675	0.035784	0.199545
Lipid	Fatty Acid Metabolism(Acyl Carnitine)	decanoylcarnitine (C10)	0.000347149	0.000146658	0.704659	0.689613	0.946807	0.597882
Lipid	Fatty Acid Metabolism(Acyl Carnitine)	dihomo-linolenoylcarnitine (20:3n3 or 6)*	3.52817e-05	1.84223e-05	0.13715	0.417852	0.26884	0.445523
Lipid	Fatty Acid Metabolism(Acyl Carnitine)	dihomo-linoleoylcarnitine (C20:2)*	0.00974835	0.00303022	0.793552	0.721066	0.947408	0.597882
Lipid	Fatty Acid Metabolism(Acyl Carnitine)	docosapentaenoylcarnitine (C22:5n3)*	0.000144739	6.49874e-05	0.622716	0.665876	0.509378	0.517117
Lipid	Fatty Acid Metabolism(Acyl Carnitine)	eicosenoylcarnitine (C20:1)*	3.29506e-05	1.74066e-05	0.681837	0.680562	0.140846	0.375126
Lipid	Fatty Acid Metabolism(Acyl Carnitine)	hexanoylcarnitine (C6)	0.00255869	0.000904226	0.47026	0.6286	0.391745	0.485201
Lipid	Fatty Acid Metabolism(Acyl Carnitine)	laurylcarnitine (C12)	0.000112999	5.25122e-05	0.582145	0.658274	0.217043	0.429847
Lipid	Fatty Acid Metabolism(Acyl Carnitine)	linolenoylcarnitine (C18:3)*	0.271836	0.061027	0.795911	0.721066	0.749074	0.570873
Lipid	Fatty Acid Metabolism(Acyl Carnitine)	linoleoylcarnitine (C18:2)*	0.00366533	0.00125192	0.840481	0.731	0.81516	0.580873
Lipid	Fatty Acid Metabolism(Acyl Carnitine)	margaroylcarnitine*	1.49776e-05	8.8666e-06	0.761889	0.703944	0.43071	0.487964
Lipid	Fatty Acid Metabolism(Acyl Carnitine)	myristoleoylcarnitine (C14:1)*	2.23646e-05	1.24468e-05	0.817735	0.722264	0.431164	0.487964
Lipid	Fatty Acid Metabolism(Acyl Carnitine)	myristoylcarnitine (C14)	7.34555e-06	4.74107e-06	0.300163	0.547528	0.627941	0.544039
Lipid	Fatty Acid Metabolism(Acyl Carnitine)	octanoylcarnitine (C8)	0.000636349	0.000250828	0.550915	0.649071	0.0746615	0.293945
Lipid	Fatty Acid Metabolism(Acyl Carnitine)	oleoylcarnitine (C18:1)	7.34059e-05	3.572e-05	0.375249	0.584675	0.890864	0.586684
Lipid	Fatty Acid Metabolism(Acyl Carnitine)	palmitoleoylcarnitine (C16:1)*	0.000151458	6.76772e-05	0.991826	0.75641	0.473915	0.505758
Lipid	Fatty Acid Metabolism(Acyl Carnitine)	palmitoylcarnitine (C16)	2.25543e-05	1.24777e-05	0.321452	0.552834	0.698916	0.560265
Lipid	Fatty Acid Metabolism(Acyl Carnitine)	pentadecanoylcarnitine (C15)*	5.0042e-05	2.52773e-05	0.240793	0.500669	0.677828	0.556725
Lipid	Fatty Acid Metabolism(Acyl Carnitine)	stearoylcarnitine (C18)	1.06047e-05	6.44198e-06	0.715623	0.690333	0.303512	0.450646
Lipid	Fatty Acid Synthesis	2-methylmalonylcarnitine (C4-DC)	0.104838	0.0264781	0.731264	0.696159	0.342325	0.470813
Lipid	Fatty Acid Synthesis	malonylcarnitine	0.00124386	0.000471869	0.924014	0.749314	0.750405	0.570873
Lipid	Fatty Acid, Dicarboxylate	2-hydroxyglutarate	4.18298e-10	7.62307e-10	0.275884	0.534928	0.659262	0.550943
Lipid	Fatty Acid, Dicarboxylate	adipate	0.840642	0.161428	0.824992	0.722489	0.252647	0.439503
Lipid	Fatty Acid, Dicarboxylate	azelate (nonanedioate)	0.94163	0.176447	0.752789	0.702991	0.151783	0.375126
Lipid	Fatty Acid, Monohydroxy	13-HODE + 9-HODE	0.0456313	0.0125106	0.605496	0.662001	0.850231	0.583262
Lipid	Fatty Acid, Monohydroxy	2-hydroxystearate	6.41797e-06	4.26073e-06	0.27867	0.534928	0.415783	0.487964
Lipid	Glycerolipid Metabolism	glycerol	7.18194e-12	2.06635e-11	0.0171215	0.175878	0.110259	0.354559
Lipid	Glycerolipid Metabolism	glycerol 3-phosphate	4.97752e-06	3.37681e-06	0.353628	0.570343	0.293162	0.447728
Lipid	Glycerolipid Metabolism	glycerophosphoglycerol	2.38558e-11	5.40786e-11	0.0647058	0.32236	0.0259348	0.169781
Lipid	Inositol Metabolism	inositol 1-phosphate (I1P)	9.2197e-05	4.37195e-05	0.129403	0.415398	0.129403	0.372304
Lipid	Inositol Metabolism	myo-inositol	0.163118	0.0393483	0.0432783	0.265307	0.277346	0.446318
Lipid	Long Chain Fatty Acid	10-heptadecenoate (17:1n7)	0.0531725	0.0143246	0.238014	0.499798	0.755702	0.570873
Lipid	Long Chain Fatty Acid	10-nonadecenoate (19:1n9)	0.0270229	0.0078231	0.601519	0.662001	0.289157	0.447728
Lipid	Long Chain Fatty Acid	eicosenoate (20:1)	0.00298177	0.00103795	0.755968	0.703676	0.817913	0.580873
Lipid	Long Chain Fatty Acid	erucate (22:1n9)	0.0236631	0.00698192	0.137423	0.417852	0.593081	0.539011
Lipid	Long Chain Fatty Acid	oleate/vaccenate (18:1)	1.22325e-06	9.973e-07	0.241063	0.500669	0.642168	0.545824
Lipid	Lysolipid	1-arachidonoyl-GPC (20:4n6)*	4.65073e-06	3.17831e-06	0.467041	0.6286	0.367291	0.480416
Lipid	Lysolipid	1-arachidonoyl-GPE (20:4n6)*	0.00662767	0.00215933	0.84508	0.733148	0.882311	0.586684
Lipid	Lysolipid	1-arachidonoyl-GPI (20:4)*	3.45662e-06	2.49044e-06	0.00306064	0.061225	0.00306064	0.045233
Lipid	Lysolipid	1-linoleoyl-GPC (18:2)	6.88874e-10	1.20803e-09	0.713062	0.689613	0.702867	0.560265
Lipid	Lysolipid	1-linoleoyl-GPE (18:2)*	3.33717e-06	2.45994e-06	0.85321	0.733206	0.0666971	0.293945
Lipid	Lysolipid	1-oleoyl-GPC (18:1)	4.96981e-13	2.56615e-12	0.586799	0.658274	0.446031	0.497447
Lipid	Lysolipid	1-oleoyl-GPE (18:1)	8.79942e-05	4.21567e-05	0.866436	0.736716	0.872396	0.586684
Lipid	Lysolipid	1-oleoyl-GPI (18:1)*	6.36235e-11	1.34394e-10	0.145522	0.417852	0.145522	0.375126
Lipid	Lysolipid	1-oleoyl-GPS (18:1)	0.00914762	0.00285303	0.1414	0.417852	0.1414	0.375126
Lipid	Lysolipid	1-palmitoyl-GPC (16:0)	2.65238e-12	8.85146e-12	0.639713	0.667868	0.441873	0.494608
Lipid	Lysolipid	1-palmitoyl-GPE (16:0)	1.6045e-05	9.37901e-06	0.0728445	0.333966	0.735054	0.565163
Lipid	Lysolipid	1-palmitoyl-GPG (16:0)*	1.66375e-13	1.03089e-12	0.00795389	0.107967	0.00795389	0.0717489
Lipid	Lysolipid	1-stearoyl-GPC (18:0)	4.37825e-12	1.40319e-11	0.00726371	0.105234	0.00532623	0.0544519
Lipid	Lysolipid	1-stearoyl-GPE (18:0)	6.56854e-08	7.537e-08	0.0629186	0.318852	0.789607	0.577978
Lipid	Lysolipid	1-stearoyl-GPG (18:0)	3.94129e-13	2.15479e-12	0.0653072	0.32236	0.0653072	0.293945
Lipid	Lysolipid	1-stearoyl-GPI (18:0)	2.40504e-06	1.80267e-06	0.568596	0.657983	0.270942	0.445523
Lipid	Lysolipid	1-stearoyl-GPS (18:0)*	0.0637558	0.0168821	0.831459	0.725379	0.346865	0.474927
Lipid	Lysolipid	2-palmitoyl-GPC (16:0)*	5.76695e-08	6.87173e-08	0.765347	0.704258	0.457508	0.498412
Lipid	Lysoplasmalogen	1-(1-enyl-oleoyl)-2-linoleoyl-GPE (P-18:1/18:2)*	0.31634	0.0696717	0.101519	0.401925	0.601047	0.539011
Lipid	Lysoplasmalogen	1-(1-enyl-oleoyl)-2-oleoyl-GPE (P-18:1/18:1)*	0.240686	0.0547883	0.441869	0.61953	0.964157	0.602625
Lipid	Lysoplasmalogen	1-(1-enyl-oleoyl)-GPE (P-18:1)*	0.000135351	6.10673e-05	0.767116	0.704258	0.821775	0.580873
Lipid	Lysoplasmalogen	1-(1-enyl-palmitoyl)-GPC (P-16:0)*	0.0026727	0.000937386	0.739034	0.696995	0.144916	0.375126
Lipid	Lysoplasmalogen	1-(1-enyl-palmitoyl)-GPE (P-16:0)*	0.743825	0.147084	0.90442	0.748908	0.989458	0.610267
Lipid	Lysoplasmalogen	1-(1-enyl-stearoyl)-GPE (P-18:0)*	0.114868	0.0286993	0.612434	0.663167	0.916568	0.593063
Lipid	Medium Chain Fatty Acid	caproate (6:0)	0.0408985	0.0113131	0.325863	0.557896	0.754216	0.570873
Lipid	Medium Chain Fatty Acid	caprylate (8:0)	0.805884	0.155396	0.856522	0.733206	0.534297	0.524847
Lipid	Medium Chain Fatty Acid	heptanoate (7:0)	0.296288	0.0657225	0.983649	0.754899	0.811756	0.580873
Lipid	Mevalonate Metabolism	3-hydroxy-3-methylglutarate	0.113201	0.028359	0.162304	0.428244	0.205022	0.424567
Lipid	Monoacylglycerol	1-oleoylglycerol (18:1)	9.72816e-09	1.31038e-08	0.0667597	0.324659	0.147307	0.375126
Lipid	Phosphatidylserine (PS)	1-stearoyl-2-arachidonoyl-GPS (18:0/20:4)	0.00230703	0.000818402	0.955637	0.751171	0.78858	0.577978
Lipid	Phosphatidylserine (PS)	1-stearoyl-2-oleoyl-GPS (18:0/18:1)	8.06994e-06	5.13726e-06	0.407092	0.604398	0.502892	0.517117
Lipid	Phospholipid Metabolism	1,2-dilinoleoyl-GPC (18:2/18:2)	0.0629331	0.0167598	0.723565	0.69272	0.249402	0.439503
Lipid	Phospholipid Metabolism	1,2-dilinoleoyl-GPE (18:2/18:2)*	0.000304577	0.000131056	0.0732743	0.333966	0.11317	0.354559
Lipid	Phospholipid Metabolism	1,2-dioleoyl-GPE (18:1/18:1)	0.000115996	5.36368e-05	0.117102	0.402716	0.0449476	0.220033
Lipid	Phospholipid Metabolism	1,2-dipalmitoyl-GPC (16:0/16:0)	0.01895	0.00564507	0.685045	0.680795	0.393325	0.485201
Lipid	Phospholipid Metabolism	1,2-dipalmitoyl-GPE (16:0/16:0)*	0.000381161	0.000158152	0.0365336	0.255331	0.518185	0.517117
Lipid	Phospholipid Metabolism	1-linoleoyl-2-arachidonoyl-GPC (18:2/20:4n6)*	0.91137	0.172165	0.649534	0.670849	0.138834	0.375126
Lipid	Phospholipid Metabolism	1-linoleoyl-2-linolenoyl-GPC (18:2/18:3)*	0.00212905	0.000764013	0.0905064	0.378015	0.277241	0.446318
Lipid	Phospholipid Metabolism	1-oleoyl-2-arachidonoyl-GPE (18:1/20:4)*	0.00228265	0.000812856	0.428576	0.610081	0.771645	0.573576
Lipid	Phospholipid Metabolism	1-oleoyl-2-linoleoyl-GPC (18:1/18:2)*	0.342314	0.0745095	0.888592	0.74227	0.0390335	0.20485
Lipid	Phospholipid Metabolism	1-oleoyl-2-linoleoyl-GPE (18:1/18:2)*	0.00139869	0.000519991	0.115345	0.402716	0.108804	0.354559
Lipid	Phospholipid Metabolism	1-palmitoyl-2-alpha-linolenoyl-GPC (16:0/18:3n3)*	1.309e-07	1.39842e-07	0.0807842	0.361225	0.119607	0.370542
Lipid	Phospholipid Metabolism	1-palmitoyl-2-arachidonoyl-GPA (16:0/20:4)*	0.00199967	0.000725993	0.310839	0.547528	0.515816	0.517117
Lipid	Phospholipid Metabolism	1-palmitoyl-2-arachidonoyl-GPC (16:0/20:4n6)	0.0694407	0.0182862	0.511877	0.635357	0.848293	0.583262
Lipid	Phospholipid Metabolism	1-palmitoyl-2-arachidonoyl-GPE (16:0/20:4)*	0.014204	0.00431425	0.420527	0.607984	0.57613	0.532227
Lipid	Phospholipid Metabolism	1-palmitoyl-2-arachidonoyl-GPI (16:0/20:4)*	0.0483962	0.0131908	0.470617	0.6286	0.754334	0.570873
Lipid	Phospholipid Metabolism	1-palmitoyl-2-linoleoyl-GPA (16:0/18:2)*	0.00256959	0.000904638	0.50826	0.635357	0.652065	0.546776
Lipid	Phospholipid Metabolism	1-palmitoyl-2-linoleoyl-GPC (16:0/18:2)	0.976939	0.181236	0.46208	0.6286	0.810904	0.580873
Lipid	Phospholipid Metabolism	1-palmitoyl-2-linoleoyl-GPE (16:0/18:2)	3.58395e-06	2.54276e-06	0.214756	0.475952	0.929617	0.596473
Lipid	Phospholipid Metabolism	1-palmitoyl-2-linoleoyl-GPI (16:0/18:2)	0.944246	0.176581	0.820936	0.722264	0.562546	0.528801
Lipid	Phospholipid Metabolism	1-palmitoyl-2-oleoyl-GPC (16:0/18:1)	6.04866e-06	4.05587e-06	0.152247	0.418205	0.537965	0.524847
Lipid	Phospholipid Metabolism	1-palmitoyl-2-oleoyl-GPE (16:0/18:1)	4.08735e-07	3.77831e-07	0.113586	0.402716	0.363496	0.480416
Lipid	Phospholipid Metabolism	1-palmitoyl-2-oleoyl-GPG (16:0/18:1)	2.0185e-08	2.64232e-08	0.0835305	0.362182	0.177103	0.402088
Lipid	Phospholipid Metabolism	1-palmitoyl-2-oleoyl-GPI (16:0/18:1)*	0.40194	0.085879	0.686032	0.680795	0.661288	0.551134
Lipid	Phospholipid Metabolism	1-palmitoyl-2-palmitoleoyl-GPC (16:0/16:1)*	6.88905e-09	9.85055e-09	0.0129548	0.145583	0.00595034	0.0570304
Lipid	Phospholipid Metabolism	1-palmitoyl-2-stearoyl-GPC (16:0/18:0)	0.511788	0.106892	0.815953	0.722264	0.499182	0.517117
Lipid	Phospholipid Metabolism	1-palmitoyl-2-stearoyl-GPE (16:0/18:0)*	0.0264347	0.00770191	0.468064	0.6286	0.464503	0.503404
Lipid	Phospholipid Metabolism	1-stearoyl-2-arachidonoyl-GPC (18:0/20:4)	0.0296562	0.00840341	0.80913	0.721904	0.299263	0.447728
Lipid	Phospholipid Metabolism	1-stearoyl-2-arachidonoyl-GPE (18:0/20:4)	0.00202805	0.000733433	0.270911	0.528193	0.803385	0.580873
Lipid	Phospholipid Metabolism	1-stearoyl-2-arachidonoyl-GPI (18:0/20:4)	0.0296322	0.00840341	0.916918	0.749314	0.701647	0.560265
Lipid	Phospholipid Metabolism	1-stearoyl-2-linoleoyl-GPA (18:0/18:2)*	0.00032057	0.000136673	0.494647	0.634128	0.887779	0.586684
Lipid	Phospholipid Metabolism	1-stearoyl-2-linoleoyl-GPC (18:0/18:2)*	0.110318	0.0277115	0.541201	0.64853	0.964749	0.602625
Lipid	Phospholipid Metabolism	1-stearoyl-2-linoleoyl-GPE (18:0/18:2)*	3.55597e-06	2.54231e-06	0.0450576	0.271831	0.854562	0.583262
Lipid	Phospholipid Metabolism	1-stearoyl-2-linoleoyl-GPI (18:0/18:2)	3.3928e-06	2.46356e-06	0.270992	0.528193	0.0676837	0.293945
Lipid	Phospholipid Metabolism	1-stearoyl-2-linoleoyl-GPS (18:0/18:2)	1.75905e-05	1.01547e-05	0.42166	0.607984	0.39602	0.485201
Lipid	Phospholipid Metabolism	1-stearoyl-2-oleoyl-GPC (18:0/18:1)	4.188e-07	3.81611e-07	0.220502	0.476034	0.64901	0.546776
Lipid	Phospholipid Metabolism	1-stearoyl-2-oleoyl-GPE (18:0/18:1)	1.14533e-07	1.23779e-07	0.0303607	0.235498	0.178586	0.402088
Lipid	Phospholipid Metabolism	choline	0.00457312	0.00152608	0.799972	0.721904	0.994362	0.610267
Lipid	Phospholipid Metabolism	choline phosphate	1.34616e-12	5.4398e-12	0.00836443	0.109625	0.00341848	0.045233
Lipid	Phospholipid Metabolism	cytidine 5'-diphosphocholine	5.45684e-07	4.61065e-07	0.493548	0.634128	0.457094	0.498412
Lipid	Phospholipid Metabolism	cytidine-5'-diphosphoethanolamine	1.69393e-10	3.27997e-10	0.0261335	0.234848	0.0451975	0.220033
Lipid	Phospholipid Metabolism	glycerophosphoethanolamine	0.181838	0.0428946	0.310864	0.547528	0.52147	0.517117
Lipid	Phospholipid Metabolism	glycerophosphoinositol*	1.54166e-12	5.79378e-12	0.0216363	0.200572	0.059514	0.27656
Lipid	Phospholipid Metabolism	glycerophosphorylcholine (GPC)	2.33797e-06	1.76664e-06	0.377431	0.584675	0.250566	0.439503
Lipid	Phospholipid Metabolism	phosphoethanolamine	1.37897e-16	3.20413e-15	6.14908e-05	0.0038952	0.000271761	0.011907
Lipid	Phospholipid Metabolism	trimethylamine N-oxide	0.609002	0.123856	0.815293	0.722264	0.200489	0.424567
Lipid	Plasmalogen	1-(1-enyl-palmitoyl)-2-arachidonoyl-GPC (P-16:0/20:4)*	0.0272294	0.00783518	0.580128	0.658274	0.600884	0.539011
Lipid	Plasmalogen	1-(1-enyl-palmitoyl)-2-arachidonoyl-GPE (P-16:0/20:4)*	0.292376	0.06501	0.361362	0.577081	0.471654	0.505758
Lipid	Plasmalogen	1-(1-enyl-palmitoyl)-2-linoleoyl-GPC (P-16:0/18:2)*	0.329494	0.0719853	0.405245	0.604398	0.595668	0.539011
Lipid	Plasmalogen	1-(1-enyl-palmitoyl)-2-linoleoyl-GPE (P-16:0/18:2)*	0.155337	0.0377942	0.510296	0.635357	0.814023	0.580873
Lipid	Plasmalogen	1-(1-enyl-palmitoyl)-2-oleoyl-GPC (P-16:0/18:1)*	0.000272548	0.00011837	0.12174	0.405881	0.320638	0.45318
Lipid	Plasmalogen	1-(1-enyl-palmitoyl)-2-oleoyl-GPE (P-16:0/18:1)*	0.137348	0.033771	0.255038	0.516595	0.841603	0.583262
Lipid	Plasmalogen	1-(1-enyl-palmitoyl)-2-palmitoleoyl-GPC (P-16:0/16:1)*	1.19025e-05	7.18345e-06	0.0506223	0.287169	0.693739	0.560265
Lipid	Plasmalogen	1-(1-enyl-palmitoyl)-2-palmitoyl-GPC (P-16:0/16:0)*	0.201131	0.0466175	0.517025	0.638016	0.155091	0.375126
Lipid	Plasmalogen	1-(1-enyl-stearoyl)-2-arachidonoyl-GPE (P-18:0/20:4)*	0.240021	0.0547883	0.462736	0.6286	0.763347	0.573576
Lipid	Plasmalogen	1-(1-enyl-stearoyl)-2-linoleoyl-GPE (P-18:0/18:2)*	0.0906483	0.0231458	0.607874	0.662001	0.565617	0.528888
Lipid	Plasmalogen	1-(1-enyl-stearoyl)-2-oleoyl-GPE (P-18:0/18:1)	0.0592317	0.015865	0.57626	0.658274	0.74626	0.570873
Lipid	Polyunsaturated Fatty Acid (n3 and n6)	arachidonate (20:4n6)	6.06575e-06	4.05587e-06	0.255527	0.516595	0.126321	0.372304
Lipid	Polyunsaturated Fatty Acid (n3 and n6)	dihomo-linoleate (20:2n6)	9.89543e-05	4.66856e-05	0.33503	0.559936	0.905677	0.587255
Lipid	Polyunsaturated Fatty Acid (n3 and n6)	dihomo-linolenate (20:3n3 or n6)	4.22026e-06	2.94918e-06	0.298976	0.547528	0.563334	0.528801
Lipid	Polyunsaturated Fatty Acid (n3 and n6)	docosahexaenoate (DHA; 22:6n3)	8.78202e-06	5.5118e-06	0.386612	0.590128	0.0357598	0.199545
Lipid	Polyunsaturated Fatty Acid (n3 and n6)	docosapentaenoate (n3 DPA; 22:5n3)	4.17541e-06	2.93995e-06	0.859564	0.734157	0.925531	0.595346
Lipid	Polyunsaturated Fatty Acid (n3 and n6)	docosapentaenoate (n6 DPA; 22:5n6)	0.00147579	0.000544301	0.653064	0.670849	0.544589	0.526116
Lipid	Polyunsaturated Fatty Acid (n3 and n6)	eicosapentaenoate (EPA; 20:5n3)	1.00368e-05	6.13715e-06	0.928569	0.749314	0.222638	0.429847
Lipid	Polyunsaturated Fatty Acid (n3 and n6)	linoleate (18:2n6)	2.16893e-06	1.65234e-06	0.049116	0.287169	0.128017	0.372304
Lipid	Polyunsaturated Fatty Acid (n3 and n6)	linolenate [alpha or gamma; (18:3n3 or 6)]	0.00190211	0.000693282	0.146219	0.417852	0.145601	0.375126
Lipid	Polyunsaturated Fatty Acid (n3 and n6)	mead acid (20:3n9)	5.34522e-05	2.65667e-05	0.45907	0.6286	0.881707	0.586684
Lipid	Primary Bile Acid Metabolism	chenodeoxycholate	0.148195	0.0361512	0.335206	0.559936	0.382794	0.485201
Lipid	Primary Bile Acid Metabolism	cholate	3.56852e-05	1.85289e-05	0.00467676	0.0772837	0.15066	0.375126
Lipid	Primary Bile Acid Metabolism	glycochenodeoxycholate	0.281658	0.0630095	0.625448	0.665876	0.772372	0.573576
Lipid	Primary Bile Acid Metabolism	glycocholate	0.0279582	0.00801787	0.0487401	0.287169	0.539458	0.524847
Lipid	Secondary Bile Acid Metabolism	deoxycholate	0.000848641	0.000328645	0.0016788	0.042538	0.0282465	0.1768
Lipid	Secondary Bile Acid Metabolism	glycodeoxycholate	0.0162457	0.0049183	0.139472	0.417852	0.633097	0.544961
Lipid	Sphingolipid Metabolism	behenoyl dihydrosphingomyelin (d18:0/22:0)*	0.168625	0.0401856	0.58683	0.658274	0.252137	0.439503
Lipid	Sphingolipid Metabolism	behenoyl sphingomyelin (d18:1/22:0)*	0.252624	0.056989	0.679614	0.680562	0.00466471	0.0493334
Lipid	Sphingolipid Metabolism	glycosyl-N-palmitoyl-sphingosine (d18:1/16:0)	0.721995	0.143079	0.927896	0.749314	0.933771	0.596642
Lipid	Sphingolipid Metabolism	glycosyl-N-stearoyl-sphingosine (d18:1/18:0)	0.74695	0.147084	0.873714	0.737187	0.152877	0.375126
Lipid	Sphingolipid Metabolism	lactosyl-N-nervonoyl-sphingosine (d18:1/24:1)*	5.22386e-09	7.83095e-09	0.440754	0.61953	0.59859	0.539011
Lipid	Sphingolipid Metabolism	lactosyl-N-palmitoyl-sphingosine (d18:1/16:0)	0.00215154	0.000769113	0.735252	0.696159	0.846875	0.583262
Lipid	Sphingolipid Metabolism	lignoceroyl sphingomyelin (d18:1/24:0)	0.197576	0.0460023	0.70477	0.689613	0.0541501	0.255506
Lipid	Sphingolipid Metabolism	myristoyl dihydrosphingomyelin (d18:0/14:0)*	0.867818	0.16562	0.559528	0.653398	0.637016	0.545361
Lipid	Sphingolipid Metabolism	N-behenoyl-sphingadienine (d18:2/22:0)*	0.120103	0.0297671	0.88673	0.74227	0.364614	0.480416
Lipid	Sphingolipid Metabolism	N-palmitoyl-sphingadienine (d18:2/16:0)*	7.65749e-09	1.06225e-08	0.173512	0.442602	0.0786808	0.293945
Lipid	Sphingolipid Metabolism	N-palmitoyl-sphinganine (d18:0/16:0)	0.00504195	0.00167361	0.215475	0.475952	0.273095	0.445523
Lipid	Sphingolipid Metabolism	N-palmitoyl-sphingosine (d18:1/16:0)	0.103611	0.0262394	0.266	0.528193	0.896609	0.586684
Lipid	Sphingolipid Metabolism	N-stearoyl-sphingadienine (d18:2/18:0)*	0.0205967	0.00609654	0.496574	0.634128	0.0787081	0.293945
Lipid	Sphingolipid Metabolism	N-stearoyl-sphinganine (d18:0/18:0)*	0.216368	0.0499001	0.355642	0.570343	0.102494	0.344333
Lipid	Sphingolipid Metabolism	N-stearoyl-sphingosine (d18:1/18:0)*	0.552319	0.114329	0.681109	0.680562	0.0774228	0.293945
Lipid	Sphingolipid Metabolism	N-tetracosadienoyl-sphingosine (d18:1/24:2)*	0.192748	0.0451247	0.340733	0.564424	0.141214	0.375126
Lipid	Sphingolipid Metabolism	palmitoyl dihydrosphingomyelin (d18:0/16:0)*	0.932441	0.175788	0.524547	0.638999	0.427755	0.487964
Lipid	Sphingolipid Metabolism	palmitoyl sphingomyelin (d18:1/16:0)	0.00458106	0.00152608	0.629754	0.666726	0.398665	0.485201
Lipid	Sphingolipid Metabolism	sphinganine	9.10403e-07	7.48807e-07	0.0877291	0.373768	0.59695	0.539011
Lipid	Sphingolipid Metabolism	sphinganine-1-phosphate	0.575821	0.118403	0.156697	0.421927	0.708167	0.560265
Lipid	Sphingolipid Metabolism	sphingomyelin (d17:2/16:0, d18:2/15:0)*	0.906479	0.17159	0.708593	0.689613	0.456792	0.498412
Lipid	Sphingolipid Metabolism	sphingomyelin (d18:0/18:0, d19:0/17:0)*	0.24189	0.0548237	0.625411	0.665876	0.708778	0.560265
Lipid	Sphingolipid Metabolism	sphingomyelin (d18:0/20:0, d16:0/22:0)*	0.503157	0.105326	0.12079	0.405881	0.0924937	0.326068
Lipid	Sphingolipid Metabolism	sphingomyelin (d18:1/14:0, d16:1/16:0)*	0.136747	0.0337125	0.976394	0.753499	0.754936	0.570873
Lipid	Sphingolipid Metabolism	sphingomyelin (d18:1/15:0, d16:1/17:0)*	0.872613	0.166194	0.304444	0.547528	0.959315	0.601682
Lipid	Sphingolipid Metabolism	sphingomyelin (d18:1/17:0, d17:1/18:0, d19:1/16:0)	0.0786522	0.0205919	0.61874	0.664317	0.598194	0.539011
Lipid	Sphingolipid Metabolism	sphingomyelin (d18:1/18:1, d18:2/18:0)	0.00165101	0.00060652	0.817322	0.722264	0.898331	0.586684
Lipid	Sphingolipid Metabolism	sphingomyelin (d18:1/19:0, d19:1/18:0)*	0.329943	0.0719853	0.736315	0.696159	0.726331	0.565163
Lipid	Sphingolipid Metabolism	sphingomyelin (d18:1/20:0, d16:1/22:0)*	0.00325097	0.00111909	0.896019	0.743571	0.759801	0.572559
Lipid	Sphingolipid Metabolism	sphingomyelin (d18:1/20:1, d18:2/20:0)*	3.29618e-05	1.74066e-05	0.944172	0.749885	0.252807	0.439503
Lipid	Sphingolipid Metabolism	sphingomyelin (d18:1/21:0, d17:1/22:0, d16:1/23:0)*	0.052473	0.0141772	0.849707	0.733148	0.73229	0.565163
Lipid	Sphingolipid Metabolism	sphingomyelin (d18:1/22:1, d18:2/22:0, d16:1/24:1)*	0.000672027	0.000263544	0.960516	0.751171	0.827605	0.580873
Lipid	Sphingolipid Metabolism	sphingomyelin (d18:1/22:2, d18:2/22:1, d16:1/24:2)*	0.00367727	0.00125192	0.999504	0.758259	0.0749962	0.293945
Lipid	Sphingolipid Metabolism	sphingomyelin (d18:1/24:1, d18:2/24:0)*	0.0790793	0.0206456	0.473859	0.6286	0.292955	0.447728
Lipid	Sphingolipid Metabolism	sphingomyelin (d18:1/25:0, d19:0/24:1, d20:1/23:0, d19:1/24:0)*	0.072512	0.019038	0.743263	0.699236	0.202197	0.424567
Lipid	Sphingolipid Metabolism	sphingomyelin (d18:2/14:0, d18:1/14:1)*	0.0632136	0.0167864	0.379962	0.584675	0.458272	0.498412
Lipid	Sphingolipid Metabolism	sphingomyelin (d18:2/16:0, d18:1/16:1)*	0.185403	0.0436248	0.926681	0.749314	0.664944	0.55191
Lipid	Sphingolipid Metabolism	sphingomyelin (d18:2/18:1)*	0.720584	0.143079	0.560754	0.653398	0.43579	0.491386
Lipid	Sphingolipid Metabolism	sphingomyelin (d18:2/21:0, d16:2/23:0)*	0.861489	0.164751	0.83211	0.725379	0.394591	0.485201
Lipid	Sphingolipid Metabolism	sphingomyelin (d18:2/23:0, d18:1/23:1, d17:1/24:1)*	0.901186	0.170936	0.483442	0.631425	0.212136	0.429847
Lipid	Sphingolipid Metabolism	sphingomyelin (d18:2/23:1)*	0.685773	0.136483	0.542641	0.64853	0.990316	0.610267
Lipid	Sphingolipid Metabolism	sphingomyelin (d18:2/24:1, d18:1/24:2)*	0.00115565	0.000443838	0.935919	0.749885	0.390107	0.485201
Lipid	Sphingolipid Metabolism	sphingomyelin (d18:2/24:2)*	0.00166579	0.000609537	0.7127	0.689613	0.812918	0.580873
Lipid	Sphingolipid Metabolism	sphingosine 1-phosphate	0.581583	0.119061	0.49719	0.634128	0.164981	0.386258
Lipid	Sphingolipid Metabolism	stearoyl sphingomyelin (d18:1/18:0)	1.39594e-05	8.37048e-06	0.633871	0.666763	0.0955203	0.328458
Lipid	Sphingolipid Metabolism	tricosanoyl sphingomyelin (d18:1/23:0)*	0.379756	0.0820825	0.959495	0.751171	0.326472	0.457211
Lipid	Sterol	4-cholesten-3-one	0.431723	0.0916106	0.157636	0.421927	0.923876	0.595346
Lipid	Sterol	7-hydroxycholesterol (alpha or beta)	0.769237	0.149571	0.0534911	0.294648	0.368625	0.480416
Lipid	Sterol	beta-sitosterol	0.629192	0.126852	0.148002	0.418205	0.250945	0.439503
Lipid	Sterol	campesterol	0.941067	0.176447	0.523223	0.638999	0.949959	0.59826
Lipid	Sterol	cholesterol	0.0101792	0.0031536	0.603842	0.662001	0.547214	0.526116
Nucleotide	Purine and Pyrimidine Metabolism	methylphosphate	0.000229211	0.000100964	0.163513	0.428244	0.00555326	0.0549416
Nucleotide	Purine Metabolism, (Hypo)Xanthine/Inosine containing	AICA ribonucleotide	0.0937649	0.023876	0.71981	0.690866	0.54076	0.524847
Nucleotide	Purine Metabolism, (Hypo)Xanthine/Inosine containing	hypoxanthine	0.499968	0.104977	0.375372	0.584675	0.734397	0.565163
Nucleotide	Purine Metabolism, (Hypo)Xanthine/Inosine containing	inosine	0.0303121	0.00853723	0.0360857	0.255331	0.0837096	0.302045
Nucleotide	Purine Metabolism, (Hypo)Xanthine/Inosine containing	inosine 5'-monophosphate (IMP)	0.000526459	0.00021182	0.5516	0.649071	0.228778	0.429847
Nucleotide	Purine Metabolism, (Hypo)Xanthine/Inosine containing	xanthine	6.11446e-08	7.19359e-08	0.0292141	0.234848	0.732308	0.565163
Nucleotide	Purine Metabolism, Adenine containing	2'-deoxyadenosine 5'-monophosphate	0.0297883	0.00841519	0.311164	0.547528	0.417435	0.487964
Nucleotide	Purine Metabolism, Adenine containing	adenine	0.0515675	0.0140141	0.125313	0.414162	0.864443	0.583976
Nucleotide	Purine Metabolism, Adenine containing	adenosine	0.116476	0.029023	0.524047	0.638999	0.319002	0.45318
Nucleotide	Purine Metabolism, Adenine containing	adenosine 5'-diphosphate (ADP)	0.0168297	0.00506659	0.316027	0.550983	0.313622	0.451587
Nucleotide	Purine Metabolism, Adenine containing	adenosine 5'-monophosphate (AMP)	0.00791096	0.00250944	0.183904	0.45388	0.218015	0.429847
Nucleotide	Purine Metabolism, Adenine containing	adenylosuccinate	0.777002	0.150451	0.0716649	0.333966	0.900218	0.586684
Nucleotide	Purine Metabolism, Guanine containing	7-methylguanine	1.08051e-12	4.74775e-12	0.00346668	0.0642085	0.00346668	0.045233
Nucleotide	Purine Metabolism, Guanine containing	guanine	6.54501e-08	7.537e-08	0.300506	0.547528	0.509362	0.517117
Nucleotide	Purine Metabolism, Guanine containing	guanosine	0.000690579	0.000269681	0.304152	0.547528	0.304152	0.450646
Nucleotide	Purine Metabolism, Guanine containing	guanosine 5'- monophosphate (5'-GMP)	0.666576	0.13352	0.150367	0.418205	0.366217	0.480416
Nucleotide	Pyrimidine Metabolism, Cytidine containing	2'-O-methylcytidine	2.1515e-11	4.99915e-11	0.855508	0.733206	0.855508	0.583262
Nucleotide	Pyrimidine Metabolism, Cytidine containing	3-methylcytidine	3.15349e-09	4.96768e-09	0.128654	0.415398	0.92592	0.595346
Nucleotide	Pyrimidine Metabolism, Cytidine containing	cytidine	0.0799342	0.0208103	0.341557	0.564424	0.176264	0.402088
Nucleotide	Pyrimidine Metabolism, Cytidine containing	cytidine 5'-monophosphate (5'-CMP)	0.00677505	0.00219404	0.108447	0.402716	0.556933	0.528575
Nucleotide	Pyrimidine Metabolism, Cytidine containing	cytosine	0.000315809	0.000135263	0.76307	0.703944	0.665818	0.55191
Nucleotide	Pyrimidine Metabolism, Orotate containing	dihydroorotate	1.9957e-08	2.64232e-08	2.4076e-07	9.1507e-05	2.00742e-07	6.15677e-05
Nucleotide	Pyrimidine Metabolism, Orotate containing	N-carbamoylaspartate	2.14651e-07	2.12236e-07	3.67969e-06	0.000699281	1.74233e-05	0.00267187
Nucleotide	Pyrimidine Metabolism, Orotate containing	orotate	7.40746e-14	6.2588e-13	2.88254e-05	0.00365196	0.000191807	0.0107209
Nucleotide	Pyrimidine Metabolism, Orotate containing	orotidine	0.00139037	0.000519991	0.993086	0.75641	0.826766	0.580873
Nucleotide	Pyrimidine Metabolism, Thymine containing	3-aminoisobutyrate	0.0467352	0.0127756	0.808418	0.721904	0.367582	0.480416
Nucleotide	Pyrimidine Metabolism, Thymine containing	thymidine	6.20084e-16	9.60536e-15	0.000534539	0.0169305	0.000534539	0.0163943
Nucleotide	Pyrimidine Metabolism, Uracil containing	2'-deoxyuridine	9.38849e-13	4.4525e-12	0.0158446	0.167282	0.00353958	0.045233
Nucleotide	Pyrimidine Metabolism, Uracil containing	3-ureidopropionate	0.000633784	0.000250828	0.758427	0.703676	0.94373	0.597882
Nucleotide	Pyrimidine Metabolism, Uracil containing	5-methyluridine (ribothymidine)	3.69437e-11	8.17533e-11	0.000209733	0.00885719	0.000209733	0.0107209
Nucleotide	Pyrimidine Metabolism, Uracil containing	pseudouridine	8.8362e-06	5.5118e-06	0.170821	0.438682	0.170821	0.3969
Nucleotide	Pyrimidine Metabolism, Uracil containing	uridine	1.7712e-10	3.32169e-10	0.610634	0.663108	0.503835	0.517117
Nucleotide	Pyrimidine Metabolism, Uracil containing	uridine 5'-diphosphate (UDP)	5.25218e-05	2.62447e-05	0.207645	0.469769	0.207645	0.424567
Nucleotide	Pyrimidine Metabolism, Uracil containing	uridine 5'-monophosphate (UMP)	0.0436211	0.0119981	0.113016	0.402716	0.230796	0.429847
Peptide	Acetylated Peptides	phenylacetylglutamine	0.158347	0.038326	0.0382919	0.255331	0.153175	0.375126
Peptide	Acetylated Peptides	phenylacetylglycine	0.746653	0.147084	0.113199	0.402716	0.216656	0.429847
Peptide	Dipeptide	glycylleucine	4.81174e-08	5.88441e-08	0.139086	0.417852	0.139086	0.375126
Peptide	Dipeptide	glycylvaline	2.82452e-08	3.59614e-08	0.549739	0.649071	0.0431384	0.220033
Peptide	Dipeptide	histidylalanine	0.0258094	0.00756716	0.335894	0.559936	0.335894	0.46405
Peptide	Dipeptide	leucylalanine	0.105776	0.0266425	0.579849	0.658274	0.079548	0.293945
Peptide	Dipeptide	phenylalanylalanine	0.0382153	0.0106983	0.631546	0.666763	0.380833	0.485201
Peptide	Dipeptide	valylleucine	4.86226e-09	7.40838e-09	0.328717	0.559031	0.822936	0.580873
Peptide	Dipeptide Derivative	carnosine	0.385537	0.0831386	0.951925	0.750631	0.538043	0.524847
Peptide	Gamma-glutamyl Amino Acid	gamma-glutamylalanine	0.00122883	0.000468077	0.600264	0.662001	0.260051	0.439503
Peptide	Gamma-glutamyl Amino Acid	gamma-glutamylcysteine	0.000636904	0.000250828	0.0278744	0.234848	0.0794803	0.293945
Peptide	Gamma-glutamyl Amino Acid	gamma-glutamyl-epsilon-lysine	0.00743708	0.00237681	0.0838569	0.362182	0.860799	0.583262
Peptide	Gamma-glutamyl Amino Acid	gamma-glutamylglutamate	2.9356e-05	1.57712e-05	0.5376	0.646611	0.832294	0.58147
Peptide	Gamma-glutamyl Amino Acid	gamma-glutamylglutamine	0.675051	0.134927	0.4948	0.634128	0.182627	0.405884
Peptide	Gamma-glutamyl Amino Acid	gamma-glutamylhistidine	0.235162	0.0539668	0.958593	0.751171	0.0192141	0.143088
Peptide	Gamma-glutamyl Amino Acid	gamma-glutamylisoleucine*	1.51707e-09	2.51786e-09	0.537059	0.646611	0.156557	0.375126
Peptide	Gamma-glutamyl Amino Acid	gamma-glutamylleucine	3.66225e-07	3.47326e-07	0.218224	0.475952	0.313092	0.451587
Peptide	Gamma-glutamyl Amino Acid	gamma-glutamylthreonine	0.602	0.1227	0.452353	0.625196	0.281188	0.446841
Peptide	Gamma-glutamyl Amino Acid	gamma-glutamylvaline	4.40732e-07	3.93873e-07	0.0267481	0.234848	0.200255	0.424567
Xenobiotics	Benzoate Metabolism	3-ethylphenylsulfate	0.00628594	0.00205715	0.0286593	0.234848	0.00435565	0.0493334
Xenobiotics	Benzoate Metabolism	4-ethylphenylsulfate	0.935756	0.176056	0.138978	0.417852	0.421405	0.487964
Xenobiotics	Benzoate Metabolism	4-methylcatechol sulfate	0.394455	0.0846689	0.112327	0.402716	0.71541	0.562607
Xenobiotics	Benzoate Metabolism	benzoate	0.417091	0.0889116	0.392494	0.59671	0.357732	0.480416
Xenobiotics	Benzoate Metabolism	catechol sulfate	0.0238811	0.00702397	0.118671	0.402716	0.784612	0.577978
Xenobiotics	Benzoate Metabolism	hippurate	0.069452	0.0182862	0.0738092	0.333966	0.552997	0.528575
Xenobiotics	Benzoate Metabolism	p-hydroxybenzaldehyde	0.0405617	0.0112535	0.364386	0.579475	0.958049	0.601682
Xenobiotics	Chemical	4-acetamidobenzoate	4.33164e-07	3.90867e-07	0.0935599	0.386521	0.893204	0.586684
Xenobiotics	Chemical	benzoylcarnitine*	5.03708e-07	4.3348e-07	0.950342	0.750631	0.0778182	0.293945
Xenobiotics	Chemical	glycerol 2-phosphate	3.22321e-14	3.3286e-13	0.104931	0.402716	0.871071	0.586684
Xenobiotics	Chemical	HEPES	0.525037	0.109341	0.143149	0.417852	0.595996	0.539011
Xenobiotics	Chemical	lanthionine	0.13414	0.0331577	0.586645	0.658274	0.296358	0.447728
Xenobiotics	Chemical	N-methylpipecolate	0.0816068	0.0211864	0.555975	0.6522	0.706766	0.560265
Xenobiotics	Chemical	phenol red	0.00125429	0.000473891	0.0335601	0.250106	0.32298	0.454395
Xenobiotics	Chemical	succinimide	0.00416662	0.0014031	0.617353	0.664317	0.617353	0.541601
Xenobiotics	Chemical	sulfate*	0.00867647	0.00272437	0.655799	0.671843	0.385752	0.485201
Xenobiotics	Chemical	thioproline	1.68836e-06	1.32983e-06	0.268978	0.528193	0.039407	0.20485
Xenobiotics	Chemical	trizma acetate	0.618629	0.125539	0.95015	0.750631	0.771897	0.573576
Xenobiotics	Drug	S-carboxymethyl-L-cysteine	0.0879213	0.0225736	0.207241	0.469769	0.619829	0.541601
Xenobiotics	Food Component/Plant	2-keto-3-deoxy-gluconate	0.760625	0.14883	0.985144	0.754899	0.619778	0.541601
Xenobiotics	Food Component/Plant	alliin	0.00277518	0.00096967	0.501668	0.635357	0.104247	0.344333
Xenobiotics	Food Component/Plant	beta-guanidinopropanoate	0.320592	0.0704413	0.939615	0.749885	0.946595	0.597882
Xenobiotics	Food Component/Plant	betonicine	0.00732791	0.00235666	0.0399536	0.255527	0.397404	0.485201
Xenobiotics	Food Component/Plant	cinnamoylglycine	0.147559	0.0360908	0.128901	0.415398	0.233905	0.432161
Xenobiotics	Food Component/Plant	ergothioneine	0.0196644	0.00583917	0.191064	0.463072	0.272027	0.445523
Xenobiotics	Food Component/Plant	erythritol	2.62188e-05	1.43344e-05	0.804249	0.721904	0.222374	0.429847
Xenobiotics	Food Component/Plant	gluconate	0.963422	0.179445	0.476678	0.6286	0.317486	0.45318
Xenobiotics	Food Component/Plant	homostachydrine*	0.553977	0.114418	0.872413	0.737187	0.969075	0.602872
Xenobiotics	Food Component/Plant	phytanate	0.0168446	0.00506659	0.529016	0.642385	0.288355	0.447728
Xenobiotics	Food Component/Plant	pyrraline	8.88793e-08	9.83412e-08	0.10617	0.402716	0.400785	0.485853
Xenobiotics	Food Component/Plant	quinate	1.57866e-05	9.28637e-06	0.111681	0.402716	0.298881	0.447728
Xenobiotics	Food Component/Plant	stachydrine	4.42212e-05	2.25826e-05	0.892496	0.743571	0.81378	0.580873
